# Supplementary material
Source: publisher figshare collection journal article supplement (https://rs.figshare.com/ndownloader/files/16496450)
Supplement: Supplementary file 1 [file 16496450]

## Sheet: READ ME
		Unique cage number	GPS + 1st cage	Treatment
	Cage lable:	T/L01	NBSPE3-01	CG
	Individual bee lable:	T/L01	Uniques bee number	Date
	eg	T/L01-1-29/4
	CAGE based data: is all the detail about each cage
	BEE based data: details about daily dead bee collections
	BEE based_2 data: details about individual bees and their spore counts
	Calculation for spore count:	50,000 / 1000µL (per mL) = 50
		50 x 20µL = 1000
		Therefore; spore count x 1000
	Any worksheet starting with PT is a pivot table analysis

## Sheet: CAGE based data
ID	Hive	Cage	Infection	Start_date	Start_time	PI1	PI2	PI3	PI4	PI5	PI6	PI7	PI8	PI9	PI10	PI11	PI12	PI13	PI14	PI15	PI16	PI17	PI18	PI19	PI20	PI21	PI22	PI23	PI24	PI25	PI26	cumuative total
T/L01	NBSPE3	NBSPE3-01	Non-inoculated	2016-04-28	10:30:00	1	4	2	2	2	0	1	0	0	0	0	0	1	0	1	1	0	0	0	0	0	0	0	0	0	0	15
T/L02	NBSPE3	NBSPE3-02	Inoculated	2016-04-28	10:30:00	2	2	6	3	2	0	0	0	0	0	0	0	0	0	0	0	0	0	0	0	0	0	0	0	0	0	15
T/L03	NBSPE3	NBSPE3-03	Non-inoculated	2016-04-28	10:30:00	2	3	1	2	3	1	1	0	0	0	0	0	0	1	0	1	0	0	0	0	0	0	0	0	0	0	15
T/L04	NBSPE3	NBSPE3-04	Inoculated	2016-04-28	10:30:00	2	2	3	1	2	1	1	1	1	0	0	0	0	0	0	0	0	0	0	0	0	0	0	0	0	0	14
T/L05	NBSPE3	NBSPE3-05	Inoculated	2016-04-28	10:30:00	1	4	8	0	0	2	0	0	0	0	0	0	0	0	0	0	0	0	0	0	0	0	0	0	0	0	15
T/L06	NBSPE3	NBSPE3-06	Non-inoculated	2016-04-28	10:30:00	2	1	2	3	2	0	0	0	0	0	0	1	2	1	2	0	0	0	0	0	0	0	0	0	0	0	16
T/L07	NBSPE3	NBSPE3-07	Non-inoculated	2016-04-28	10:30:00	1	4	1	3	1	1	0	0	1	0	0	0	1	1	0	0	1	0	0	0	0	0	0	0	0	0	15
T/L08	NBSPE3	NBSPE3-08	Inoculated	2016-04-28	10:30:00	1	5	1	3	1	3	0	0	0	0	0	0	0	0	0	0	0	0	0	0	0	0	0	0	0	0	14
T/L09	NBKUR2	NBKUR2-01	Non-inoculated	2016-04-28	11:15:00	0	2	0	2	2	0	0	0	1	1	0	1	2	1	0	1	1	0	1	0	0	0	0	0	0	0	15
T/L10	NBKUR2	NBKUR2-02	Non-inoculated	2016-04-28	11:15:00	1	1	3	3	1	2	0	1	0	1	0	0	1	1	0	0	0	0	0	0	0	0	0	0	0	0	15
T/L11	NBKUR2	NBKUR2-03	Inoculated	2016-04-28	11:15:00	1	6	6	3	0	0	0	0	0	0	0	0	0	0	0	0	0	0	0	0	0	0	0	0	0	0	16
T/L12	NBKUR2	NBKUR2-04	Inoculated	2016-04-28	11:15:00	2	1	4	2	2	2	0	2	0	0	0	0	0	0	0	0	0	0	0	0	0	0	0	0	0	0	15
T/L13	NBKUR2	NBKUR2-05	Non-inoculated	2016-04-28	11:15:00	2	0	1	3	2	0	1	0	0	0	1	0	2	0	1	1	0	0	0	0	0	0	0	0	0	0	14
T/L14	NBKUR2	NBKUR2-06	Inoculated	2016-04-28	11:15:00	1	3	3	2	2	2	2	0	0	0	0	0	0	0	0	0	0	0	0	0	0	0	0	0	0	0	15
T/L15	NBKUR2	NBKUR2-07	Non-inoculated	2016-04-28	11:15:00	1	2	1	0	0	1	0	1	0	1	0	1	1	1	1	2	1	0	0	0	0	0	0	0	0	0	14
T/L16	NBKUR2	NBKUR2-08	Inoculated	2016-04-28	11:15:00	2	5	4	2	1	1	0	0	0	0	0	0	0	0	0	0	0	0	0	0	0	0	0	0	0	0	15
T/L17	NBJCU4	NBJCU4-01	Non-inoculated	2016-04-29	13:30:00	1	3	1	0	1	1	0	0	0	0	1	0	1	3	1	2	0	0	0	0	0	0	0	0	0	0	15
T/L18	NBJCU4	NBJCU4-02	Non-inoculated	2016-04-29	10:30:00	3	2	0	0	0	2	0	4	0	0	1	1	1	1	0	0	0	0	0	0	0	0	0	0	0	0	15
T/L19	NBJCU4	NBJCU4-03	Inoculated	2016-04-29	10:30:00	1	3	4	2	0	5	0	0	0	0	0	0	0	0	0	0	0	0	0	0	0	0	0	0	0	0	15
T/L20	NBJCU4	NBJCU4-04	Non-inoculated	2016-04-29	13:30:00	1	2	1	0	0	1	0	0	1	0	1	1	2	1	2	1	0	0	0	0	0	0	0	0	0	0	14
T/L21	NBJCU4	NBJCU4-05	Non-inoculated	2016-04-29	13:30:00	2	2	2	2	0	0	0	1	0	0	0	1	1	1	1	2	0	0	0	0	0	0	0	0	0	0	15
T/L22	NBJCU4	NBJCU4-06	Inoculated	2016-04-29	10:30:00	2	8	4	0	0	0	0	1	0	0	0	0	0	0	0	0	0	0	0	0	0	0	0	0	0	0	15
T/L23	NBJCU4	NBJCU4-07	Inoculated	2016-04-29	10:30:00	1	5	5	3	0	0	0	0	0	0	0	0	0	0	0	0	0	0	0	0	0	0	0	0	0	0	14
T/L24	NBJCU4	NBJCU4-08	Inoculated	2016-04-29	10:30:00	0	3	4	4	1	1	2	0	0	0	0	0	0	0	0	0	0	0	0	0	0	0	0	0	0	0	15
T/L25	NBKOA1	NBKOA1-01	Non-inoculated	2016-04-28	09:30:00	2	3	1	3	1	2	1	0	0	0	0	0	1	1	0	0	0	0	0	0	0	0	0	0	0	0	15
T/L26	NBKOA1	NBKOA1-02	Non-inoculated	2016-04-28	09:30:00	1	0	1	0	1	0	0	0	1	0	1	0	1	3	2	1	0	0	1	0	o	1	0	0	0	1	15
T/L27	NBKOA1	NBKOA1-03	Non-inoculated	2016-04-28	09:30:00	3	2	0	1	2	0	0	0	1	0	0	2	1	1	0	1	0	0	0	0	0	0	0	1	0	0	15
T/L28	NBKOA1	NBKOA1-04	Inoculated	2016-04-28	09:30:00	2	2	4	5	0	1	0	0	0	0	0	0	0	0	0	0	0	0	0	0	0	0	0	0	0	0	14
T/L29	NBKOA1	NBKOA1-05	Inoculated	2016-04-28	09:30:00	1	2	5	3	1	0	1	1	0	1	0	0	0	0	0	0	0	0	0	0	0	0	0	0	0	0	15
T/L30	NBKOA1	NBKOA1-06	Inoculated	2016-04-28	09:30:00	3	5	4	1	1	1	0	0	0	0	0	0	0	0	0	0	0	0	0	0	0	0	0	0	0	0	15
T/L31	NBKOA1	NBKOA1-07	Non-inoculated	2016-04-28	09:30:00	2	1	0	1	1	0	0	0	0	0	0	0	1	0	0	0	2	1	3	2	1	0	0	0	0	0	15
T/L32	NBKOA1	NBKOA1-08	Inoculated	2016-04-28	09:30:00	1	3	3	3	2	0	3	0	0	0	0	0	0	0	0	0	0	0	0	0	0	0	0	0	0	0	15
T/L33	NBKUR3	NBKUR3-01	Non-inoculated	2016-04-28	12:00:00	1	2	0	1	0	1	0	1	1	1	1	2	2	2	0	0	0	0	0	0	0	0	0	0	0	0	15
T/L34	NBKUR3	NBKUR3-02	Non-inoculated	2016-04-28	12:00:00	3	3	1	2	1	0	0	1	0	0	0	1	1	2	0	0	0	0	0	0	0	0	0	0	0	0	15
T/L35	NBKUR3	NBKUR3-03	Non-inoculated	2016-04-28	12:00:00	3	1	1	4	2	0	0	0	0	0	0	1	1	0	0	2	0	0	0	0	0	0	0	0	0	0	15
T/L36	NBKUR3	NBKUR3-04	Inoculated	2016-04-28	12:00:00	3	2	3	5	1	1	0	0	0	0	0	0	0	0	0	0	0	0	0	0	0	0	0	0	0	0	15
T/L37	NBKUR3	NBKUR3-05	Inoculated	2016-04-28	12:00:00	3	3	5	5	0	0	0	0	0	0	0	0	0	0	0	0	0	0	0	0	0	0	0	0	0	0	16
T/L38	NBKUR3	NBKUR3-06	Inoculated	2016-04-28	12:00:00	1	3	4	5	1	1	0	0	0	0	0	0	0	0	0	0	0	0	0	0	0	0	0	0	0	0	15
T/L39	NBKUR3	NBKUR3-07	Non-inoculated	2016-04-28	12:00:00	1	3	3	0	3	0	0	1	1	0	0	0	1	0	1	1	0	0	0	0	0	0	0	0	0	0	15
T/L40	NBKUR3	NBKUR3-08	Inoculated	2016-04-28	12:00:00	2	4	5	3	1	0	0	0	0	0	0	0	0	0	0	0	0	0	0	0	0	0	0	0	0	0	15
T/L41	NBCAV1	NBCAV1-01	Inoculated	2016-04-28	14:00:00	3	2	4	5	1	0	0	0	0	0	0	0	0	0	0	0	0	0	0	0	0	0	0	0	0	0	15
T/L42	NBCAV1	NBCAV1-02	Inoculated	2016-04-28	14:00:00	4	1	4	4	1	0	0	0	0	0	0	0	0	0	0	0	0	0	0	0	0	0	0	0	0	0	14
T/L43	NBCAV1	NBCAV1-03	Non-inoculated	2016-04-28	14:00:00	1	4	5	4	0	0	0	1	0	0	0	0	0	0	0	0	0	0	0	0	0	0	0	0	0	0	15
T/L44	NBCAV1	NBCAV1-04	Inoculated	2016-04-28	14:00:00	3	3	3	4	2	0	0	0	0	0	0	0	0	0	0	0	0	0	0	0	0	0	0	0	0	0	15
T/L45	NBCAV1	NBCAV1-05	Non-inoculated	2016-04-28	14:00:00	1	3	5	1	1	0	0	1	1	0	1	0	0	0	1	0	0	0	0	0	0	0	0	0	0	0	15
T/L46	NBCAV1	NBCAV1-06	Inoculated	2016-04-28	14:00:00	2	5	5	1	1	0	1	0	0	0	0	0	0	0	0	0	0	0	0	0	0	0	0	0	0	0	15
T/L47	NBCAV1	NBCAV1-07	Non-inoculated	2016-04-28	14:00:00	2	5	4	2	2	0	0	0	0	0	0	0	0	0	0	0	0	0	0	0	0	0	0	0	0	0	15
T/L48	NBCAV1	NBCAV1-08	Non-inoculated	2016-04-28	14:00:00	1	3	3	1	1	0	0	1	1	0	1	0	1	0	1	0	0	0	0	0	0	0	0	0	0	0	14

## Sheet: BEE based data_2
UniqueID	Unique_Row_Number	Day_bee_died_post_infection	Censored	ID	Hive_of_Origin	Cage	Trt_Group	Trt_Group_0_1	Collection_Date	Collection_time	Spore_count_date	minitube_lable	Infection_present_Y_N	Infection_present_0_1	mean	SDrep1	sum1rep1	count11	count12	count13	count14	count15	sum2rep1	count21	count22	count23	count24	count25		sum_spore_count	total_spores
1	1	PI01	0	T/L01	NBSPE3	NBSPE3-01	Non-inoculated	0	2016-04-28	10:30:00	2016-05-05	01-1-5/5	N	0	0	0	0	0	0	0	0	0	0	0	0	0	0	0		0	0
2	2	PI02	0	T/L01	NBSPE3	NBSPE3-01	Non-inoculated	0	2016-04-28	10:30:00	2016-05-05	01-2-5/5	Y	1	4.5	2.12132	6	0	2	1	1	2	3	0	1	1	0	1		9	9000
3	3	PI02	0	T/L01	NBSPE3	NBSPE3-01	Non-inoculated	0	2016-04-28	10:30:00	2016-05-05	01-3-5/5	N	0	0	0	0	0	0	0	0	0	0	0	0	0	0	0		0	0
4	4	PI02	0	T/L01	NBSPE3	NBSPE3-01	Non-inoculated	0	2016-04-28	10:30:00	2016-05-14	01-4-14/5	N	0	0	0	0	0	0	0	0	0	0	0	0	0	0	0		0	0
5	5	PI02	0	T/L01	NBSPE3	NBSPE3-01	Non-inoculated	0	2016-04-28	10:30:00	2016-05-14	01-5-14/5	N	0	0	0	0	0	0	0	0	0	0	0	0	0	0	0		0	0
6	6	PI03	0	T/L01	NBSPE3	NBSPE3-01	Non-inoculated	0	2016-04-28	10:30:00	2016-05-14	01-6-14/5	N	0	0	0	0	0	0	0	0	0	0	0	0	0	0	0		0	0
7	7	PI03	0	T/L01	NBSPE3	NBSPE3-01	Non-inoculated	0	2016-04-28	10:30:00	2016-05-20	01-7-20/5	N	0	0	0	0	0	0	0	0	0	0	0	0	0	0	0		0	0
8	8	PI04	0	T/L01	NBSPE3	NBSPE3-01	Non-inoculated	0	2016-04-28	10:30:00	2016-05-20	01-8-20/5	N	0	0	0	0	0	0	0	0	0	0	0	0	0	0	0		0	0
9	9	PI04	0	T/L01	NBSPE3	NBSPE3-01	Non-inoculated	0	2016-04-28	10:30:00	2016-05-20	01-9-20/5	N	0	0	0	0	0	0	0	0	0	0	0	0	0	0	0		0	0
10	10	PI05	0	T/L01	NBSPE3	NBSPE3-01	Non-inoculated	0	2016-04-28	10:30:00	2016-05-20	01-10-20/5	N	0	0	0	0	0	0	0	0	0	0	0	0	0	0	0		0	0
11	11	PI05	0	T/L01	NBSPE3	NBSPE3-01	Non-inoculated	0	2016-04-28	10:30:00	2016-05-20	01-11-20/5	N	0	0	0	0	0	0	0	0	0	0	0	0	0	0	0		0	0
12	12	PI07	0	T/L01	NBSPE3	NBSPE3-01	Non-inoculated	0	2016-04-28	10:30:00	2016-05-22	01-12-22/5	N	0	0	0	0	0	0	0	0	0	0	0	0	0	0	0		0	0
13	13	PI13	0	T/L01	NBSPE3	NBSPE3-01	Non-inoculated	0	2016-04-28	10:30:00	2016-05-22	01-13-22/5	N	0	0	0	0	0	0	0	0	0	0	0	0	0	0	0		0	0
14	14	PI15	0	T/L01	NBSPE3	NBSPE3-01	Non-inoculated	0	2016-04-28	10:30:00	2016-05-22	01-14-22/5	N	0	0	0	0	0	0	0	0	0	0	0	0	0	0	0		0	0
15	15	PI16	0	T/L01	NBSPE3	NBSPE3-01	Non-inoculated	0	2016-04-28	10:30:00	2016-05-22	01-15-22/5	N	0	0	0	0	0	0	0	0	0	0	0	0	0	0	0		0	0
16	1	PI01	0	T/L02	NBSPE3	NBSPE3-02	Inoculated	1	2016-04-28	10:30:00	2016-05-20	02-1-20/5	N	0	0	0	0	0	0	0	0	0	0	0	0	0	0	0		0	0
17	2	PI01	0	T/L02	NBSPE3	NBSPE3-02	Inoculated	1	2016-04-28	10:30:00	2016-05-20	02-2-20/5	N	0	0	0	0	0	0	0	0	0	0	0	0	0	0	0		0	0
18	3	PI02	0	T/L02	NBSPE3	NBSPE3-02	Inoculated	1	2016-04-28	10:30:00	2016-05-20	02-3-20/5	N	0	0	0	0	0	0	0	0	0	0	0	0	0	0	0		0	0
19	4	PI02	0	T/L02	NBSPE3	NBSPE3-02	Inoculated	1	2016-04-28	10:30:00	2016-05-21	02-4-21/5	N	0	0	0	0	0	0	0	0	0	0	0	0	0	0	0		0	0
20	5	PI03	0	T/L02	NBSPE3	NBSPE3-02	Inoculated	1	2016-04-28	10:30:00	2016-05-21	02-5-21/5	Y	1	22	1.41421	23	5	4	5	6	3	21	3	4	5	3	6		44	44000
21	6	PI03	0	T/L02	NBSPE3	NBSPE3-02	Inoculated	1	2016-04-28	10:30:00	2016-05-21	02-6-21/5	Y	1	30	7.07107	35	5	11	6	7	6	25	5	6	4	5	5		60	60000
22	7	PI03	0	T/L02	NBSPE3	NBSPE3-02	Inoculated	1	2016-04-28	10:30:00	2016-05-21	02-7-21/5	Y	1	29	5.65685	33	5	9	6	6	7	25	4	5	6	5	5		58	58000
23	8	PI03	0	T/L02	NBSPE3	NBSPE3-02	Inoculated	1	2016-04-28	10:30:00	2016-05-21	02-8-21/5	Y	1	35.5	7.77817	41	7	8	6	9	11	30	7	6	7	7	3		71	71000
24	9	PI03	0	T/L02	NBSPE3	NBSPE3-02	Inoculated	1	2016-04-28	10:30:00	2016-05-21	02-9-21/5	Y	1	35.5	12.0208	44	8	11	9	9	7	27	6	9	4	5	3		71	71000
25	10	PI03	0	T/L02	NBSPE3	NBSPE3-02	Inoculated	1	2016-04-28	10:30:00	2016-05-21	02-10-21/5	Y	1	28	4.24264	31	6	6	7	8	4	25	4	5	5	8	3		56	56000
26	11	PI04	0	T/L02	NBSPE3	NBSPE3-02	Inoculated	1	2016-04-28	10:30:00	2016-05-21	02-11-21/5	Y	1	27.5	0.707107	28	5	6	5	6	6	27	4	6	5	6	6		55	55000
27	12	PI04	0	T/L02	NBSPE3	NBSPE3-02	Inoculated	1	2016-04-28	10:30:00	2016-05-21	02-12-21/5	N	0	0	0	0	0	0	0	0	0	0	0	0	0	0	0		0	0
28	13	PI04	0	T/L02	NBSPE3	NBSPE3-02	Inoculated	1	2016-04-28	10:30:00	2016-05-21	02-13-21/5	N	0	0	0	0	0	0	0	0	0	0	0	0	0	0	0		0	0
29	14	PI05	0	T/L02	NBSPE3	NBSPE3-02	Inoculated	1	2016-04-28	10:30:00	2016-05-21	02-14-21/5	N	0	0	0	0	0	0	0	0	0	0	0	0	0	0	0		0	0
30	15	PI05	0	T/L02	NBSPE3	NBSPE3-02	Inoculated	1	2016-04-28	10:30:00	2016-05-21	02-15-21/5	Y	1	17	1.41421	18	4	3	3	5	3	16	5	3	2	3	3		34	34000
31	1	PI01	0	T/L03	NBSPE3	NBSPE3-03	Non-inoculated	0	2016-04-28	10:30:00	2016-05-05	03-1-5/5	N	0	0	0	0	0	0	0	0	0	0	0	0	0	0	0		0	0
32	2	PI01	0	T/L03	NBSPE3	NBSPE3-03	Non-inoculated	0	2016-04-28	10:30:00	2016-05-05	03-2-5/5	N	0	0	0	0	0	0	0	0	0	0	0	0	0	0	0		0	0
33	3	PI02	0	T/L03	NBSPE3	NBSPE3-03	Non-inoculated	0	2016-04-28	10:30:00	2016-05-05	03-3-5/5	N	0	0	0	0	0	0	0	0	0	0	0	0	0	0	0		0	0
34	4	PI02	0	T/L03	NBSPE3	NBSPE3-03	Non-inoculated	0	2016-04-28	10:30:00	2016-05-05	03-4-5/5	N	0	0	0	0	0	0	0	0	0	0	0	0	0	0	0		0	0
35	5	PI02	0	T/L03	NBSPE3	NBSPE3-03	Non-inoculated	0	2016-04-28	10:30:00	2016-05-12	03-5-12/5	Y	1	13.5	4.94975	17	4	3	1	5	4	10	3	1	1	2	3		27	27000
36	6	PI03	0	T/L03	NBSPE3	NBSPE3-03	Non-inoculated	0	2016-04-28	10:30:00	2016-05-12	03-6-12/5	Y	1	10.5	3.53553	13	1	4	1	4	3	8	1	4	1	1	1		21	21000
37	7	PI04	0	T/L03	NBSPE3	NBSPE3-03	Non-inoculated	0	2016-04-28	10:30:00	2016-05-12	03-7-12/5	N	0	0	0	0	0	0	0	0	0	0	0	0	0	0	0		0	0
38	8	PI04	0	T/L03	NBSPE3	NBSPE3-03	Non-inoculated	0	2016-04-28	10:30:00	2016-05-12	03-8-12/5	N	0	0	0	0	0	0	0	0	0	0	0	0	0	0	0		0	0
39	9	PI05	0	T/L03	NBSPE3	NBSPE3-03	Non-inoculated	0	2016-04-28	10:30:00	2016-05-12	03-9-12/5	N	0	0	0	0	0	0	0	0	0	0	0	0	0	0	0		0	0
40	10	PI05	0	T/L03	NBSPE3	NBSPE3-03	Non-inoculated	0	2016-04-28	10:30:00	2016-05-12	03-10-12/5	N	0	0	0	0	0	0	0	0	0	0	0	0	0	0	0		0	0
41	11	PI05	0	T/L03	NBSPE3	NBSPE3-03	Non-inoculated	0	2016-04-28	10:30:00	2016-05-12	03-11-12/5	N	0	0	0	0	0	0	0	0	0	0	0	0	0	0	0		0	0
42	12	PI06	0	T/L03	NBSPE3	NBSPE3-03	Non-inoculated	0	2016-04-28	10:30:00	2016-05-12	03-12-12/5	N	0	0	0	0	0	0	0	0	0	0	0	0	0	0	0		0	0
43	13	PI07	0	T/L03	NBSPE3	NBSPE3-03	Non-inoculated	0	2016-04-28	10:30:00	2016-05-12	03-13-12/5	N	0	0	0	0	0	0	0	0	0	0	0	0	0	0	0		0	0
44	14	PI14	0	T/L03	NBSPE3	NBSPE3-03	Non-inoculated	0	2016-04-28	10:30:00	2016-05-12	03-14-12/5	N	0	0	0	0	0	0	0	0	0	0	0	0	0	0	0		0	0
45	15	PI16	0	T/L03	NBSPE3	NBSPE3-03	Non-inoculated	0	2016-04-28	10:30:00	2016-05-14	03-15-14/5	N	0	0	0	0	0	0	0	0	0	0	0	0	0	0	0		0	0
46	1	PI01	0	T/L04	NBSPE3	NBSPE3-04	Inoculated	1	2016-04-28	10:30:00	2016-05-20	04-1-20/5	Y	1	16	1.41421	17	3	2	2	7	3	15	2	4	2	4	3		32	32000
47	2	PI01	0	T/L04	NBSPE3	NBSPE3-04	Inoculated	1	2016-04-28	10:30:00	2016-05-20	04-2-20/5	Y	1	10.5	2.12132	12	4	2	4	1	1	9	1	1	3	2	2		21	21000
48	3	PI02	0	T/L04	NBSPE3	NBSPE3-04	Inoculated	1	2016-04-28	10:30:00	2016-05-20	04-3-20/5	Y	1	23	2.82843	21	6	3	4	5	3	25	4	7	4	6	4		46	46000
49	4	PI02	0	T/L04	NBSPE3	NBSPE3-04	Inoculated	1	2016-04-28	10:30:00	2016-05-21	04-4-21/5	N	0	0	0	0	0	0	0	0	0	0	0	0	0	0	0		0	0
50	5	PI03	0	T/L04	NBSPE3	NBSPE3-04	Inoculated	1	2016-04-28	10:30:00	2016-05-21	04-5-21/5	Y	1	30	5.65685	34	9	7	5	8	5	26	5	4	6	5	6		60	60000
51	6	PI03	0	T/L04	NBSPE3	NBSPE3-04	Inoculated	1	2016-04-28	10:30:00	2016-05-21	04-6-21/5	Y	1	21.5	0.707107	22	5	5	3	5	4	21	1	5	4	6	5		43	43000
52	7	PI03	0	T/L04	NBSPE3	NBSPE3-04	Inoculated	1	2016-04-28	10:30:00	2016-05-05	04-7-5/5	Y	1	17.5	14.8492	28	8	6	4	2	8	7	6	7	7	7	3		35	35000
53	8	PI04	0	T/L04	NBSPE3	NBSPE3-04	Inoculated	1	2016-04-28	10:30:00	2016-05-05	04-8-5/5	Y	1	11	12.7279	20	8	3	3	4	2	2	2	2	2	1	1		22	22000
54	9	PI05	0	T/L04	NBSPE3	NBSPE3-04	Inoculated	1	2016-04-28	10:30:00	2016-05-21	04-9-21/5	N	0	0	0	0	0	0	0	0	0	0	0	0	0	0	0		0	0
55	10	PI05	0	T/L04	NBSPE3	NBSPE3-04	Inoculated	1	2016-04-28	10:30:00	2016-05-21	04-10-21/5	N	0	0	0	0	0	0	0	0	0	0	0	0	0	0	0		0	0
56	11	PI06	0	T/L04	NBSPE3	NBSPE3-04	Inoculated	1	2016-04-28	10:30:00	2016-05-21	04-11-21/5	N	0	0	0	0	0	0	0	0	0	0	0	0	0	0	0		0	0
57	12	PI07	0	T/L04	NBSPE3	NBSPE3-04	Inoculated	1	2016-04-28	10:30:00	2016-05-21	04-12-21/5	N	0	0	0	0	0	0	0	0	0	0	0	0	0	0	0		0	0
58	13	PI08	0	T/L04	NBSPE3	NBSPE3-04	Inoculated	1	2016-04-28	10:30:00	2016-05-21	04-13-21/5	Y	1	53	14.1421	63	7	11	19	17	9	43	9	10	8	7	9		106	106000
59	14	PI09	0	T/L04	NBSPE3	NBSPE3-04	Inoculated	1	2016-04-28	10:30:00	2016-05-21	04-14-21/5	Y	1	19.5	0.707107	20	5	3	6	2	4	19	4	6	2	4	3		39	39000
60	15	PI0	1	T/L04	NBSPE3	NBSPE3-04	Inoculated	1	2016-04-28	10:30:00					0	0	0	0	0	0	0	0	0	0	0	0	0	0		0	0
61	1	PI01	0	T/L05	NBSPE3	NBSPE3-05	Inoculated	1	2016-04-28	10:30:00	2016-05-20	05-1-20/5	Y	1	29.5	4.94975	33	8	3	9	7	6	26	6	6	6	5	3		59	59000
62	2	PI02	0	T/L05	NBSPE3	NBSPE3-05	Inoculated	1	2016-04-28	10:30:00	2016-05-20	05-2-20/5	Y	1	19	1.41421	18	4	5	1	6	2	20	4	2	5	5	4		38	38000
63	3	PI02	0	T/L05	NBSPE3	NBSPE3-05	Inoculated	1	2016-04-28	10:30:00	2016-05-20	05-3-20/5	Y	1	23.5	0.707107	23	8	5	3	4	3	24	8	5	6	2	3		47	47000
64	4	PI02	0	T/L05	NBSPE3	NBSPE3-05	Inoculated	1	2016-04-28	10:30:00	2016-05-21	05-4-21/5	N	0	0	0	0	0	0	0	0	0	0	0	0	0	0	0		0	0
65	5	PI02	0	T/L05	NBSPE3	NBSPE3-05	Inoculated	1	2016-04-28	10:30:00	2016-05-21	05-5-21/5	N	0	0	0	0	0	0	0	0	0	0	0	0	0	0	0		0	0
66	6	PI03	0	T/L05	NBSPE3	NBSPE3-05	Inoculated	1	2016-04-28	10:30:00	2016-05-21	05-6-21/5	Y	1	27	7.07107	22	4	3	5	6	4	32	9	6	7	5	5		54	54000
67	7	PI03	0	T/L05	NBSPE3	NBSPE3-05	Inoculated	1	2016-04-28	10:30:00	2016-05-21	05-7-21/5	Y	1	31	11.3137	39	8	6	9	5	11	23	4	3	5	6	5		62	62000
68	8	PI03	0	T/L05	NBSPE3	NBSPE3-05	Inoculated	1	2016-04-28	10:30:00	2016-05-21	05-8-21/5	Y	1	29	2.82843	27	5	7	4	6	5	31	9	5	6	5	6		58	58000
69	9	PI03	0	T/L05	NBSPE3	NBSPE3-05	Inoculated	1	2016-04-28	10:30:00	2016-05-21	05-9-21/5	Y	1	21	4.24264	24	5	6	5	4	4	18	4	3	4	5	2		42	42000
70	10	PI03	0	T/L05	NBSPE3	NBSPE3-05	Inoculated	1	2016-04-28	10:30:00	2016-05-21	05-10-21/5	Y	1	22	5.65685	26	6	11	4	3	2	18	11	3	2	1	1		44	44000
71	11	PI03	0	T/L05	NBSPE3	NBSPE3-05	Inoculated	1	2016-04-28	10:30:00	2016-05-21	05-11-21/5	Y	1	15.5	0.707107	15	3	4	3	2	3	16	2	3	2	5	4		31	31000
72	12	PI03	0	T/L05	NBSPE3	NBSPE3-05	Inoculated	1	2016-04-28	10:30:00	2016-05-21	05-12-21/5	Y	1	20	7.07107	25	6	5	9	3	2	15	2	3	4	5	1		40	40000
73	13	PI03	0	T/L05	NBSPE3	NBSPE3-05	Inoculated	1	2016-04-28	10:30:00	2016-05-21	05-13-21/5	Y	1	19.5	4.94975	16	6	4	3	2	1	23	17	0	3	2	1		39	39000
74	14	PI06	0	T/L05	NBSPE3	NBSPE3-05	Inoculated	1	2016-04-28	10:30:00	2016-05-21	05-14-21/5	Y	1	19	5.65685	23	6	4	5	5	3	15	3	4	4	1	3		38	38000
75	15	PI06	0	T/L05	NBSPE3	NBSPE3-05	Inoculated	1	2016-04-28	10:30:00	2016-05-21	05-15-21/5	N	0	0	0	0	0	0	0	0	0	0	0	0	0	0	0		0	0
76	1	PI01	0	T/L06	NBSPE3	NBSPE3-06	Non-inoculated	0	2016-04-28	10:30:00	2016-05-11	06-1-11/5	Y	1	2	1.41421	3	2	0	1	0	0	1	0	1	0	0	0		4	4000
77	2	PI01	0	T/L06	NBSPE3	NBSPE3-06	Non-inoculated	0	2016-04-28	10:30:00	2016-05-11	06-2-11/5	N	0	0	0	0	0	0	0	0	0	0	0	0	0	0	0		0	0
78	3	PI02	0	T/L06	NBSPE3	NBSPE3-06	Non-inoculated	0	2016-04-28	10:30:00	2016-05-11	06-3-11/5	N	0	0	0	0	0	0	0	0	0	0	0	0	0	0	0		0	0
79	4	PI03	0	T/L06	NBSPE3	NBSPE3-06	Non-inoculated	0	2016-04-28	10:30:00	2016-05-11	06-4-11/5	N	0	0	0	0	0	0	0	0	0	0	0	0	0	0	0		0	0
80	5	PI03	0	T/L06	NBSPE3	NBSPE3-06	Non-inoculated	0	2016-04-28	10:30:00	2016-05-11	06-5-11/5	N	0	0	0	0	0	0	0	0	0	0	0	0	0	0	0		0	0
81	6	PI04	0	T/L06	NBSPE3	NBSPE3-06	Non-inoculated	0	2016-04-28	10:30:00	2016-06-28	06-6-28/6	N	0	0	0	0	0	0	0	0	0	0	0	0	0	0	0		0	0
82	7	PI04	0	T/L06	NBSPE3	NBSPE3-06	Non-inoculated	0	2016-04-28	10:30:00	2016-05-20	06-7-20/5	N	0	0	0	0	0	0	0	0	0	0	0	0	0	0	0		0	0
83	8	PI04	0	T/L06	NBSPE3	NBSPE3-06	Non-inoculated	0	2016-04-28	10:30:00	2016-05-20	06-8-20/5	N	0	0	0	0	0	0	0	0	0	0	0	0	0	0	0		0	0
84	9	PI05	0	T/L06	NBSPE3	NBSPE3-06	Non-inoculated	0	2016-04-28	10:30:00	2016-05-20	06-9-20/5	N	0	0	0	0	0	0	0	0	0	0	0	0	0	0	0		0	0
85	10	PI05	0	T/L06	NBSPE3	NBSPE3-06	Non-inoculated	0	2016-04-28	10:30:00	2016-05-22	06-10-22/5	N	0	0	0	0	0	0	0	0	0	0	0	0	0	0	0		0	0
86	11	PI12	0	T/L06	NBSPE3	NBSPE3-06	Non-inoculated	0	2016-04-28	10:30:00	2016-05-22	06-11-22/5	N	0	0	0	0	0	0	0	0	0	0	0	0	0	0	0		0	0
87	12	PI13	0	T/L06	NBSPE3	NBSPE3-06	Non-inoculated	0	2016-04-28	10:30:00	2016-05-22	06-12-22/5	N	0	0	0	0	0	0	0	0	0	0	0	0	0	0	0		0	0
88	13	PI13	0	T/L06	NBSPE3	NBSPE3-06	Non-inoculated	0	2016-04-28	10:30:00	2016-05-22	06-13-22/5	N	0	0	0	0	0	0	0	0	0	0	0	0	0	0	0		0	0
89	14	PI14	0	T/L06	NBSPE3	NBSPE3-06	Non-inoculated	0	2016-04-28	10:30:00	2016-05-22	06-14-22/5	N	0	0	0	0	0	0	0	0	0	0	0	0	0	0	0		0	0
90	15	PI15	0	T/L06	NBSPE3	NBSPE3-06	Non-inoculated	0	2016-04-28	10:30:00	2016-05-22	06-15-22/5	N	0	0	0	0	0	0	0	0	0	0	0	0	0	0	0		0	0
91	16	PI15	0	T/L06	NBSPE3	NBSPE3-06	Non-inoculated	0	2016-04-28	10:30:00	2016-05-22	06-15-22/5	N	0	0	0	0	0	0	0	0	0	0	0	0	0	0	0		0	0
92	1	PI01	0	T/L07	NBSPE3	NBSPE3-07	Non-inoculated	0	2016-04-28	10:30:00	2016-05-13	07-1-13/5	N	0	0	0	0	0	0	0	0	0	0	0	0	0	0	0		0	0
93	2	PI02	0	T/L07	NBSPE3	NBSPE3-07	Non-inoculated	0	2016-04-28	10:30:00	2016-05-13	07-2-13/5	N	0	0	0	0	0	0	0	0	0	0	0	0	0	0	0		0	0
94	3	PI02	0	T/L07	NBSPE3	NBSPE3-07	Non-inoculated	0	2016-04-28	10:30:00	2016-05-13	07-3-13/5	Y	1	3	1.41421	4	2	0	2	0	0	2	1	0	1	0	0		6	6000
95	4	PI02	0	T/L07	NBSPE3	NBSPE3-07	Non-inoculated	0	2016-04-28	10:30:00	2016-05-13	07-4-13/5	N	0	0	0	0	0	0	0	0	0	0	0	0	0	0	0		0	0
96	5	PI02	0	T/L07	NBSPE3	NBSPE3-07	Non-inoculated	0	2016-04-28	10:30:00	2016-05-13	07-5-13/5	N	0	0	0	0	0	0	0	0	0	0	0	0	0	0	0		0	0
97	6	PI03	0	T/L07	NBSPE3	NBSPE3-07	Non-inoculated	0	2016-04-28	10:30:00	2016-05-13	07-6-13/5	Y	1	0.5	0.707107	1	0	0	0	1	0	0	0	0	0	0	0		1	1000
98	7	PI04	0	T/L07	NBSPE3	NBSPE3-07	Non-inoculated	0	2016-04-28	10:30:00	2016-05-13	07-7-13/5	N	0	0	0	0	0	0	0	0	0	0	0	0	0	0	0		0	0
99	8	PI04	0	T/L07	NBSPE3	NBSPE3-07	Non-inoculated	0	2016-04-28	10:30:00	2016-05-13	07-8-13/5	N	0	0	0	0	0	0	0	0	0	0	0	0	0	0	0		0	0
100	9	PI04	0	T/L07	NBSPE3	NBSPE3-07	Non-inoculated	0	2016-04-28	10:30:00	2016-05-17	07-9-17/5	Y	1	1	1.41421	0	0	0	0	0	0	2	0	1	0	1	0		2	2000
101	10	PI05	0	T/L07	NBSPE3	NBSPE3-07	Non-inoculated	0	2016-04-28	10:30:00	2016-05-17	07-10-17/5	N	0	0	0	0	0	0	0	0	0	0	0	0	0	0	0		0	0
102	11	PI06	0	T/L07	NBSPE3	NBSPE3-07	Non-inoculated	0	2016-04-28	10:30:00	2016-05-17	07-11-17/5	N	0	0	0	0	0	0	0	0	0	0	0	0	0	0	0		0	0
103	12	PI09	0	T/L07	NBSPE3	NBSPE3-07	Non-inoculated	0	2016-04-28	10:30:00	2016-05-20	07-12-20/5	N	0	0	0	0	0	0	0	0	0	0	0	0	0	0	0		0	0
104	13	PI13	0	T/L07	NBSPE3	NBSPE3-07	Non-inoculated	0	2016-04-28	10:30:00	2016-05-20	07-13-20/5	N	0	0	0	0	0	0	0	0	0	0	0	0	0	0	0		0	0
105	14	PI14	0	T/L07	NBSPE3	NBSPE3-07	Non-inoculated	0	2016-04-28	10:30:00	2016-05-22	07-14-22/5	N	0	0	0	0	0	0	0	0	0	0	0	0	0	0	0		0	0
106	15	PI17	0	T/L07	NBSPE3	NBSPE3-07	Non-inoculated	0	2016-04-28	10:30:00	2016-05-22	07-15-22/5	N	0	0	0	0	0	0	0	0	0	0	0	0	0	0	0		0	0
107	1	PI01	0	T/L08	NBSPE3	NBSPE3-08	Inoculated	1	2016-04-28	10:30:00	2016-05-20	08-1-20/5	Y	1	24	2.82843	26	9	6	3	5	3	22	3	3	7	5	4		48	48000
108	2	PI02	0	T/L08	NBSPE3	NBSPE3-08	Inoculated	1	2016-04-28	10:30:00	2016-05-14	08-2-14/5	Y	1	52.5	6.36396	48	13	6	13	10	6	57	10	11	12	13	11		105	105000
109	3	PI02	0	T/L08	NBSPE3	NBSPE3-08	Inoculated	1	2016-04-28	10:30:00	2016-05-20	08-3-20/5	Y	1	26	4.24264	29	5	9	5	6	4	23	4	4	3	6	6		52	52000
110	4	PI02	0	T/L08	NBSPE3	NBSPE3-08	Inoculated	1	2016-04-28	10:30:00	2016-05-21	08-4-21/5	Y	1	34	14.1421	44	16	3	8	8	9	24	5	3	7	5	4		68	68000
111	5	PI02	0	T/L08	NBSPE3	NBSPE3-08	Inoculated	1	2016-04-28	10:30:00	2016-05-21	08-5-21/5	Y	1	35.5	2.12132	37	8	5	9	11	4	34	4	3	11	11	5		71	71000
112	6	PI02	0	T/L08	NBSPE3	NBSPE3-08	Inoculated	1	2016-04-28	10:30:00	2016-05-21	08-6-21/5	Y	1	32	4.24264	29	5	6	5	4	9	35	6	7	9	9	4		64	64000
113	7	PI03	0	T/L08	NBSPE3	NBSPE3-08	Inoculated	1	2016-04-28	10:30:00	2016-05-21	08-7-21/5	Y	1	31	5.65685	35	6	5	8	8	8	27	8	5	6	6	2		62	62000
114	8	PI04	0	T/L08	NBSPE3	NBSPE3-08	Inoculated	1	2016-04-28	10:30:00	2016-05-21	08-8-21/5	N	0	0	0	0	0	0	0	0	0	0	0	0	0	0	0		0	0
115	9	PI04	0	T/L08	NBSPE3	NBSPE3-08	Inoculated	1	2016-04-28	10:30:00	2016-05-22	08-9-22/5	Y	1	27	4.24264	30	6	8	5	6	5	24	6	2	3	9	4		54	54000
116	10	PI04	0	T/L08	NBSPE3	NBSPE3-08	Inoculated	1	2016-04-28	10:30:00	2016-05-21	08-10-21/5	N	0	0	0	0	0	0	0	0	0	0	0	0	0	0	0		0	0
117	11	PI05	0	T/L08	NBSPE3	NBSPE3-08	Inoculated	1	2016-04-28	10:30:00	2016-05-03	08-11-3/5	N	0	0	0	0	0	0	0	0	0	0	0	0	0	0	0		0	0
118	12	PI06	0	T/L08	NBSPE3	NBSPE3-08	Inoculated	1	2016-04-28	10:30:00	2016-05-21	08-12-21/5	N	0	0	0	0	0	0	0	0	0	0	0	0	0	0	0		0	0
119	13	PI06	0	T/L08	NBSPE3	NBSPE3-08	Inoculated	1	2016-04-28	10:30:00	2016-05-22	08-13-22/5	Y	1	26	1.41421	25	6	6	4	6	3	27	5	6	5	4	7		52	52000
120	14	PI06	0	T/L08	NBSPE3	NBSPE3-08	Inoculated	1	2016-04-28	10:30:00	2016-05-21	08-14-21/5	N	0	0	0	0	0	0	0	0	0	0	0	0	0	0	0		0	0
121	15	PI0	1	T/L08	NBSPE3	NBSPE3-08	Inoculated	1	2016-04-28	10:30:00					0	0	0	0	0	0	0	0	0	0	0	0	0	0		0	0
122	1	PI02	0	T/L09	NBKUR2	NBKUR2-01	Non-inoculated	0	2016-04-28	11:15:00	2016-05-17	09-1-17/5	N	0	0	0	0	0	0	0	0	0	0	0	0	0	0	0		0	0
123	2	PI02	0	T/L09	NBKUR2	NBKUR2-01	Non-inoculated	0	2016-04-28	11:15:00	2016-05-17	09-2-17/5	N	0	0	0	0	0	0	0	0	0	0	0	0	0	0	0		0	0
124	3	PI04	0	T/L09	NBKUR2	NBKUR2-01	Non-inoculated	0	2016-04-28	11:15:00	2016-05-20	09-3-20/5	N	0	0	0	0	0	0	0	0	0	0	0	0	0	0	0		0	0
125	4	PI04	0	T/L09	NBKUR2	NBKUR2-01	Non-inoculated	0	2016-04-28	11:15:00	2016-05-20	09-4-20/5	N	0	0	0	0	0	0	0	0	0	0	0	0	0	0	0		0	0
126	5	PI05	0	T/L09	NBKUR2	NBKUR2-01	Non-inoculated	0	2016-04-28	11:15:00	2016-05-22	09-5-22/5	N	0	0	0	0	0	0	0	0	0	0	0	0	0	0	0		0	0
127	6	PI05	0	T/L09	NBKUR2	NBKUR2-01	Non-inoculated	0	2016-04-28	11:15:00	2016-05-22	09-6-22/5	N	0	0	0	0	0	0	0	0	0	0	0	0	0	0	0		0	0
128	7	PI09	0	T/L09	NBKUR2	NBKUR2-01	Non-inoculated	0	2016-04-28	11:15:00	2016-05-22	09-7-22/5	N	0	0	0	0	0	0	0	0	0	0	0	0	0	0	0		0	0
129	8	PI10	0	T/L09	NBKUR2	NBKUR2-01	Non-inoculated	0	2016-04-28	11:15:00	2016-05-22	09-8-22/5	N	0	0	0	0	0	0	0	0	0	0	0	0	0	0	0		0	0
130	9	PI12	0	T/L09	NBKUR2	NBKUR2-01	Non-inoculated	0	2016-04-28	11:15:00	2016-05-22	09-9-22/5	N	0	0	0	0	0	0	0	0	0	0	0	0	0	0	0		0	0
131	10	PI13	0	T/L09	NBKUR2	NBKUR2-01	Non-inoculated	0	2016-04-28	11:15:00	2016-05-22	09-10-22/5	N	0	0	0	0	0	0	0	0	0	0	0	0	0	0	0		0	0
132	11	PI13	0	T/L09	NBKUR2	NBKUR2-01	Non-inoculated	0	2016-04-28	11:15:00	2016-05-22	09-11-22/5	N	0	0	0	0	0	0	0	0	0	0	0	0	0	0	0		0	0
133	12	PI14	0	T/L09	NBKUR2	NBKUR2-01	Non-inoculated	0	2016-04-28	11:15:00	2016-05-22	09-12-22/5	N	0	0	0	0	0	0	0	0	0	0	0	0	0	0	0		0	0
134	13	PI16	0	T/L09	NBKUR2	NBKUR2-01	Non-inoculated	0	2016-04-28	11:15:00	2016-05-22	09-13-22/5	N	0	0	0	0	0	0	0	0	0	0	0	0	0	0	0		0	0
135	14	PI17	0	T/L09	NBKUR2	NBKUR2-01	Non-inoculated	0	2016-04-28	11:15:00	2016-05-22	09-14-22/5	N	0	0	0	0	0	0	0	0	0	0	0	0	0	0	0		0	0
136	15	PI19	0	T/L09	NBKUR2	NBKUR2-01	Non-inoculated	0	2016-04-28	11:15:00	2016-05-22	09-15-22/5	N	0	0	0	0	0	0	0	0	0	0	0	0	0	0	0		0	0
137	1	PI01	0	T/L10	NBKUR2	NBKUR2-02	Non-inoculated	0	2016-04-28	11:15:00	2016-05-08	10-1-8/5	N	0	0	0	0	0	0	0	0	0	0	0	0	0	0	0		0	0
138	2	PI02	0	T/L10	NBKUR2	NBKUR2-02	Non-inoculated	0	2016-04-28	11:15:00	2016-05-14	10-2-14/5	N	0	0	0	0	0	0	0	0	0	0	0	0	0	0	0		0	0
139	3	PI03	0	T/L10	NBKUR2	NBKUR2-02	Non-inoculated	0	2016-04-28	11:15:00	2016-05-20	10-3-20/5	N	0	0	0	0	0	0	0	0	0	0	0	0	0	0	0		0	0
140	4	PI03	0	T/L10	NBKUR2	NBKUR2-02	Non-inoculated	0	2016-04-28	11:15:00	2016-05-22	10-4-22/5	N	0	0	0	0	0	0	0	0	0	0	0	0	0	0	0		0	0
141	5	PI03	0	T/L10	NBKUR2	NBKUR2-02	Non-inoculated	0	2016-04-28	11:15:00	2016-05-22	10-5-22/5	N	0	0	0	0	0	0	0	0	0	0	0	0	0	0	0		0	0
142	6	PI04	0	T/L10	NBKUR2	NBKUR2-02	Non-inoculated	0	2016-04-28	11:15:00	2016-05-22	10-6-22/5	N	0	0	0	0	0	0	0	0	0	0	0	0	0	0	0		0	0
143	7	PI04	0	T/L10	NBKUR2	NBKUR2-02	Non-inoculated	0	2016-04-28	11:15:00	2016-05-22	10-7-22/5	N	0	0	0	0	0	0	0	0	0	0	0	0	0	0	0		0	0
144	8	PI04	0	T/L10	NBKUR2	NBKUR2-02	Non-inoculated	0	2016-04-28	11:15:00	2016-05-22	10-8-22/5	N	0	0	0	0	0	0	0	0	0	0	0	0	0	0	0		0	0
145	9	PI05	0	T/L10	NBKUR2	NBKUR2-02	Non-inoculated	0	2016-04-28	11:15:00	2016-05-22	10-9-22/5	N	0	0	0	0	0	0	0	0	0	0	0	0	0	0	0		0	0
146	10	PI06	0	T/L10	NBKUR2	NBKUR2-02	Non-inoculated	0	2016-04-28	11:15:00	2016-05-22	10-10-22/5	N	0	0	0	0	0	0	0	0	0	0	0	0	0	0	0		0	0
147	11	PI06	0	T/L10	NBKUR2	NBKUR2-02	Non-inoculated	0	2016-04-28	11:15:00	2016-05-22	10-11-22/5	N	0	0	0	0	0	0	0	0	0	0	0	0	0	0	0		0	0
148	12	PI08	0	T/L10	NBKUR2	NBKUR2-02	Non-inoculated	0	2016-04-28	11:15:00	2016-05-22	10-12-22/5	N	0	0	0	0	0	0	0	0	0	0	0	0	0	0	0		0	0
149	13	PI10	0	T/L10	NBKUR2	NBKUR2-02	Non-inoculated	0	2016-04-28	11:15:00	2016-05-22	10-13-22/5	N	0	0	0	0	0	0	0	0	0	0	0	0	0	0	0		0	0
150	14	PI13	0	T/L10	NBKUR2	NBKUR2-02	Non-inoculated	0	2016-04-28	11:15:00	2016-05-22	10-14-22/5	N	0	0	0	0	0	0	0	0	0	0	0	0	0	0	0		0	0
151	15	PI14	0	T/L10	NBKUR2	NBKUR2-02	Non-inoculated	0	2016-04-28	11:15:00	2016-05-22	10-15-22/5	N	0	0	0	0	0	0	0	0	0	0	0	0	0	0	0		0	0
152	1	PI01	0	T/L11	NBKUR2	NBKUR2-03	Inoculated	1	2016-04-28	11:15:00	2016-05-14	11-1-14/5	N	0	0	0	0	0	0	0	0	0	0	0	0	0	0	0		0	0
153	2	PI02	0	T/L11	NBKUR2	NBKUR2-03	Inoculated	1	2016-04-28	11:15:00	2016-05-14	11-2-14/5	Y	1	37	5.65685	41	8	9	8	8	8	33	8	7	2	8	8		74	74000
154	3	PI02	0	T/L11	NBKUR2	NBKUR2-03	Inoculated	1	2016-04-28	11:15:00	2016-05-14	11-3-14/5	Y	1	30.5	2.12132	32	8	7	9	6	2	29	3	6	7	4	9		61	61000
155	4	PI02	0	T/L11	NBKUR2	NBKUR2-03	Inoculated	1	2016-04-28	11:15:00	2016-05-20	11-4-20/5	Y	1	16.5	6.36396	21	2	7	5	4	3	12	1	3	2	3	3		33	33000
156	5	PI02	0	T/L11	NBKUR2	NBKUR2-03	Inoculated	1	2016-04-28	11:15:00	2016-05-20	11-5-20/5	Y	1	13	4.24264	16	5	4	2	3	2	10	2	2	2	1	3		26	26000
157	6	PI02	0	T/L11	NBKUR2	NBKUR2-03	Inoculated	1	2016-04-28	11:15:00	2016-05-20	11-6-20/5	Y	1	12	1.41421	13	5	3	1	3	1	11	1	2	2	3	3		24	24000
158	7	PI02	0	T/L11	NBKUR2	NBKUR2-03	Inoculated	1	2016-04-28	11:15:00	2016-05-21	11-7-21/5	Y	1	21.5	6.36396	17	4	3	3	3	4	26	5	6	6	6	3		43	43000
159	8	PI03	0	T/L11	NBKUR2	NBKUR2-03	Inoculated	1	2016-04-28	11:15:00	2016-05-21	11-8-21/5	Y	1	11	1.41421	10	5	2	1	1	1	12	1	3	2	3	3		22	22000
160	9	PI03	0	T/L11	NBKUR2	NBKUR2-03	Inoculated	1	2016-04-28	11:15:00	2016-05-21	11-9-21/5	Y	1	30	5.65685	26	9	5	4	5	3	34	8	5	4	6	11		60	60000
161	10	PI03	0	T/L11	NBKUR2	NBKUR2-03	Inoculated	1	2016-04-28	11:15:00	2016-05-21	11-10-21/5	Y	1	23.5	6.36396	28	11	5	3	7	2	19	5	4	5	3	2		47	47000
162	11	PI03	0	T/L11	NBKUR2	NBKUR2-03	Inoculated	1	2016-04-28	11:15:00	2016-05-21	11-11-21/5	Y	1	15	2.82843	13	3	3	2	3	2	17	3	4	3	5	2		30	30000
163	12	PI03	0	T/L11	NBKUR2	NBKUR2-03	Inoculated	1	2016-04-28	11:15:00	2016-05-21	11-12-21/5	Y	1	19.5	3.53553	17	3	4	3	4	3	22	4	6	4	3	5		39	39000
164	13	PI03	0	T/L11	NBKUR2	NBKUR2-03	Inoculated	1	2016-04-28	11:15:00	2016-05-21	11-13-21/5	Y	1	19	7.07107	24	3	4	11	4	2	14	3	2	3	3	3		38	38000
165	14	PI04	0	T/L11	NBKUR2	NBKUR2-03	Inoculated	1	2016-04-28	11:15:00	2016-05-21	11-14-21/5	Y	1	37	2.82843	39	8	6	11	7	7	35	6	5	7	11	6		74	74000
166	15	PI04	0	T/L11	NBKUR2	NBKUR2-03	Inoculated	1	2016-04-28	11:15:00	2016-05-21	11-15-21/5	Y	1	17.5	2.12132	16	2	3	4	3	4	19	3	4	4	4	4		35	35000
167	16	PI04	0	T/L11	NBKUR2	NBKUR2-03	Inoculated	1	2016-04-28	11:15:00	2016-05-21	11-16-21/5	Y	1	36	9.89949	29	5	3	9	6	6	43	6	11	9	8	9		72	72000
168	1	PI01	0	T/L12	NBKUR2	NBKUR2-04	Inoculated	1	2016-04-28	11:15:00	2016-05-21	12-1-21/5	N	0	0	0	0	0	0	0	0	0	0	0	0	0	0	0		0	0
169	2	PI01	0	T/L12	NBKUR2	NBKUR2-04	Inoculated	1	2016-04-28	11:15:00	2016-05-21	12-2-21/5	N	0	0	0	0	0	0	0	0	0	0	0	0	0	0	0		0	0
170	3	PI02	0	T/L12	NBKUR2	NBKUR2-04	Inoculated	1	2016-04-28	11:15:00	2016-05-20	12-3-20/5	Y	1	14.5	0.707107	15	5	4	0	3	3	14	3	3	2	3	3		29	29000
171	4	PI03	0	T/L12	NBKUR2	NBKUR2-04	Inoculated	1	2016-04-28	11:15:00	2016-05-20	12-4-20/5	Y	1	18.5	2.12132	20	5	4	4	4	3	17	1	2	3	6	5		37	37000
172	5	PI03	0	T/L12	NBKUR2	NBKUR2-04	Inoculated	1	2016-04-28	11:15:00	2016-05-20	12-5-20/5	Y	1	19	2.82843	17	4	3	4	3	3	21	3	5	4	3	6		38	38000
173	6	PI03	0	T/L12	NBKUR2	NBKUR2-04	Inoculated	1	2016-04-28	11:15:00	2016-05-20	12-6-20/5	Y	1	18.5	0.707107	18	4	3	4	3	4	19	4	4	4	4	3		37	37000
174	7	PI03	0	T/L12	NBKUR2	NBKUR2-04	Inoculated	1	2016-04-28	11:15:00	2016-05-21	12-7-21/5	Y	1	32	7.07107	37	11	7	9	7	3	27	8	5	5	5	4		64	64000
175	8	PI04	0	T/L12	NBKUR2	NBKUR2-04	Inoculated	1	2016-04-28	11:15:00	2016-05-21	12-8-21/5	N	0	0	0	0	0	0	0	0	0	0	0	0	0	0	0		0	0
176	9	PI04	0	T/L12	NBKUR2	NBKUR2-04	Inoculated	1	2016-04-28	11:15:00	2016-05-21	12-9-21/5	N	0	0	0	0	0	0	0	0	0	0	0	0	0	0	0		0	0
177	10	PI05	0	T/L12	NBKUR2	NBKUR2-04	Inoculated	1	2016-04-28	11:15:00	2016-05-22	12-10-22/5	Y	1	15	1.41421	14	4	3	2	3	2	16	2	2	2	5	5		30	30000
178	11	PI05	0	T/L12	NBKUR2	NBKUR2-04	Inoculated	1	2016-04-28	11:15:00	2016-05-21	12-11-21/5	N	0	0	0	0	0	0	0	0	0	0	0	0	0	0	0		0	0
179	12	PI06	0	T/L12	NBKUR2	NBKUR2-04	Inoculated	1	2016-04-28	11:15:00	2016-05-21	12-12-21/5	N	0	0	0	0	0	0	0	0	0	0	0	0	0	0	0		0	0
180	13	PI06	0	T/L12	NBKUR2	NBKUR2-04	Inoculated	1	2016-04-28	11:15:00	2016-05-21	12-13-21/5	N	0	0	0	0	0	0	0	0	0	0	0	0	0	0	0		0	0
181	14	PI08	0	T/L12	NBKUR2	NBKUR2-04	Inoculated	1	2016-04-28	11:15:00	2016-05-21	12-14-21/5	N	0	0	0	0	0	0	0	0	0	0	0	0	0	0	0		0	0
182	15	PI08	0	T/L12	NBKUR2	NBKUR2-04	Inoculated	1	2016-04-28	11:15:00	2016-05-21	12-15-21/5	N	0	0	0	0	0	0	0	0	0	0	0	0	0	0	0		0	0
183	1	PI01	0	T/L13	NBKUR2	NBKUR2-05	Non-inoculated	0	2016-04-28	11:15:00	2016-05-05	13-1-5/5	N	0	0	0	0	0	0	0	0	0	0	0	0	0	0	0		0	0
184	2	PI01	0	T/L13	NBKUR2	NBKUR2-05	Non-inoculated	0	2016-04-28	11:15:00	2016-05-05	13-2-5/5	N	0	0	0	0	0	0	0	0	0	0	0	0	0	0	0		0	0
185	3	PI03	0	T/L13	NBKUR2	NBKUR2-05	Non-inoculated	0	2016-04-28	11:15:00	2016-05-05	13-3-5/5	N	0	0	0	0	0	0	0	0	0	0	0	0	0	0	0		0	0
186	4	PI04	0	T/L13	NBKUR2	NBKUR2-05	Non-inoculated	0	2016-04-28	11:15:00	2016-05-22	13-4-22/5	N	0	0	0	0	0	0	0	0	0	0	0	0	0	0	0		0	0
187	5	PI04	0	T/L13	NBKUR2	NBKUR2-05	Non-inoculated	0	2016-04-28	11:15:00	2016-05-22	13-5-22/5	N	0	0	0	0	0	0	0	0	0	0	0	0	0	0	0		0	0
188	6	PI04	0	T/L13	NBKUR2	NBKUR2-05	Non-inoculated	0	2016-04-28	11:15:00	2016-05-22	13-6-22/5	N	0	0	0	0	0	0	0	0	0	0	0	0	0	0	0		0	0
189	7	PI05	0	T/L13	NBKUR2	NBKUR2-05	Non-inoculated	0	2016-04-28	11:15:00	2016-05-22	13-7-22/5	N	0	0	0	0	0	0	0	0	0	0	0	0	0	0	0		0	0
190	8	PI05	0	T/L13	NBKUR2	NBKUR2-05	Non-inoculated	0	2016-04-28	11:15:00	2016-05-22	13-8-22/5	N	0	0	0	0	0	0	0	0	0	0	0	0	0	0	0		0	0
191	9	PI07	0	T/L13	NBKUR2	NBKUR2-05	Non-inoculated	0	2016-04-28	11:15:00	2016-05-22	13-9-22/5	N	0	0	0	0	0	0	0	0	0	0	0	0	0	0	0		0	0
192	10	PI11	0	T/L13	NBKUR2	NBKUR2-05	Non-inoculated	0	2016-04-28	11:15:00	2016-05-22	13-10-22/5	N	0	0	0	0	0	0	0	0	0	0	0	0	0	0	0		0	0
193	11	PI13	0	T/L13	NBKUR2	NBKUR2-05	Non-inoculated	0	2016-04-28	11:15:00	2016-05-22	13-11-22/5	N	0	0	0	0	0	0	0	0	0	0	0	0	0	0	0		0	0
194	12	PI13	0	T/L13	NBKUR2	NBKUR2-05	Non-inoculated	0	2016-04-28	11:15:00	2016-05-22	13-12-22/5	N	0	0	0	0	0	0	0	0	0	0	0	0	0	0	0		0	0
195	13	PI15	0	T/L13	NBKUR2	NBKUR2-05	Non-inoculated	0	2016-04-28	11:15:00	2016-05-22	13-13-22/5	N	0	0	0	0	0	0	0	0	0	0	0	0	0	0	0		0	0
196	14	PI16	0	T/L13	NBKUR2	NBKUR2-05	Non-inoculated	0	2016-04-28	11:15:00	2016-05-22	13-14-22/5	N	0	0	0	0	0	0	0	0	0	0	0	0	0	0	0		0	0
197	15	PI0	1	T/L13	NBKUR2	NBKUR2-05	Non-inoculated	0	2016-04-28	11:15:00					0	0	0	0	0	0	0	0	0	0	0	0	0	0		0	0
198	1	PI01	0	T/L14	NBKUR2	NBKUR2-06	Inoculated	1	2016-04-28	11:15:00	2016-05-21	14-1-21/5	N	0	0	0	0	0	0	0	0	0	0	0	0	0	0	0		0	0
199	2	PI02	0	T/L14	NBKUR2	NBKUR2-06	Inoculated	1	2016-04-28	11:15:00	2016-05-20	14-2-20/5	Y	1	33	11.3137	25	3	4	7	6	5	41	6	7	9	13	6		66	66000
200	3	PI02	0	T/L14	NBKUR2	NBKUR2-06	Inoculated	1	2016-04-28	11:15:00	2016-05-20	14-3-20/5	Y	1	31.5	6.36396	27	12	4	4	4	3	36	8	7	9	4	8		63	63000
201	4	PI02	0	T/L14	NBKUR2	NBKUR2-06	Inoculated	1	2016-04-28	11:15:00	2016-05-20	14-4-20/5	Y	1	37	4.24264	40	9	16	3	6	6	34	6	7	8	7	6		74	74000
202	5	PI03	0	T/L14	NBKUR2	NBKUR2-06	Inoculated	1	2016-04-28	11:15:00	2016-05-20	14-5-20/5	Y	1	40.5	2.12132	42	17	4	3	9	9	39	9	9	7	8	6		81	81000
203	6	PI03	0	T/L14	NBKUR2	NBKUR2-06	Inoculated	1	2016-04-28	11:15:00	2016-05-20	14-6-20/5	Y	1	37	11.3137	29	4	6	8	5	6	45	8	7	9	10	11		74	74000
204	7	PI03	0	T/L14	NBKUR2	NBKUR2-06	Inoculated	1	2016-04-28	11:15:00	2016-05-21	14-7-21/5	Y	1	42	4.24264	39	11	4	9	9	6	45	15	6	6	9	9		84	84000
205	8	PI04	0	T/L14	NBKUR2	NBKUR2-06	Inoculated	1	2016-04-28	11:15:00	2016-05-21	14-8-21/5	Y	1	27.5	3.53553	25	1	4	8	5	7	30	7	6	8	5	4		55	55000
206	9	PI04	0	T/L14	NBKUR2	NBKUR2-06	Inoculated	1	2016-04-28	11:15:00	2016-05-21	14-9-21/5	N	0	0	0	0	0	0	0	0	0	0	0	0	0	0	0		0	0
207	10	PI05	0	T/L14	NBKUR2	NBKUR2-06	Inoculated	1	2016-04-28	11:15:00	2016-05-21	14-10-21/5	N	0	0	0	0	0	0	0	0	0	0	0	0	0	0	0		0	0
208	11	PI05	0	T/L14	NBKUR2	NBKUR2-06	Inoculated	1	2016-04-28	11:15:00	2016-05-22	14-11-22/5	Y	1	31	1.41421	30	5	4	8	7	6	32	5	6	5	8	8		62	62000
209	12	PI06	0	T/L14	NBKUR2	NBKUR2-06	Inoculated	1	2016-04-28	11:15:00	2016-05-21	14-12-21/5	N	0	0	0	0	0	0	0	0	0	0	0	0	0	0	0		0	0
210	13	PI06	0	T/L14	NBKUR2	NBKUR2-06	Inoculated	1	2016-04-28	11:15:00	2016-05-21	14-13-21/5	N	0	0	0	0	0	0	0	0	0	0	0	0	0	0	0		0	0
211	14	PI07	0	T/L14	NBKUR2	NBKUR2-06	Inoculated	1	2016-04-28	11:15:00	2016-05-22	14-14-22/5	Y	1	21.5	4.94975	18	7	3	4	2	2	25	7	7	4	3	4		43	43000
212	15	PI07	0	T/L14	NBKUR2	NBKUR2-06	Inoculated	1	2016-04-28	11:15:00	2016-05-21	14-15-21/5	N	0	0	0	0	0	0	0	0	0	0	0	0	0	0	0		0	0
213	1	PI01	0	T/L15	NBKUR2	NBKUR2-07	Non-inoculated	0	2016-04-28	11:15:00	2016-05-08	15-1-8/5	N	0	0	0	0	0	0	0	0	0	0	0	0	0	0	0		0	0
214	2	PI02	0	T/L15	NBKUR2	NBKUR2-07	Non-inoculated	0	2016-04-28	11:15:00	2016-05-08	15-2-8/5	N	0	0	0	0	0	0	0	0	0	0	0	0	0	0	0		0	0
215	3	PI02	0	T/L15	NBKUR2	NBKUR2-07	Non-inoculated	0	2016-04-28	11:15:00	2016-05-08	15-3-8/5	N	0	0	0	0	0	0	0	0	0	0	0	0	0	0	0		0	0
216	4	PI03	0	T/L15	NBKUR2	NBKUR2-07	Non-inoculated	0	2016-04-28	11:15:00	2016-05-08	15-4-8/5	N	0	0	0	0	0	0	0	0	0	0	0	0	0	0	0		0	0
217	5	PI06	0	T/L15	NBKUR2	NBKUR2-07	Non-inoculated	0	2016-04-28	11:15:00	2016-05-08	15-5-8/5	N	0	0	0	0	0	0	0	0	0	0	0	0	0	0	0		0	0
218	6	PI08	0	T/L15	NBKUR2	NBKUR2-07	Non-inoculated	0	2016-04-28	11:15:00	2016-05-22	15-6-22/5	N	0	0	0	0	0	0	0	0	0	0	0	0	0	0	0		0	0
219	7	PI10	0	T/L15	NBKUR2	NBKUR2-07	Non-inoculated	0	2016-04-28	11:15:00	2016-05-22	15-7-22/5	N	0	0	0	0	0	0	0	0	0	0	0	0	0	0	0		0	0
220	8	PI12	0	T/L15	NBKUR2	NBKUR2-07	Non-inoculated	0	2016-04-28	11:15:00	2016-05-22	15-8-22/5	N	0	0	0	0	0	0	0	0	0	0	0	0	0	0	0		0	0
221	9	PI13	0	T/L15	NBKUR2	NBKUR2-07	Non-inoculated	0	2016-04-28	11:15:00	2016-05-22	15-9-22/5	N	0	0	0	0	0	0	0	0	0	0	0	0	0	0	0		0	0
222	10	PI14	0	T/L15	NBKUR2	NBKUR2-07	Non-inoculated	0	2016-04-28	11:15:00	2016-05-22	15-10-22/5	N	0	0	0	0	0	0	0	0	0	0	0	0	0	0	0		0	0
223	11	PI15	0	T/L15	NBKUR2	NBKUR2-07	Non-inoculated	0	2016-04-28	11:15:00	2016-05-22	15-11-22/5	N	0	0	0	0	0	0	0	0	0	0	0	0	0	0	0		0	0
224	12	PI16	0	T/L15	NBKUR2	NBKUR2-07	Non-inoculated	0	2016-04-28	11:15:00	2016-05-22	15-12-22/5	N	0	0	0	0	0	0	0	0	0	0	0	0	0	0	0		0	0
225	13	PI16	0	T/L15	NBKUR2	NBKUR2-07	Non-inoculated	0	2016-04-28	11:15:00	2016-05-22	15-13-22/5	N	0	0	0	0	0	0	0	0	0	0	0	0	0	0	0		0	0
226	14	PI17	0	T/L15	NBKUR2	NBKUR2-07	Non-inoculated	0	2016-04-28	11:15:00	2016-05-22	15-14-22/5	N	0	0	0	0	0	0	0	0	0	0	0	0	0	0	0		0	0
227	15	PI0	1	T/L15	NBKUR2	NBKUR2-07	Non-inoculated	0	2016-04-28	11:15:00					0	0	0	0	0	0	0	0	0	0	0	0	0	0		0	0
228	1	PI01	0	T/L16	NBKUR2	NBKUR2-08	Inoculated	1	2016-04-28	11:15:00	2016-05-21	16-1-21/5	N	0	0	0	0	0	0	0	0	0	0	0	0	0	0	0		0	0
229	2	PI01	0	T/L16	NBKUR2	NBKUR2-08	Inoculated	1	2016-04-28	11:15:00	2016-05-21	16-2-21/5	N	0	0	0	0	0	0	0	0	0	0	0	0	0	0	0		0	0
230	3	PI02	0	T/L16	NBKUR2	NBKUR2-08	Inoculated	1	2016-04-28	11:15:00	2016-05-20	16-3-20/5	Y	1	29	1.41421	30	6	6	5	7	6	28	7	6	6	6	3		58	58000
231	4	PI02	0	T/L16	NBKUR2	NBKUR2-08	Inoculated	1	2016-04-28	11:15:00	2016-05-20	16-4-20/5	Y	1	31	8.48528	37	8	8	9	6	6	25	6	5	5	5	4		62	62000
232	5	PI02	0	T/L16	NBKUR2	NBKUR2-08	Inoculated	1	2016-04-28	11:15:00	2016-05-20	16-5-20/5	Y	1	56	9.89949	63	7	18	17	11	10	49	9	7	7	11	15		112	112000
233	6	PI02	0	T/L16	NBKUR2	NBKUR2-08	Inoculated	1	2016-04-28	11:15:00	2016-05-20	16-6-20/5	Y	1	45	7.07107	50	9	8	8	11	14	40	6	5	9	13	7		90	90000
234	7	PI02	0	T/L16	NBKUR2	NBKUR2-08	Inoculated	1	2016-04-28	11:15:00	2016-05-20	16-7-20/5	Y	1	40	1.41421	39	9	8	8	8	6	41	6	8	8	8	11		80	80000
235	8	PI03	0	T/L16	NBKUR2	NBKUR2-08	Inoculated	1	2016-04-28	11:15:00	2016-05-20	16-8-20/5	Y	1	57	4.24264	60	17	9	9	11	14	54	11	8	9	11	15		114	114000
236	9	PI03	0	T/L16	NBKUR2	NBKUR2-08	Inoculated	1	2016-04-28	11:15:00	2016-05-21	16-9-21/5	Y	1	40.5	6.36396	36	7	8	7	7	7	45	7	6	7	11	14		81	81000
237	10	PI03	0	T/L16	NBKUR2	NBKUR2-08	Inoculated	1	2016-04-28	11:15:00	2016-05-21	16-10-21/5	Y	1	44	5.65685	48	10	17	9	6	6	40	6	7	8	11	8		88	88000
238	11	PI03	0	T/L16	NBKUR2	NBKUR2-08	Inoculated	1	2016-04-28	11:15:00	2016-05-21	16-11-21/5	Y	1	45.5	2.12132	47	8	9	11	8	11	44	17	4	5	7	11		91	91000
239	12	PI04	0	T/L16	NBKUR2	NBKUR2-08	Inoculated	1	2016-04-28	11:15:00	2016-05-21	16-12-21/5	Y	1	35.5	2.12132	37	7	7	8	7	8	34	7	7	7	8	5		71	71000
240	13	PI04	0	T/L16	NBKUR2	NBKUR2-08	Inoculated	1	2016-04-28	11:15:00	2016-05-21	16-13-21/5	Y	1	22.5	2.12132	24	4	5	5	5	5	21	5	5	3	4	4		45	45000
241	14	PI05	0	T/L16	NBKUR2	NBKUR2-08	Inoculated	1	2016-04-28	11:15:00	2016-05-21	16-14-21/5	N	0	0	0	0	0	0	0	0	0	0	0	0	0	0	0		0	0
242	15	PI06	0	T/L16	NBKUR2	NBKUR2-08	Inoculated	1	2016-04-28	11:15:00	2016-05-21	16-15-21/5	N	0	0	0	0	0	0	0	0	0	0	0	0	0	0	0		0	0
243	1	PI01	0	T/L17	NBJCU4	NBJCU4-01	Non-inoculated	0	2016-04-29	13:30:00	2016-05-18	17-1-18/5	N	0	0	0	0	0	0	0	0	0	0	0	0	0	0	0		0	0
244	2	PI02	0	T/L17	NBJCU4	NBJCU4-01	Non-inoculated	0	2016-04-29	13:30:00	2016-05-18	17-2-18/5	N	0	0	0	0	0	0	0	0	0	0	0	0	0	0	0		0	0
245	3	PI02	0	T/L17	NBJCU4	NBJCU4-01	Non-inoculated	0	2016-04-29	13:30:00	2016-05-18	17-3-18/5	N	0	0	0	0	0	0	0	0	0	0	0	0	0	0	0		0	0
246	4	PI02	0	T/L17	NBJCU4	NBJCU4-01	Non-inoculated	0	2016-04-29	13:30:00	2016-05-18	17-4-18/5	N	0	0	0	0	0	0	0	0	0	0	0	0	0	0	0		0	0
247	5	PI03	0	T/L17	NBJCU4	NBJCU4-01	Non-inoculated	0	2016-04-29	13:30:00	2016-05-22	17-5-22/5	N	0	0	0	0	0	0	0	0	0	0	0	0	0	0	0		0	0
248	6	PI05	0	T/L17	NBJCU4	NBJCU4-01	Non-inoculated	0	2016-04-29	13:30:00	2016-05-22	17-6-22/5	N	0	0	0	0	0	0	0	0	0	0	0	0	0	0	0		0	0
249	7	PI06	0	T/L17	NBJCU4	NBJCU4-01	Non-inoculated	0	2016-04-29	13:30:00	2016-05-22	17-7-22/5	N	0	0	0	0	0	0	0	0	0	0	0	0	0	0	0		0	0
250	8	PI11	0	T/L17	NBJCU4	NBJCU4-01	Non-inoculated	0	2016-04-29	13:30:00	2016-05-22	17-8-22/5	N	0	0	0	0	0	0	0	0	0	0	0	0	0	0	0		0	0
251	9	PI13	0	T/L17	NBJCU4	NBJCU4-01	Non-inoculated	0	2016-04-29	13:30:00	2016-05-22	17-9-22/5	N	0	0	0	0	0	0	0	0	0	0	0	0	0	0	0		0	0
252	10	PI14	0	T/L17	NBJCU4	NBJCU4-01	Non-inoculated	0	2016-04-29	13:30:00	2016-05-22	17-10-22/5	N	0	0	0	0	0	0	0	0	0	0	0	0	0	0	0		0	0
253	11	PI14	0	T/L17	NBJCU4	NBJCU4-01	Non-inoculated	0	2016-04-29	13:30:00	2016-05-22	17-11-22/5	N	0	0	0	0	0	0	0	0	0	0	0	0	0	0	0		0	0
254	12	PI14	0	T/L17	NBJCU4	NBJCU4-01	Non-inoculated	0	2016-04-29	13:30:00	2016-05-22	17-12-22/5	N	0	0	0	0	0	0	0	0	0	0	0	0	0	0	0		0	0
255	13	PI15	0	T/L17	NBJCU4	NBJCU4-01	Non-inoculated	0	2016-04-29	13:30:00	2016-05-22	17-13-22/5	N	0	0	0	0	0	0	0	0	0	0	0	0	0	0	0		0	0
256	14	PI16	0	T/L17	NBJCU4	NBJCU4-01	Non-inoculated	0	2016-04-29	13:30:00	2016-05-22	17-14-22/5	N	0	0	0	0	0	0	0	0	0	0	0	0	0	0	0		0	0
257	15	PI16	0	T/L17	NBJCU4	NBJCU4-01	Non-inoculated	0	2016-04-29	13:30:00	2016-05-22	17-15-22/5	N	0	0	0	0	0	0	0	0	0	0	0	0	0	0	0		0	0
258	1	PI01	0	T/L18	NBJCU4	NBJCU4-02	Non-inoculated	0	2016-04-29	10:30:00	2016-05-14	18-1-14/5	N	0	0	0	0	0	0	0	0	0	0	0	0	0	0	0		0	0
259	2	PI01	0	T/L18	NBJCU4	NBJCU4-02	Non-inoculated	0	2016-04-29	10:30:00	2016-05-14	18-2-14/5	N	0	0	0	0	0	0	0	0	0	0	0	0	0	0	0		0	0
260	3	PI01	0	T/L18	NBJCU4	NBJCU4-02	Non-inoculated	0	2016-04-29	10:30:00	2016-05-14	18-3-14/5	N	0	0	0	0	0	0	0	0	0	0	0	0	0	0	0		0	0
261	4	PI02	0	T/L18	NBJCU4	NBJCU4-02	Non-inoculated	0	2016-04-29	10:30:00	2016-05-14	18-4-14/5	N	0	0	0	0	0	0	0	0	0	0	0	0	0	0	0		0	0
262	5	PI02	0	T/L18	NBJCU4	NBJCU4-02	Non-inoculated	0	2016-04-29	10:30:00	2016-05-14	18-5-14/5	N	0	0	0	0	0	0	0	0	0	0	0	0	0	0	0		0	0
263	6	PI06	0	T/L18	NBJCU4	NBJCU4-02	Non-inoculated	0	2016-04-29	10:30:00	2016-05-14	18-6-14/5	N	0	0	0	0	0	0	0	0	0	0	0	0	0	0	0		0	0
264	7	PI06	0	T/L18	NBJCU4	NBJCU4-02	Non-inoculated	0	2016-04-29	10:30:00	2016-05-22	18-7-22/5	N	0	0	0	0	0	0	0	0	0	0	0	0	0	0	0		0	0
265	8	PI08	0	T/L18	NBJCU4	NBJCU4-02	Non-inoculated	0	2016-04-29	10:30:00	2016-05-22	18-8-22/5	N	0	0	0	0	0	0	0	0	0	0	0	0	0	0	0		0	0
266	9	PI08	0	T/L18	NBJCU4	NBJCU4-02	Non-inoculated	0	2016-04-29	10:30:00	2016-05-22	18-9-22/5	N	0	0	0	0	0	0	0	0	0	0	0	0	0	0	0		0	0
267	10	PI08	0	T/L18	NBJCU4	NBJCU4-02	Non-inoculated	0	2016-04-29	10:30:00	2016-05-22	18-10-22/5	N	0	0	0	0	0	0	0	0	0	0	0	0	0	0	0		0	0
268	11	PI08	0	T/L18	NBJCU4	NBJCU4-02	Non-inoculated	0	2016-04-29	10:30:00	2016-05-22	18-11-22/5	N	0	0	0	0	0	0	0	0	0	0	0	0	0	0	0		0	0
269	12	PI11	0	T/L18	NBJCU4	NBJCU4-02	Non-inoculated	0	2016-04-29	10:30:00	2016-05-22	18-12-22/5	N	0	0	0	0	0	0	0	0	0	0	0	0	0	0	0		0	0
270	13	PI12	0	T/L18	NBJCU4	NBJCU4-02	Non-inoculated	0	2016-04-29	10:30:00	2016-05-22	18-13-22/5	N	0	0	0	0	0	0	0	0	0	0	0	0	0	0	0		0	0
271	14	PI13	0	T/L18	NBJCU4	NBJCU4-02	Non-inoculated	0	2016-04-29	10:30:00	2016-05-22	18-14-22/5	N	0	0	0	0	0	0	0	0	0	0	0	0	0	0	0		0	0
272	15	PI14	0	T/L18	NBJCU4	NBJCU4-02	Non-inoculated	0	2016-04-29	10:30:00	2016-05-22	18-15-22/5	N	0	0	0	0	0	0	0	0	0	0	0	0	0	0	0		0	0
273	1	PI01	0	T/L19	NBJCU4	NBJCU4-03	Inoculated	1	2016-04-29	10:30:00	2016-05-14	19-1-15/5	N	0	0	0	0	0	0	0	0	0	0	0	0	0	0	0		0	0
274	2	PI02	0	T/L19	NBJCU4	NBJCU4-03	Inoculated	1	2016-04-29	10:30:00	2016-05-14	19-2-15/5	Y	1	38	4.24264	35	10	7	6	6	6	41	13	9	7	6	6		76	76000
275	3	PI02	0	T/L19	NBJCU4	NBJCU4-03	Inoculated	1	2016-04-29	10:30:00	2016-05-14	19-3-15/5	Y	1	29	7.07107	34	7	7	6	8	6	24	5	4	5	6	4		58	58000
276	4	PI02	0	T/L19	NBJCU4	NBJCU4-03	Inoculated	1	2016-04-29	10:30:00	2016-05-14	19-4-15/5	Y	1	17.5	0.707107	18	3	4	4	4	3	17	3	3	3	3	5		35	35000
277	5	PI03	0	T/L19	NBJCU4	NBJCU4-03	Inoculated	1	2016-04-29	10:30:00	2016-05-21	19-5-21/5	N	0	0	0	0	0	0	0	0	0	0	0	0	0	0	0		0	0
278	6	PI03	0	T/L19	NBJCU4	NBJCU4-03	Inoculated	1	2016-04-29	10:30:00	2016-05-21	19-6-21/5	N	0	0	0	0	0	0	0	0	0	0	0	0	0	0	0		0	0
279	7	PI03	0	T/L19	NBJCU4	NBJCU4-03	Inoculated	1	2016-04-29	10:30:00	2016-05-21	19-7-21/5	N	0	0	0	0	0	0	0	0	0	0	0	0	0	0	0		0	0
280	8	PI03	0	T/L19	NBJCU4	NBJCU4-03	Inoculated	1	2016-04-29	10:30:00	2016-05-20	19-8-20/5	Y	1	29.5	0.707107	29	8	6	1	7	7	30	6	5	7	6	6		59	59000
281	9	PI04	0	T/L19	NBJCU4	NBJCU4-03	Inoculated	1	2016-04-29	10:30:00	2016-05-20	19-9-20/5	Y	1	17.5	2.12132	16	2	3	4	3	4	19	3	4	4	4	4		35	35000
282	10	PI04	0	T/L19	NBJCU4	NBJCU4-03	Inoculated	1	2016-04-29	10:30:00	2016-05-20	19-10-20/5	Y	1	7.5	7.77817	13	4	3	3	2	1	2	1	1	0	0	0		15	15000
283	11	PI06	0	T/L19	NBJCU4	NBJCU4-03	Inoculated	1	2016-04-29	10:30:00	2016-05-21	19-11-21/5	N	0	0	0	0	0	0	0	0	0	0	0	0	0	0	0		0	0
284	12	PI06	0	T/L19	NBJCU4	NBJCU4-03	Inoculated	1	2016-04-29	10:30:00	2016-05-21	19-12-21/5	N	0	0	0	0	0	0	0	0	0	0	0	0	0	0	0		0	0
285	13	PI06	0	T/L19	NBJCU4	NBJCU4-03	Inoculated	1	2016-04-29	10:30:00	2016-05-21	19-13-21/5	N	0	0	0	0	0	0	0	0	0	0	0	0	0	0	0		0	0
286	14	PI06	0	T/L19	NBJCU4	NBJCU4-03	Inoculated	1	2016-04-29	10:30:00	2016-05-22	19-14-22/5	Y	1	14.5	0.707107	15	5	4	0	3	3	14	3	3	2	3	3		29	29000
287	15	PI06	0	T/L19	NBJCU4	NBJCU4-03	Inoculated	1	2016-04-29	10:30:00	2016-05-21	19-15-21/5	N	0	0	0	0	0	0	0	0	0	0	0	0	0	0	0		0	0
288	1	PI01	0	T/L20	NBJCU4	NBJCU4-04	Non-inoculated	0	2016-04-29	13:30:00	2016-05-17	20-1-17/5	N	0	0	0	0	0	0	0	0	0	0	0	0	0	0	0		0	0
289	2	PI02	0	T/L20	NBJCU4	NBJCU4-04	Non-inoculated	0	2016-04-29	13:30:00	2016-05-17	20-2-17/5	N	0	0	0	0	0	0	0	0	0	0	0	0	0	0	0		0	0
290	3	PI02	0	T/L20	NBJCU4	NBJCU4-04	Non-inoculated	0	2016-04-29	13:30:00	2016-05-17	20-3-17/5	N	0	0	0	0	0	0	0	0	0	0	0	0	0	0	0		0	0
291	4	PI03	0	T/L20	NBJCU4	NBJCU4-04	Non-inoculated	0	2016-04-29	13:30:00	2016-05-22	20-4-22/5	N	0	0	0	0	0	0	0	0	0	0	0	0	0	0	0		0	0
292	5	PI06	0	T/L20	NBJCU4	NBJCU4-04	Non-inoculated	0	2016-04-29	13:30:00	2016-05-22	20-5-22/5	N	0	0	0	0	0	0	0	0	0	0	0	0	0	0	0		0	0
293	6	PI09	0	T/L20	NBJCU4	NBJCU4-04	Non-inoculated	0	2016-04-29	13:30:00	2016-05-22	20-6-22/5	N	0	0	0	0	0	0	0	0	0	0	0	0	0	0	0		0	0
294	7	PI11	0	T/L20	NBJCU4	NBJCU4-04	Non-inoculated	0	2016-04-29	13:30:00	2016-05-22	20-7-22/5	N	0	0	0	0	0	0	0	0	0	0	0	0	0	0	0		0	0
295	8	PI12	0	T/L20	NBJCU4	NBJCU4-04	Non-inoculated	0	2016-04-29	13:30:00	2016-05-22	20-8-22/5	N	0	0	0	0	0	0	0	0	0	0	0	0	0	0	0		0	0
296	9	PI13	0	T/L20	NBJCU4	NBJCU4-04	Non-inoculated	0	2016-04-29	13:30:00	2016-05-22	20-9-22/5	N	0	0	0	0	0	0	0	0	0	0	0	0	0	0	0		0	0
297	10	PI13	0	T/L20	NBJCU4	NBJCU4-04	Non-inoculated	0	2016-04-29	13:30:00	2016-05-22	20-10-22/5	N	0	0	0	0	0	0	0	0	0	0	0	0	0	0	0		0	0
298	11	PI14	0	T/L20	NBJCU4	NBJCU4-04	Non-inoculated	0	2016-04-29	13:30:00	2016-05-22	20-11-22/5	N	0	0	0	0	0	0	0	0	0	0	0	0	0	0	0		0	0
299	12	PI15	0	T/L20	NBJCU4	NBJCU4-04	Non-inoculated	0	2016-04-29	13:30:00	2016-05-22	20-12-22/5	N	0	0	0	0	0	0	0	0	0	0	0	0	0	0	0		0	0
300	13	PI15	0	T/L20	NBJCU4	NBJCU4-04	Non-inoculated	0	2016-04-29	13:30:00	2016-05-22	20-13-22/5	N	0	0	0	0	0	0	0	0	0	0	0	0	0	0	0		0	0
301	14	PI16	0	T/L20	NBJCU4	NBJCU4-04	Non-inoculated	0	2016-04-29	13:30:00	2016-05-22	20-14-22/5	N	0	0	0	0	0	0	0	0	0	0	0	0	0	0	0		0	0
302	15	PI0	1	T/L20	NBJCU4	NBJCU4-04	Non-inoculated	0	2016-04-29	13:30:00					0	0	0	0	0	0	0	0	0	0	0	0	0	0		0	0
303	1	PI01	0	T/L21	NBJCU4	NBJCU4-05	Non-inoculated	0	2016-04-29	13:30:00	2016-05-17	21-1-17/5	N	0	0	0	0	0	0	0	0	0	0	0	0	0	0	0		0	0
304	2	PI01	0	T/L21	NBJCU4	NBJCU4-05	Non-inoculated	0	2016-04-29	13:30:00	2016-05-20	21-2-20/5	N	0	0	0	0	0	0	0	0	0	0	0	0	0	0	0		0	0
305	3	PI02	0	T/L21	NBJCU4	NBJCU4-05	Non-inoculated	0	2016-04-29	13:30:00	2016-05-20	21-3-20/5	N	0	0	0	0	0	0	0	0	0	0	0	0	0	0	0		0	0
306	4	PI02	0	T/L21	NBJCU4	NBJCU4-05	Non-inoculated	0	2016-04-29	13:30:00	2016-05-22	21-4-22/5	N	0	0	0	0	0	0	0	0	0	0	0	0	0	0	0		0	0
307	5	PI03	0	T/L21	NBJCU4	NBJCU4-05	Non-inoculated	0	2016-04-29	13:30:00	2016-05-22	21-5-22/5	N	0	0	0	0	0	0	0	0	0	0	0	0	0	0	0		0	0
308	6	PI03	0	T/L21	NBJCU4	NBJCU4-05	Non-inoculated	0	2016-04-29	13:30:00	2016-05-22	21-6-22/5	N	0	0	0	0	0	0	0	0	0	0	0	0	0	0	0		0	0
309	7	PI04	0	T/L21	NBJCU4	NBJCU4-05	Non-inoculated	0	2016-04-29	13:30:00	2016-05-22	21-7-22/5	N	0	0	0	0	0	0	0	0	0	0	0	0	0	0	0		0	0
310	8	PI04	0	T/L21	NBJCU4	NBJCU4-05	Non-inoculated	0	2016-04-29	13:30:00	2016-05-22	21-8-22/5	N	0	0	0	0	0	0	0	0	0	0	0	0	0	0	0		0	0
311	9	PI08	0	T/L21	NBJCU4	NBJCU4-05	Non-inoculated	0	2016-04-29	13:30:00	2016-05-22	21-9-22/5	N	0	0	0	0	0	0	0	0	0	0	0	0	0	0	0		0	0
312	10	PI12	0	T/L21	NBJCU4	NBJCU4-05	Non-inoculated	0	2016-04-29	13:30:00	2016-05-22	21-10-22/5	N	0	0	0	0	0	0	0	0	0	0	0	0	0	0	0		0	0
313	11	PI13	0	T/L21	NBJCU4	NBJCU4-05	Non-inoculated	0	2016-04-29	13:30:00	2016-05-22	21-11-22/5	N	0	0	0	0	0	0	0	0	0	0	0	0	0	0	0		0	0
314	12	PI14	0	T/L21	NBJCU4	NBJCU4-05	Non-inoculated	0	2016-04-29	13:30:00	2016-05-22	21-12-22/5	N	0	0	0	0	0	0	0	0	0	0	0	0	0	0	0		0	0
315	13	PI15	0	T/L21	NBJCU4	NBJCU4-05	Non-inoculated	0	2016-04-29	13:30:00	2016-05-22	21-13-22/5	N	0	0	0	0	0	0	0	0	0	0	0	0	0	0	0		0	0
316	14	PI16	0	T/L21	NBJCU4	NBJCU4-05	Non-inoculated	0	2016-04-29	13:30:00	2016-05-22	21-14-22/5	N	0	0	0	0	0	0	0	0	0	0	0	0	0	0	0		0	0
317	15	PI16	0	T/L21	NBJCU4	NBJCU4-05	Non-inoculated	0	2016-04-29	13:30:00	2016-05-22	21-15-22/5	N	0	0	0	0	0	0	0	0	0	0	0	0	0	0	0		0	0
318	1	PI01	0	T/L22	NBJCU4	NBJCU4-06	Inoculated	1	2016-04-29	10:30:00	2016-05-21	22-1-21/5	N	0	0	0	0	0	0	0	0	0	0	0	0	0	0	0		0	0
319	2	PI01	0	T/L22	NBJCU4	NBJCU4-06	Inoculated	1	2016-04-29	10:30:00	2016-05-21	22-2-21/5	N	0	0	0	0	0	0	0	0	0	0	0	0	0	0	0		0	0
320	3	PI02	0	T/L22	NBJCU4	NBJCU4-06	Inoculated	1	2016-04-29	10:30:00	2016-05-20	22-3-20/5	Y	1	18.5	2.12132	20	5	4	4	4	3	17	1	2	3	6	5		37	37000
321	4	PI02	0	T/L22	NBJCU4	NBJCU4-06	Inoculated	1	2016-04-29	10:30:00	2016-05-20	22-4-20/5	Y	1	19	2.82843	17	4	3	4	3	3	21	3	5	4	3	6		38	38000
322	5	PI02	0	T/L22	NBJCU4	NBJCU4-06	Inoculated	1	2016-04-29	10:30:00	2016-05-20	22-5-20/5	Y	1	18.5	0.707107	18	4	3	4	3	4	19	4	4	4	4	3		37	37000
323	6	PI02	0	T/L22	NBJCU4	NBJCU4-06	Inoculated	1	2016-04-29	10:30:00	2016-05-20	22-6-20/5	Y	1	12	1.41421	11	1	4	2	1	3	13	1	2	1	5	4		24	24000
324	7	PI02	0	T/L22	NBJCU4	NBJCU4-06	Inoculated	1	2016-04-29	10:30:00	2016-05-20	22-7-20/5	Y	1	15	1.41421	14	4	3	2	3	2	16	2	2	2	5	5		30	30000
325	8	PI02	0	T/L22	NBJCU4	NBJCU4-06	Inoculated	1	2016-04-29	10:30:00	2016-05-21	22-8-21/5	Y	1	33	11.3137	25	3	4	7	6	5	41	6	7	9	13	6		66	66000
326	9	PI02	0	T/L22	NBJCU4	NBJCU4-06	Inoculated	1	2016-04-29	10:30:00	2016-05-21	22-9-21/5	Y	1	31.5	6.36396	27	12	4	4	4	3	36	8	7	9	4	8		63	63000
327	10	PI02	0	T/L22	NBJCU4	NBJCU4-06	Inoculated	1	2016-04-29	10:30:00	2016-05-21	22-10-21/5	Y	1	37	4.24264	40	9	16	3	6	6	34	6	7	8	7	6		74	74000
328	11	PI03	0	T/L22	NBJCU4	NBJCU4-06	Inoculated	1	2016-04-29	10:30:00	2016-05-21	22-11-21/5	Y	1	47.5	13.435	38	3	6	13	10	6	57	10	11	12	13	11		95	95000
329	12	PI03	0	T/L22	NBJCU4	NBJCU4-06	Inoculated	1	2016-04-29	10:30:00	2016-05-21	22-12-21/5	Y	1	26	4.24264	29	5	9	5	6	4	23	4	4	3	6	6		52	52000
330	13	PI03	0	T/L22	NBJCU4	NBJCU4-06	Inoculated	1	2016-04-29	10:30:00	2016-05-21	22-13-21/5	Y	1	28	5.65685	32	4	3	8	8	9	24	5	3	7	5	4		56	56000
331	14	PI03	0	T/L22	NBJCU4	NBJCU4-06	Inoculated	1	2016-04-29	10:30:00	2016-05-21	22-14-21/5	Y	1	22	1.41421	21	4	5	4	4	4	23	4	3	4	7	5		44	44000
332	15	PI08	0	T/L22	NBJCU4	NBJCU4-06	Inoculated	1	2016-04-29	10:30:00	2016-05-21	22-15-21/5	N	0	0	0	0	0	0	0	0	0	0	0	0	0	0	0		0	0
333	1	PI01	0	T/L23	NBJCU4	NBJCU4-07	Inoculated	1	2016-04-29	10:30:00	2016-05-21	23-1-21/5	N	0	0	0	0	0	0	0	0	0	0	0	0	0	0	0		0	0
334	2	PI02	0	T/L23	NBJCU4	NBJCU4-07	Inoculated	1	2016-04-29	10:30:00	2016-05-20	23-2-20/5	Y	1	31.5	4.94975	28	4	6	5	4	9	35	6	7	9	9	4		63	63000
335	3	PI02	0	T/L23	NBJCU4	NBJCU4-07	Inoculated	1	2016-04-29	10:30:00	2016-05-20	23-3-20/5	Y	1	29.5	3.53553	32	3	5	8	8	8	27	8	5	6	6	2		59	59000
336	4	PI02	0	T/L23	NBJCU4	NBJCU4-07	Inoculated	1	2016-04-29	10:30:00	2016-05-20	23-4-20/5	Y	1	26.5	3.53553	29	5	8	5	6	5	24	6	2	3	9	4		53	53000
337	5	PI02	0	T/L23	NBJCU4	NBJCU4-07	Inoculated	1	2016-04-29	10:30:00	2016-05-20	23-5-20/5	Y	1	25	2.82843	23	4	6	4	6	3	27	5	6	5	4	7		50	50000
338	6	PI02	0	T/L23	NBJCU4	NBJCU4-07	Inoculated	1	2016-04-29	10:30:00	2016-05-20	23-6-20/5	Y	1	17	4.24264	20	4	6	2	4	4	14	2	7	2	1	2		34	34000
339	7	PI03	0	T/L23	NBJCU4	NBJCU4-07	Inoculated	1	2016-04-29	10:30:00	2016-05-20	23-7-20/5	Y	1	18.5	13.435	28	4	7	9	6	2	9	3	1	1	4	0		37	37000
340	8	PI03	0	T/L23	NBJCU4	NBJCU4-07	Inoculated	1	2016-04-29	10:30:00	2016-05-22	23-8-22/5	Y	1	17	7.07107	22	3	7	5	4	3	12	1	3	2	3	3		34	34000
341	9	PI03	0	T/L23	NBJCU4	NBJCU4-07	Inoculated	1	2016-04-29	10:30:00	2016-05-22	23-9-22/5	Y	1	27	12.7279	18	3	4	4	4	3	36	8	7	9	4	8		54	54000
342	10	PI03	0	T/L23	NBJCU4	NBJCU4-07	Inoculated	1	2016-04-29	10:30:00	2016-05-22	23-10-22/5	Y	1	34.5	0.707107	35	4	16	3	6	6	34	6	7	8	7	6		69	69000
343	11	PI03	0	T/L23	NBJCU4	NBJCU4-07	Inoculated	1	2016-04-29	10:30:00	2016-05-22	23-11-22/5	Y	1	48.5	12.0208	40	5	6	13	10	6	57	10	11	12	13	11		97	97000
344	12	PI04	0	T/L23	NBJCU4	NBJCU4-07	Inoculated	1	2016-04-29	10:30:00	2016-05-22	23-12-22/5	Y	1	26.5	4.94975	30	6	9	5	6	4	23	4	4	3	6	6		53	53000
345	13	PI04	0	T/L23	NBJCU4	NBJCU4-07	Inoculated	1	2016-04-29	10:30:00	2016-05-22	23-13-22/5	Y	1	29	7.07107	34	6	3	8	8	9	24	5	3	7	5	4		58	58000
346	14	PI04	0	T/L23	NBJCU4	NBJCU4-07	Inoculated	1	2016-04-29	10:30:00	2016-05-21	23-14-21/5	N	0	0	0	0	0	0	0	0	0	0	0	0	0	0	0		0	0
347	15	PI0	1	T/L23	NBJCU4	NBJCU4-07	Inoculated	1	2016-04-29	10:30:00					0	0	0	0	0	0	0	0	0	0	0	0	0	0		0	0
348	1	PI02	0	T/L24	NBJCU4	NBJCU4-08	Inoculated	1	2016-04-29	10:30:00	2016-05-20	24-1-20/5	Y	1	22.5	0.707107	22	6	5	4	3	4	23	4	3	4	7	5		45	45000
349	2	PI02	0	T/L24	NBJCU4	NBJCU4-08	Inoculated	1	2016-04-29	10:30:00	2016-05-20	24-2-20/5	Y	1	32.5	3.53553	30	6	6	5	4	9	35	6	7	9	9	4		65	65000
350	3	PI02	0	T/L24	NBJCU4	NBJCU4-08	Inoculated	1	2016-04-29	10:30:00	2016-05-20	24-3-20/5	Y	1	31	5.65685	35	6	5	8	8	8	27	8	5	6	6	2		62	62000
351	4	PI03	0	T/L24	NBJCU4	NBJCU4-08	Inoculated	1	2016-04-29	10:30:00	2016-05-20	24-4-20/5	Y	1	34	9.89949	27	5	4	7	6	5	41	6	7	9	13	6		68	68000
352	5	PI03	0	T/L24	NBJCU4	NBJCU4-08	Inoculated	1	2016-04-29	10:30:00	2016-05-20	24-5-20/5	Y	1	27	12.7279	18	3	4	4	4	3	36	8	7	9	4	8		54	54000
353	6	PI03	0	T/L24	NBJCU4	NBJCU4-08	Inoculated	1	2016-04-29	10:30:00	2016-05-22	24-6-22/5	Y	1	37	4.24264	40	9	16	3	6	6	34	6	7	8	7	6		74	74000
354	7	PI03	0	T/L24	NBJCU4	NBJCU4-08	Inoculated	1	2016-04-29	10:30:00	2016-05-22	24-7-22/5	Y	1	35	5.65685	31	6	4	3	9	9	39	9	9	7	8	6		70	70000
355	8	PI04	0	T/L24	NBJCU4	NBJCU4-08	Inoculated	1	2016-04-29	10:30:00	2016-05-22	24-8-22/5	Y	1	38	9.89949	31	6	6	8	5	6	45	8	7	9	10	11		76	76000
356	9	PI04	0	T/L24	NBJCU4	NBJCU4-08	Inoculated	1	2016-04-29	10:30:00	2016-05-21	24-9-21/5	N	0	0	0	0	0	0	0	0	0	0	0	0	0	0	0		0	0
357	10	PI04	0	T/L24	NBJCU4	NBJCU4-08	Inoculated	1	2016-04-29	10:30:00	2016-05-22	24-10-22/5	Y	1	39	8.48528	33	5	4	9	9	6	45	15	6	6	9	9		78	78000
358	11	PI04	0	T/L24	NBJCU4	NBJCU4-08	Inoculated	1	2016-04-29	10:30:00	2016-05-21	24-11-21/5	N	0	0	0	0	0	0	0	0	0	0	0	0	0	0	0		0	0
359	12	PI05	0	T/L24	NBJCU4	NBJCU4-08	Inoculated	1	2016-04-29	10:30:00	2016-05-22	24-12-22/5	Y	1	29.5	0.707107	29	5	4	8	5	7	30	7	6	8	5	4		59	59000
360	13	PI06	0	T/L24	NBJCU4	NBJCU4-08	Inoculated	1	2016-04-29	10:30:00	2016-05-21	24-13-21/5	N	0	0	0	0	0	0	0	0	0	0	0	0	0	0	0		0	0
361	14	PI07	0	T/L24	NBJCU4	NBJCU4-08	Inoculated	1	2016-04-29	10:30:00	2016-05-21	24-14-21/5	N	0	0	0	0	0	0	0	0	0	0	0	0	0	0	0		0	0
362	15	PI07	0	T/L24	NBJCU4	NBJCU4-08	Inoculated	1	2016-04-29	10:30:00	2016-05-21	24-15-21/5	N	0	0	0	0	0	0	0	0	0	0	0	0	0	0	0		0	0
363	1	PI01	0	T/L25	NBKOA1	NBKOA1-01	Non-inoculated	0	2016-04-28	09:30:00	2016-05-03	25-1-3/5	N	0	0	0	0	0	0	0	0	0	0	0	0	0	0	0		0	0
364	2	PI01	0	T/L25	NBKOA1	NBKOA1-01	Non-inoculated	0	2016-04-28	09:30:00	2016-05-03	25-2-3/5	N	0	0	0	0	0	0	0	0	0	0	0	0	0	0	0		0	0
365	3	PI02	0	T/L25	NBKOA1	NBKOA1-01	Non-inoculated	0	2016-04-28	09:30:00	2016-05-22	25-3-22/5	N	0	0	0	0	0	0	0	0	0	0	0	0	0	0	0		0	0
366	4	PI02	0	T/L25	NBKOA1	NBKOA1-01	Non-inoculated	0	2016-04-28	09:30:00	2016-05-22	25-4-22/5	N	0	0	0	0	0	0	0	0	0	0	0	0	0	0	0		0	0
367	5	PI02	0	T/L25	NBKOA1	NBKOA1-01	Non-inoculated	0	2016-04-28	09:30:00	2016-05-22	25-5-22/5	N	0	0	0	0	0	0	0	0	0	0	0	0	0	0	0		0	0
368	6	PI03	0	T/L25	NBKOA1	NBKOA1-01	Non-inoculated	0	2016-04-28	09:30:00	2016-05-22	25-6-22/5	N	0	0	0	0	0	0	0	0	0	0	0	0	0	0	0		0	0
369	7	PI04	0	T/L25	NBKOA1	NBKOA1-01	Non-inoculated	0	2016-04-28	09:30:00	2016-05-22	25-7-22/5	N	0	0	0	0	0	0	0	0	0	0	0	0	0	0	0		0	0
370	8	PI04	0	T/L25	NBKOA1	NBKOA1-01	Non-inoculated	0	2016-04-28	09:30:00	2016-05-22	25-8-22/5	N	0	0	0	0	0	0	0	0	0	0	0	0	0	0	0		0	0
371	9	PI04	0	T/L25	NBKOA1	NBKOA1-01	Non-inoculated	0	2016-04-28	09:30:00	2016-06-22	25-9-20/6	N	0	0	0	0	0	0	0	0	0	0	0	0	0	0	0		0	0
372	10	PI05	0	T/L25	NBKOA1	NBKOA1-01	Non-inoculated	0	2016-04-28	09:30:00	2016-06-24	25-10-20/6	N	0	0	0	0	0	0	0	0	0	0	0	0	0	0	0		0	0
373	11	PI06	0	T/L25	NBKOA1	NBKOA1-01	Non-inoculated	0	2016-04-28	09:30:00	2016-06-22	25-11-20/6	N	0	0	0	0	0	0	0	0	0	0	0	0	0	0	0		0	0
374	12	PI06	0	T/L25	NBKOA1	NBKOA1-01	Non-inoculated	0	2016-04-28	09:30:00	2016-06-24	25-12-20/6	N	0	0	0	0	0	0	0	0	0	0	0	0	0	0	0		0	0
375	13	PI07	0	T/L25	NBKOA1	NBKOA1-01	Non-inoculated	0	2016-04-28	09:30:00	2016-06-22	25-13-20/6	N	0	0	0	0	0	0	0	0	0	0	0	0	0	0	0		0	0
376	14	PI13	0	T/L25	NBKOA1	NBKOA1-01	Non-inoculated	0	2016-04-28	09:30:00	2016-06-22	25-14-20/6	N	0	0	0	0	0	0	0	0	0	0	0	0	0	0	0		0	0
377	15	PI14	0	T/L25	NBKOA1	NBKOA1-01	Non-inoculated	0	2016-04-28	09:30:00	2016-06-22	25-15-20/6	N	0	0	0	0	0	0	0	0	0	0	0	0	0	0	0		0	0
378	1	PI01	0	T/L26	NBKOA1	NBKOA1-02	Non-inoculated	0	2016-04-28	09:30:00	2016-05-03	26-1-3/5	N	0	0	0	0	0	0	0	0	0	0	0	0	0	0	0		0	0
379	2	PI03	0	T/L26	NBKOA1	NBKOA1-02	Non-inoculated	0	2016-04-28	09:30:00	2016-06-21	26-2-20/6	N	0	0	0	0	0	0	0	0	0	0	0	0	0	0	0		0	0
380	3	PI05	0	T/L26	NBKOA1	NBKOA1-02	Non-inoculated	0	2016-04-28	09:30:00	2016-06-24	26-3-20/6	N	0	0	0	0	0	0	0	0	0	0	0	0	0	0	0		0	0
381	4	PI09	0	T/L26	NBKOA1	NBKOA1-02	Non-inoculated	0	2016-04-28	09:30:00	2016-06-22	26-4-20/6	N	0	0	0	0	0	0	0	0	0	0	0	0	0	0	0		0	0
382	5	PI11	0	T/L26	NBKOA1	NBKOA1-02	Non-inoculated	0	2016-04-28	09:30:00	2016-06-21	26-5-20/6	N	0	0	0	0	0	0	0	0	0	0	0	0	0	0	0		0	0
383	6	PI13	0	T/L26	NBKOA1	NBKOA1-02	Non-inoculated	0	2016-04-28	09:30:00	2016-06-24	26-6-20/6	N	0	0	0	0	0	0	0	0	0	0	0	0	0	0	0		0	0
384	7	PI14	0	T/L26	NBKOA1	NBKOA1-02	Non-inoculated	0	2016-04-28	09:30:00	2016-06-22	26-7-20/6	N	0	0	0	0	0	0	0	0	0	0	0	0	0	0	0		0	0
385	8	PI14	0	T/L26	NBKOA1	NBKOA1-02	Non-inoculated	0	2016-04-28	09:30:00	2016-06-24	26-8-20/6	N	0	0	0	0	0	0	0	0	0	0	0	0	0	0	0		0	0
386	9	PI14	0	T/L26	NBKOA1	NBKOA1-02	Non-inoculated	0	2016-04-28	09:30:00	2016-06-24	26-9-20/6	N	0	0	0	0	0	0	0	0	0	0	0	0	0	0	0		0	0
387	10	PI15	0	T/L26	NBKOA1	NBKOA1-02	Non-inoculated	0	2016-04-28	09:30:00	2016-06-21	26-10-20/6	N	0	0	0	0	0	0	0	0	0	0	0	0	0	0	0		0	0
388	11	PI15	0	T/L26	NBKOA1	NBKOA1-02	Non-inoculated	0	2016-04-28	09:30:00	2016-06-24	26-11-20/6	N	0	0	0	0	0	0	0	0	0	0	0	0	0	0	0		0	0
389	12	PI16	0	T/L26	NBKOA1	NBKOA1-02	Non-inoculated	0	2016-04-28	09:30:00	2016-06-22	26-12-20/6	N	0	0	0	0	0	0	0	0	0	0	0	0	0	0	0		0	0
390	13	PI19	0	T/L26	NBKOA1	NBKOA1-02	Non-inoculated	0	2016-04-28	09:30:00	2016-06-21	26-13-20/6	N	0	0	0	0	0	0	0	0	0	0	0	0	0	0	0		0	0
391	14	PI22	0	T/L26	NBKOA1	NBKOA1-02	Non-inoculated	0	2016-04-28	09:30:00	2016-06-21	26-14-20/6	N	0	0	0	0	0	0	0	0	0	0	0	0	0	0	0		0	0
392	15	PI26	0	T/L26	NBKOA1	NBKOA1-02	Non-inoculated	0	2016-04-28	09:30:00	2016-06-24	26-15-20/6	N	0	0	0	0	0	0	0	0	0	0	0	0	0	0	0		0	0
393	1	PI01	0	T/L27	NBKOA1	NBKOA1-03	Non-inoculated	0	2016-04-28	09:30:00	2016-05-14	27-1-14/5	N	0	0	0	0	0	0	0	0	0	0	0	0	0	0	0		0	0
394	2	PI01	0	T/L27	NBKOA1	NBKOA1-03	Non-inoculated	0	2016-04-28	09:30:00	2016-05-14	27-21-4/5	N	0	0	0	0	0	0	0	0	0	0	0	0	0	0	0		0	0
395	3	PI01	0	T/L27	NBKOA1	NBKOA1-03	Non-inoculated	0	2016-04-28	09:30:00	2016-06-21	27-3-20/6	N	0	0	0	0	0	0	0	0	0	0	0	0	0	0	0		0	0
396	4	PI02	0	T/L27	NBKOA1	NBKOA1-03	Non-inoculated	0	2016-04-28	09:30:00	2016-06-21	27-4-20/6	N	0	0	0	0	0	0	0	0	0	0	0	0	0	0	0		0	0
397	5	PI02	0	T/L27	NBKOA1	NBKOA1-03	Non-inoculated	0	2016-04-28	09:30:00	2016-06-22	27-5-20/6	N	0	0	0	0	0	0	0	0	0	0	0	0	0	0	0		0	0
398	6	PI04	0	T/L27	NBKOA1	NBKOA1-03	Non-inoculated	0	2016-04-28	09:30:00	2016-06-21	27-6-20/6	N	0	0	0	0	0	0	0	0	0	0	0	0	0	0	0		0	0
399	7	PI05	0	T/L27	NBKOA1	NBKOA1-03	Non-inoculated	0	2016-04-28	09:30:00	2016-06-24	27-7-20/6	N	0	0	0	0	0	0	0	0	0	0	0	0	0	0	0		0	0
400	8	PI05	0	T/L27	NBKOA1	NBKOA1-03	Non-inoculated	0	2016-04-28	09:30:00	2016-06-22	27-8-20/6	N	0	0	0	0	0	0	0	0	0	0	0	0	0	0	0		0	0
401	9	PI09	0	T/L27	NBKOA1	NBKOA1-03	Non-inoculated	0	2016-04-28	09:30:00	2016-06-21	27-9-20/6	N	0	0	0	0	0	0	0	0	0	0	0	0	0	0	0		0	0
402	10	PI12	0	T/L27	NBKOA1	NBKOA1-03	Non-inoculated	0	2016-04-28	09:30:00	2016-06-21	27-10-20/6	N	0	0	0	0	0	0	0	0	0	0	0	0	0	0	0		0	0
403	11	PI12	0	T/L27	NBKOA1	NBKOA1-03	Non-inoculated	0	2016-04-28	09:30:00	2016-06-24	27-11-20/6	N	0	0	0	0	0	0	0	0	0	0	0	0	0	0	0		0	0
404	12	PI13	0	T/L27	NBKOA1	NBKOA1-03	Non-inoculated	0	2016-04-28	09:30:00	2016-06-24	27-12-20/6	N	0	0	0	0	0	0	0	0	0	0	0	0	0	0	0		0	0
405	13	PI14	0	T/L27	NBKOA1	NBKOA1-03	Non-inoculated	0	2016-04-28	09:30:00	2016-06-21	27-13-20/6	N	0	0	0	0	0	0	0	0	0	0	0	0	0	0	0		0	0
406	14	PI16	0	T/L27	NBKOA1	NBKOA1-03	Non-inoculated	0	2016-04-28	09:30:00	2016-06-22	27-14-20/6	N	0	0	0	0	0	0	0	0	0	0	0	0	0	0	0		0	0
407	15	PI24	0	T/L27	NBKOA1	NBKOA1-03	Non-inoculated	0	2016-04-28	09:30:00	2016-06-21	27-15-20/6	N	0	0	0	0	0	0	0	0	0	0	0	0	0	0	0		0	0
408	1	PI01	0	T/L28	NBKOA1	NBKOA1-04	Inoculated	1	2016-04-28	09:30:00	2016-05-21	28-1-21/5	N	0	0	0	0	0	0	0	0	0	0	0	0	0	0	0		0	0
409	2	PI01	0	T/L28	NBKOA1	NBKOA1-04	Inoculated	1	2016-04-28	09:30:00	2016-05-21	28-2-21/5	N	0	0	0	0	0	0	0	0	0	0	0	0	0	0	0		0	0
410	3	PI02	0	T/L28	NBKOA1	NBKOA1-04	Inoculated	1	2016-04-28	09:30:00	2016-05-20	28-3-20/5	Y	1	30.5	2.12132	29	4	4	8	7	6	32	5	6	5	8	8		61	61000
411	4	PI02	0	T/L28	NBKOA1	NBKOA1-04	Inoculated	1	2016-04-28	09:30:00	2016-05-20	28-4-20/5	Y	1	14.5	0.707107	14	3	3	4	2	2	15	2	2	4	3	4		29	29000
412	5	PI03	0	T/L28	NBKOA1	NBKOA1-04	Inoculated	1	2016-04-28	09:30:00	2016-05-20	28-5-20/5	Y	1	28.5	0.707107	29	5	6	5	7	6	28	7	6	6	6	3		57	57000
413	6	PI03	0	T/L28	NBKOA1	NBKOA1-04	Inoculated	1	2016-04-28	09:30:00	2016-05-20	28-6-20/5	Y	1	31	8.48528	37	8	8	9	6	6	25	6	5	5	5	4		62	62000
414	7	PI03	0	T/L28	NBKOA1	NBKOA1-04	Inoculated	1	2016-04-28	09:30:00	2016-05-20	28-7-20/5	Y	1	58	12.7279	67	11	18	17	11	10	49	9	7	7	11	15		116	116000
415	8	PI03	0	T/L28	NBKOA1	NBKOA1-04	Inoculated	1	2016-04-28	09:30:00	2016-05-20	28-8-20/5	Y	1	45	7.07107	50	9	8	8	11	14	40	6	5	9	13	7		90	90000
416	9	PI04	0	T/L28	NBKOA1	NBKOA1-04	Inoculated	1	2016-04-28	09:30:00	2016-05-21	28-9-21/5	N	0	0	0	0	0	0	0	0	0	0	0	0	0	0	0		0	0
417	10	PI04	0	T/L28	NBKOA1	NBKOA1-04	Inoculated	1	2016-04-28	09:30:00	2016-05-22	28-10-22/5	Y	1	39.5	2.12132	38	8	8	8	8	6	41	6	8	8	8	11		79	79000
418	11	PI04	0	T/L28	NBKOA1	NBKOA1-04	Inoculated	1	2016-04-28	09:30:00	2016-05-22	28-11-22/5	Y	1	51.5	3.53553	49	6	9	9	11	14	54	11	8	9	11	15		103	103000
419	12	PI04	0	T/L28	NBKOA1	NBKOA1-04	Inoculated	1	2016-04-28	09:30:00	2016-05-22	28-12-22/5	Y	1	41.5	4.94975	38	9	8	7	7	7	45	7	6	7	11	14		83	83000
420	13	PI04	0	T/L28	NBKOA1	NBKOA1-04	Inoculated	1	2016-04-28	09:30:00	2016-05-21	28-13-21/5	N	0	0	0	0	0	0	0	0	0	0	0	0	0	0	0		0	0
421	14	PI06	0	T/L28	NBKOA1	NBKOA1-04	Inoculated	1	2016-04-28	09:30:00	2016-05-21	28-14-21/5	N	0	0	0	0	0	0	0	0	0	0	0	0	0	0	0		0	0
422	15	PI0	1	T/L28	NBKOA1	NBKOA1-04	Inoculated	1	2016-04-28	09:30:00					0	0	0	0	0	0	0	0	0	0	0	0	0	0		0	0
423	1	PI01	0	T/L29	NBKOA1	NBKOA1-05	Inoculated	1	2016-04-28	09:30:00	2016-05-21	29-1-21/5	N	0	0	0	0	0	0	0	0	0	0	0	0	0	0	0		0	0
424	2	PI02	0	T/L29	NBKOA1	NBKOA1-05	Inoculated	1	2016-04-28	09:30:00	2016-05-20	29-2-20/5	Y	1	44.5	6.36396	49	11	17	9	6	6	40	6	7	8	11	8		89	89000
425	3	PI02	0	T/L29	NBKOA1	NBKOA1-05	Inoculated	1	2016-04-28	09:30:00	2016-05-20	29-3-20/5	Y	1	47.5	4.94975	51	12	9	11	8	11	44	17	4	5	7	11		95	95000
426	4	PI03	0	T/L29	NBKOA1	NBKOA1-05	Inoculated	1	2016-04-28	09:30:00	2016-05-20	29-4-20/5	Y	1	34.5	0.707107	35	5	7	8	7	8	34	7	7	7	8	5		69	69000
427	5	PI03	0	T/L29	NBKOA1	NBKOA1-05	Inoculated	1	2016-04-28	09:30:00	2016-05-20	29-5-20/5	Y	1	26.5	4.94975	30	4	8	5	7	6	23	6	8	5	4	0		53	53000
428	6	PI03	0	T/L29	NBKOA1	NBKOA1-05	Inoculated	1	2016-04-28	09:30:00	2016-05-20	29-6-20/5	Y	1	30	4.24264	33	4	8	7	6	8	27	6	5	8	8	0		60	60000
429	7	PI03	0	T/L29	NBKOA1	NBKOA1-05	Inoculated	1	2016-04-28	09:30:00	2016-05-20	29-7-20/5	Y	1	15.5	3.53553	18	3	4	2	2	7	13	2	4	3	4	0		31	31000
430	8	PI03	0	T/L29	NBKOA1	NBKOA1-05	Inoculated	1	2016-04-28	09:30:00	2016-05-20	29-8-20/5	Y	1	25.5	6.36396	30	6	5	7	6	6	21	6	6	6	3	0		51	51000
431	9	PI04	0	T/L29	NBKOA1	NBKOA1-05	Inoculated	1	2016-04-28	09:30:00	2016-05-20	29-9-20/5	Y	1	28	12.7279	37	8	9	6	6	8	19	5	5	5	4	0		56	56000
432	10	PI04	0	T/L29	NBKOA1	NBKOA1-05	Inoculated	1	2016-04-28	09:30:00	2016-05-21	29-10-21/5	N	0	0	0	0	0	0	0	0	0	0	0	0	0	0	0		0	0
433	11	PI04	0	T/L29	NBKOA1	NBKOA1-05	Inoculated	1	2016-04-28	09:30:00	2016-05-22	29-11-22/5	Y	1	51.5	16.2635	63	18	17	11	10	7	40	7	7	11	15	0		103	103000
434	12	PI05	0	T/L29	NBKOA1	NBKOA1-05	Inoculated	1	2016-04-28	09:30:00	2016-05-21	29-12-21/5	N	0	0	0	0	0	0	0	0	0	0	0	0	0	0	0		0	0
435	13	PI07	0	T/L29	NBKOA1	NBKOA1-05	Inoculated	1	2016-04-28	09:30:00	2016-05-21	29-13-21/5	N	0	0	0	0	0	0	0	0	0	0	0	0	0	0	0		0	0
436	14	PI08	0	T/L29	NBKOA1	NBKOA1-05	Inoculated	1	2016-04-28	09:30:00	2016-05-21	29-14-21/5	N	0	0	0	0	0	0	0	0	0	0	0	0	0	0	0		0	0
437	15	PI10	0	T/L29	NBKOA1	NBKOA1-05	Inoculated	1	2016-04-28	09:30:00	2016-05-21	29-15-21/5	N	0	0	0	0	0	0	0	0	0	0	0	0	0	0	0		0	0
438	1	PI01	0	T/L30	NBKOA1	NBKOA1-06	Inoculated	1	2016-04-28	09:30:00	2016-05-20	30-1-20/5	Y	1	42.5	2.12132	44	7	7	9	12	9	41	11	9	5	4	12		85	85000
439	2	PI01	0	T/L30	NBKOA1	NBKOA1-06	Inoculated	1	2016-04-28	09:30:00	2016-05-21	30-2-21/5	N	0	0	0	0	0	0	0	0	0	0	0	0	0	0	0		0	0
440	3	PI01	0	T/L30	NBKOA1	NBKOA1-06	Inoculated	1	2016-04-28	09:30:00	2016-05-21	30-3-21/5	N	0	0	0	0	0	0	0	0	0	0	0	0	0	0	0		0	0
441	4	PI02	0	T/L30	NBKOA1	NBKOA1-06	Inoculated	1	2016-04-28	09:30:00	2016-05-20	30-4-20/5	Y	1	35.5	12.0208	44	8	11	9	9	7	27	6	9	4	5	3		71	71000
442	5	PI02	0	T/L30	NBKOA1	NBKOA1-06	Inoculated	1	2016-04-28	09:30:00	2016-05-20	30-5-20/5	Y	1	28	4.24264	31	6	6	7	8	4	25	4	5	5	8	3		56	56000
443	6	PI02	0	T/L30	NBKOA1	NBKOA1-06	Inoculated	1	2016-04-28	09:30:00	2016-05-20	30-6-20/5	Y	1	27	5.65685	31	7	7	6	6	5	23	5	5	6	4	3		54	54000
444	7	PI02	0	T/L30	NBKOA1	NBKOA1-06	Inoculated	1	2016-04-28	09:30:00	2016-05-20	30-7-20/5	Y	1	28	4.24264	31	6	6	7	8	4	25	4	5	5	8	3		56	56000
445	8	PI02	0	T/L30	NBKOA1	NBKOA1-06	Inoculated	1	2016-04-28	09:30:00	2016-05-20	30-8-20/5	Y	1	20.5	2.12132	22	5	4	4	5	4	19	3	3	4	4	5		41	41000
446	9	PI03	0	T/L30	NBKOA1	NBKOA1-06	Inoculated	1	2016-04-28	09:30:00	2016-05-20	30-9-20/5	Y	1	25.5	2.12132	24	5	4	4	5	6	27	6	6	6	5	4		51	51000
447	10	PI03	0	T/L30	NBKOA1	NBKOA1-06	Inoculated	1	2016-04-28	09:30:00	2016-05-20	30-10-20/5	Y	1	29	5.65685	33	5	9	6	6	7	25	4	5	6	5	5		58	58000
448	11	PI03	0	T/L30	NBKOA1	NBKOA1-06	Inoculated	1	2016-04-28	09:30:00	2016-05-20	30-11-20/5	Y	1	35.5	7.77817	41	7	8	6	9	11	30	7	6	7	7	3		71	71000
449	12	PI03	0	T/L30	NBKOA1	NBKOA1-06	Inoculated	1	2016-04-28	09:30:00	2016-05-20	30-12-20/5	Y	1	35.5	12.0208	44	8	11	9	9	7	27	6	9	4	5	3		71	71000
450	13	PI04	0	T/L30	NBKOA1	NBKOA1-06	Inoculated	1	2016-04-28	09:30:00	2016-05-20	30-13-20/5	Y	1	28	4.24264	31	6	6	7	8	4	25	4	5	5	8	3		56	56000
451	14	PI05	0	T/L30	NBKOA1	NBKOA1-06	Inoculated	1	2016-04-28	09:30:00	2016-05-21	30-14-21/5	N	0	0	0	0	0	0	0	0	0	0	0	0	0	0	0		0	0
452	15	PI06	0	T/L30	NBKOA1	NBKOA1-06	Inoculated	1	2016-04-28	09:30:00	2016-05-21	30-15-21/5	N	0	0	0	0	0	0	0	0	0	0	0	0	0	0	0		0	0
453	1	PI01	0	T/L31	NBKOA1	NBKOA1-07	Non-inoculated	0	2016-04-28	09:30:00	2016-03-14	31-1-14/5	N	0	0	0	0	0	0	0	0	0	0	0	0	0	0	0		0	0
454	2	PI01	0	T/L31	NBKOA1	NBKOA1-07	Non-inoculated	0	2016-04-28	09:30:00	2016-05-14	31-2-14/5	N	0	0	0	0	0	0	0	0	0	0	0	0	0	0	0		0	0
455	3	PI02	0	T/L31	NBKOA1	NBKOA1-07	Non-inoculated	0	2016-04-28	09:30:00	2016-05-14	31-3-14/5	N	0	0	0	0	0	0	0	0	0	0	0	0	0	0	0		0	0
456	4	PI04	0	T/L31	NBKOA1	NBKOA1-07	Non-inoculated	0	2016-04-28	09:30:00	2016-05-14	31-4-14/5	N	0	0	0	0	0	0	0	0	0	0	0	0	0	0	0		0	0
457	5	PI05	0	T/L31	NBKOA1	NBKOA1-07	Non-inoculated	0	2016-04-28	09:30:00	2016-05-18	31-5-18/5	N	0	0	0	0	0	0	0	0	0	0	0	0	0	0	0		0	0
458	6	PI13	0	T/L31	NBKOA1	NBKOA1-07	Non-inoculated	0	2016-04-28	09:30:00	2016-05-20	31-6-20/5	N	0	0	0	0	0	0	0	0	0	0	0	0	0	0	0		0	0
459	7	PI17	0	T/L31	NBKOA1	NBKOA1-07	Non-inoculated	0	2016-04-28	09:30:00	2016-06-22	31-7-20/6	N	0	0	0	0	0	0	0	0	0	0	0	0	0	0	0		0	0
460	8	PI17	0	T/L31	NBKOA1	NBKOA1-07	Non-inoculated	0	2016-04-28	09:30:00	2016-06-21	31-8-20/6	N	0	0	0	0	0	0	0	0	0	0	0	0	0	0	0		0	0
461	9	PI18	0	T/L31	NBKOA1	NBKOA1-07	Non-inoculated	0	2016-04-28	09:30:00	2016-06-21	31-9-20/6	N	0	0	0	0	0	0	0	0	0	0	0	0	0	0	0		0	0
462	10	PI19	0	T/L31	NBKOA1	NBKOA1-07	Non-inoculated	0	2016-04-28	09:30:00	2016-06-21	31-10-20/6	N	0	0	0	0	0	0	0	0	0	0	0	0	0	0	0		0	0
463	11	PI19	0	T/L31	NBKOA1	NBKOA1-07	Non-inoculated	0	2016-04-28	09:30:00	2016-06-21	31-11-20/6	N	0	0	0	0	0	0	0	0	0	0	0	0	0	0	0		0	0
464	12	PI19	0	T/L31	NBKOA1	NBKOA1-07	Non-inoculated	0	2016-04-28	09:30:00	2016-06-21	31-12-20/6	N	0	0	0	0	0	0	0	0	0	0	0	0	0	0	0		0	0
465	13	PI20	0	T/L31	NBKOA1	NBKOA1-07	Non-inoculated	0	2016-04-28	09:30:00	2016-06-21	31-13-20/6	N	0	0	0	0	0	0	0	0	0	0	0	0	0	0	0		0	0
466	14	PI20	0	T/L31	NBKOA1	NBKOA1-07	Non-inoculated	0	2016-04-28	09:30:00	2016-06-22	31-14-20/6	N	0	0	0	0	0	0	0	0	0	0	0	0	0	0	0		0	0
467	15	PI21	0	T/L31	NBKOA1	NBKOA1-07	Non-inoculated	0	2016-04-28	09:30:00	2016-06-22	31-15-20/6	N	0	0	0	0	0	0	0	0	0	0	0	0	0	0	0		0	0
468	1	PI01	0	T/L32	NBKOA1	NBKOA1-08	Inoculated	1	2016-04-28	09:30:00	2016-05-21	32-1-21/5	N	0	0	0	0	0	0	0	0	0	0	0	0	0	0	0		0	0
469	2	PI02	0	T/L32	NBKOA1	NBKOA1-08	Inoculated	1	2016-04-28	09:30:00	2016-05-20	32-2-20/5	Y	1	27.5	0.707107	28	5	6	5	6	6	27	4	6	5	6	6		55	55000
470	3	PI02	0	T/L32	NBKOA1	NBKOA1-08	Inoculated	1	2016-04-28	09:30:00	2016-05-20	32-3-20/5	Y	1	24	1.41421	25	6	5	4	5	5	23	5	5	5	5	3		48	48000
471	4	PI02	0	T/L32	NBKOA1	NBKOA1-08	Inoculated	1	2016-04-28	09:30:00	2016-05-20	32-4-20/5	Y	1	35.5	12.0208	44	8	11	9	9	7	27	6	9	4	5	3		71	71000
472	5	PI03	0	T/L32	NBKOA1	NBKOA1-08	Inoculated	1	2016-04-28	09:30:00	2016-05-20	32-5-20/5	Y	1	28	4.24264	31	6	6	7	8	4	25	4	5	5	8	3		56	56000
473	6	PI03	0	T/L32	NBKOA1	NBKOA1-08	Inoculated	1	2016-04-28	09:30:00	2016-05-20	32-6-20/5	Y	1	18.5	0.707107	18	4	3	4	3	4	19	4	4	4	4	3		37	37000
474	7	PI03	0	T/L32	NBKOA1	NBKOA1-08	Inoculated	1	2016-04-28	09:30:00	2016-05-20	32-7-20/5	Y	1	12	1.41421	11	1	4	2	1	3	13	1	2	1	5	4		24	24000
475	8	PI04	0	T/L32	NBKOA1	NBKOA1-08	Inoculated	1	2016-04-28	09:30:00	2016-05-20	32-8-20/5	Y	1	15	1.41421	14	4	3	2	3	2	16	2	2	2	5	5		30	30000
476	9	PI04	0	T/L32	NBKOA1	NBKOA1-08	Inoculated	1	2016-04-28	09:30:00	2016-05-20	32-9-20/5	Y	1	33	11.3137	25	3	4	7	6	5	41	6	7	9	13	6		66	66000
477	10	PI04	0	T/L32	NBKOA1	NBKOA1-08	Inoculated	1	2016-04-28	09:30:00	2016-05-21	32-10-21/5	N	0	0	0	0	0	0	0	0	0	0	0	0	0	0	0		0	0
478	11	PI05	0	T/L32	NBKOA1	NBKOA1-08	Inoculated	1	2016-04-28	09:30:00	2016-06-24	32-11-20/6	N	0	0	0	0	0	0	0	0	0	0	0	0	0	0	0		0	0
479	12	PI05	0	T/L32	NBKOA1	NBKOA1-08	Inoculated	1	2016-04-28	09:30:00	2016-06-21	32-12-20/6	N	0	0	0	0	0	0	0	0	0	0	0	0	0	0	0		0	0
480	13	PI07	0	T/L32	NBKOA1	NBKOA1-08	Inoculated	1	2016-04-28	09:30:00	2016-06-24	32-13-20/6	N	0	0	0	0	0	0	0	0	0	0	0	0	0	0	0		0	0
481	14	PI07	0	T/L32	NBKOA1	NBKOA1-08	Inoculated	1	2016-04-28	09:30:00	2016-05-22	32-14-22/5	Y	1	37	5.65685	41	9	8	8	8	8	33	8	7	6	6	6		74	74000
482	15	PI07	0	T/L32	NBKOA1	NBKOA1-08	Inoculated	1	2016-04-28	09:30:00	2016-06-21	32-15-20/6	N	0	0	0	0	0	0	0	0	0	0	0	0	0	0	0		0	0
483	1	PI01	0	T/L33	NBKUR3	NBKUR3-01	Non-inoculated	0	2016-04-28	12:00:00	2016-05-17	33-1-17/5	N	0	0	0	0	0	0	0	0	0	0	0	0	0	0	0		0	0
484	2	PI02	0	T/L33	NBKUR3	NBKUR3-01	Non-inoculated	0	2016-04-28	12:00:00	2016-05-17	33-2-17/5	N	0	0	0	0	0	0	0	0	0	0	0	0	0	0	0		0	0
485	3	PI02	0	T/L33	NBKUR3	NBKUR3-01	Non-inoculated	0	2016-04-28	12:00:00	2016-05-17	33-3-17/5	N	0	0	0	0	0	0	0	0	0	0	0	0	0	0	0		0	0
486	4	PI04	0	T/L33	NBKUR3	NBKUR3-01	Non-inoculated	0	2016-04-28	12:00:00	2016-06-24	33-4-20/6	N	0	0	0	0	0	0	0	0	0	0	0	0	0	0	0		0	0
487	5	PI06	0	T/L33	NBKUR3	NBKUR3-01	Non-inoculated	0	2016-04-28	12:00:00	2016-06-22	33-5-20/6	N	0	0	0	0	0	0	0	0	0	0	0	0	0	0	0		0	0
488	6	PI08	0	T/L33	NBKUR3	NBKUR3-01	Non-inoculated	0	2016-04-28	12:00:00	2016-06-28	33-6-20/6	N	0	0	0	0	0	0	0	0	0	0	0	0	0	0	0		0	0
489	7	PI09	0	T/L33	NBKUR3	NBKUR3-01	Non-inoculated	0	2016-04-28	12:00:00	2016-06-28	33-7-20/6	N	0	0	0	0	0	0	0	0	0	0	0	0	0	0	0		0	0
490	8	PI10	0	T/L33	NBKUR3	NBKUR3-01	Non-inoculated	0	2016-04-28	12:00:00	2016-06-28	33-8-20/6	N	0	0	0	0	0	0	0	0	0	0	0	0	0	0	0		0	0
491	9	PI11	0	T/L33	NBKUR3	NBKUR3-01	Non-inoculated	0	2016-04-28	12:00:00	2016-06-28	33-9-20/6	N	0	0	0	0	0	0	0	0	0	0	0	0	0	0	0		0	0
492	10	PI12	0	T/L33	NBKUR3	NBKUR3-01	Non-inoculated	0	2016-04-28	12:00:00	2016-06-28	33-10-20/6	N	0	0	0	0	0	0	0	0	0	0	0	0	0	0	0		0	0
493	11	PI12	0	T/L33	NBKUR3	NBKUR3-01	Non-inoculated	0	2016-04-28	12:00:00	2016-06-21	33-11-20/6	N	0	0	0	0	0	0	0	0	0	0	0	0	0	0	0		0	0
494	12	PI13	0	T/L33	NBKUR3	NBKUR3-01	Non-inoculated	0	2016-04-28	12:00:00	2016-06-21	33-12-20/6	N	0	0	0	0	0	0	0	0	0	0	0	0	0	0	0		0	0
495	13	PI13	0	T/L33	NBKUR3	NBKUR3-01	Non-inoculated	0	2016-04-28	12:00:00	2016-06-21	33-13-20/6	N	0	0	0	0	0	0	0	0	0	0	0	0	0	0	0		0	0
496	14	PI14	0	T/L33	NBKUR3	NBKUR3-01	Non-inoculated	0	2016-04-28	12:00:00	2016-06-24	33-14-20/6	N	0	0	0	0	0	0	0	0	0	0	0	0	0	0	0		0	0
497	15	PI14	0	T/L33	NBKUR3	NBKUR3-01	Non-inoculated	0	2016-04-28	12:00:00	2016-06-21	33-15-20/6	N	0	0	0	0	0	0	0	0	0	0	0	0	0	0	0		0	0
498	1	PI01	0	T/L34	NBKUR3	NBKUR3-02	Non-inoculated	0	2016-04-28	12:00:00	2016-05-08	34-1-8/5	N	0	0	0	0	0	0	0	0	0	0	0	0	0	0	0		0	0
499	2	PI01	0	T/L34	NBKUR3	NBKUR3-02	Non-inoculated	0	2016-04-28	12:00:00	2016-05-08	34-2-8/5	N	0	0	0	0	0	0	0	0	0	0	0	0	0	0	0		0	0
500	3	PI01	0	T/L34	NBKUR3	NBKUR3-02	Non-inoculated	0	2016-04-28	12:00:00	2016-05-08	34-3-8/5	N	0	0	0	0	0	0	0	0	0	0	0	0	0	0	0		0	0
501	4	PI02	0	T/L34	NBKUR3	NBKUR3-02	Non-inoculated	0	2016-04-28	12:00:00	2016-05-17	34-4-17/5	N	0	0	0	0	0	0	0	0	0	0	0	0	0	0	0		0	0
502	5	PI02	0	T/L34	NBKUR3	NBKUR3-02	Non-inoculated	0	2016-04-28	12:00:00	2016-05-17	34-5-17/5	N	0	0	0	0	0	0	0	0	0	0	0	0	0	0	0		0	0
503	6	PI02	0	T/L34	NBKUR3	NBKUR3-02	Non-inoculated	0	2016-04-28	12:00:00	2016-05-17	34-6-17/5	N	0	0	0	0	0	0	0	0	0	0	0	0	0	0	0		0	0
504	7	PI03	0	T/L34	NBKUR3	NBKUR3-02	Non-inoculated	0	2016-04-28	12:00:00	2016-06-24	34-7-20/6	N	0	0	0	0	0	0	0	0	0	0	0	0	0	0	0		0	0
505	8	PI04	0	T/L34	NBKUR3	NBKUR3-02	Non-inoculated	0	2016-04-28	12:00:00	2016-06-24	34-8-20/6	N	0	0	0	0	0	0	0	0	0	0	0	0	0	0	0		0	0
506	9	PI04	0	T/L34	NBKUR3	NBKUR3-02	Non-inoculated	0	2016-04-28	12:00:00	2016-06-21	34-9-20/6	N	0	0	0	0	0	0	0	0	0	0	0	0	0	0	0		0	0
507	10	PI05	0	T/L34	NBKUR3	NBKUR3-02	Non-inoculated	0	2016-04-28	12:00:00	2016-06-21	34-10-20/6	N	0	0	0	0	0	0	0	0	0	0	0	0	0	0	0		0	0
508	11	PI08	0	T/L34	NBKUR3	NBKUR3-02	Non-inoculated	0	2016-04-28	12:00:00	2016-06-21	34-11-20/6	N	0	0	0	0	0	0	0	0	0	0	0	0	0	0	0		0	0
509	12	PI12	0	T/L34	NBKUR3	NBKUR3-02	Non-inoculated	0	2016-04-28	12:00:00	2016-06-21	34-12-20/6	N	0	0	0	0	0	0	0	0	0	0	0	0	0	0	0		0	0
510	13	PI13	0	T/L34	NBKUR3	NBKUR3-02	Non-inoculated	0	2016-04-28	12:00:00	2016-06-24	34-13-20/6	N	0	0	0	0	0	0	0	0	0	0	0	0	0	0	0		0	0
511	14	PI14	0	T/L34	NBKUR3	NBKUR3-02	Non-inoculated	0	2016-04-28	12:00:00	2016-06-21	34-14-20/6	N	0	0	0	0	0	0	0	0	0	0	0	0	0	0	0		0	0
512	15	PI14	0	T/L34	NBKUR3	NBKUR3-02	Non-inoculated	0	2016-04-28	12:00:00	2016-06-21	34-15-20/6	N	0	0	0	0	0	0	0	0	0	0	0	0	0	0	0		0	0
513	1	PI01	0	T/L35	NBKUR3	NBKUR3-03	Non-inoculated	0	2016-04-28	12:00:00	2016-05-12	35-1-12/5	N	0	0	0	0	0	0	0	0	0	0	0	0	0	0	0		0	0
514	2	PI01	0	T/L35	NBKUR3	NBKUR3-03	Non-inoculated	0	2016-04-28	12:00:00	2016-05-12	35-2-12/5	Y	1	18.5	4.94975	22	3	4	6	6	3	15	3	3	4	2	3		37	37000
515	3	PI01	0	T/L35	NBKUR3	NBKUR3-03	Non-inoculated	0	2016-04-28	12:00:00	2016-05-12	35-3-12/5	N	0	0	0	0	0	0	0	0	0	0	0	0	0	0	0		0	0
516	4	PI02	0	T/L35	NBKUR3	NBKUR3-03	Non-inoculated	0	2016-04-28	12:00:00	2016-05-17	35-4-17/5	N	0	0	0	0	0	0	0	0	0	0	0	0	0	0	0		0	0
517	5	PI03	0	T/L35	NBKUR3	NBKUR3-03	Non-inoculated	0	2016-04-28	12:00:00	2016-05-17	35-5-17/5	N	0	0	0	0	0	0	0	0	0	0	0	0	0	0	0		0	0
518	6	PI04	0	T/L35	NBKUR3	NBKUR3-03	Non-inoculated	0	2016-04-28	12:00:00	2016-06-22	35-6-20/6	N	0	0	0	0	0	0	0	0	0	0	0	0	0	0	0		0	0
519	7	PI04	0	T/L35	NBKUR3	NBKUR3-03	Non-inoculated	0	2016-04-28	12:00:00	2016-06-21	35-7-20/6	N	0	0	0	0	0	0	0	0	0	0	0	0	0	0	0		0	0
520	8	PI04	0	T/L35	NBKUR3	NBKUR3-03	Non-inoculated	0	2016-04-28	12:00:00	2016-06-21	35-8-20/6	N	0	0	0	0	0	0	0	0	0	0	0	0	0	0	0		0	0
521	9	PI04	0	T/L35	NBKUR3	NBKUR3-03	Non-inoculated	0	2016-04-28	12:00:00	2016-06-22	35-9-20/6	N	0	0	0	0	0	0	0	0	0	0	0	0	0	0	0		0	0
522	10	PI05	0	T/L35	NBKUR3	NBKUR3-03	Non-inoculated	0	2016-04-28	12:00:00	2016-06-22	35-10-20/6	N	0	0	0	0	0	0	0	0	0	0	0	0	0	0	0		0	0
523	11	PI05	0	T/L35	NBKUR3	NBKUR3-03	Non-inoculated	0	2016-04-28	12:00:00	2016-06-21	35-11-20/6	N	0	0	0	0	0	0	0	0	0	0	0	0	0	0	0		0	0
524	12	PI12	0	T/L35	NBKUR3	NBKUR3-03	Non-inoculated	0	2016-04-28	12:00:00	2016-06-21	35-12-20/6	N	0	0	0	0	0	0	0	0	0	0	0	0	0	0	0		0	0
525	13	PI13	0	T/L35	NBKUR3	NBKUR3-03	Non-inoculated	0	2016-04-28	12:00:00	2016-06-24	35-13-20/6	N	0	0	0	0	0	0	0	0	0	0	0	0	0	0	0		0	0
526	14	PI16	0	T/L35	NBKUR3	NBKUR3-03	Non-inoculated	0	2016-04-28	12:00:00	2016-06-21	35-14-20/6	N	0	0	0	0	0	0	0	0	0	0	0	0	0	0	0		0	0
527	15	PI16	0	T/L35	NBKUR3	NBKUR3-03	Non-inoculated	0	2016-04-28	12:00:00	2016-06-22	35-15-20/6	N	0	0	0	0	0	0	0	0	0	0	0	0	0	0	0		0	0
528	1	PI01	0	T/L36	NBKUR3	NBKUR3-04	Inoculated	1	2016-04-28	12:00:00	2016-06-21	36-1-20/6	N	0	0	0	0	0	0	0	0	0	0	0	0	0	0	0		0	0
529	2	PI01	0	T/L36	NBKUR3	NBKUR3-04	Inoculated	1	2016-04-28	12:00:00	2016-06-24	36-2-20/6	N	0	0	0	0	0	0	0	0	0	0	0	0	0	0	0		0	0
530	3	PI01	0	T/L36	NBKUR3	NBKUR3-04	Inoculated	1	2016-04-28	12:00:00	2016-06-21	36-3-20/6	N	0	0	0	0	0	0	0	0	0	0	0	0	0	0	0		0	0
531	4	PI02	0	T/L36	NBKUR3	NBKUR3-04	Inoculated	1	2016-04-28	12:00:00	2016-05-20	36-4-20/5	Y	1	17	1.41421	18	5	2	2	6	3	16	3	4	3	3	3		34	34000
532	5	PI02	0	T/L36	NBKUR3	NBKUR3-04	Inoculated	1	2016-04-28	12:00:00	2016-05-20	36-5-20/5	Y	1	22	1.41421	21	4	5	4	4	4	23	4	3	4	7	5		44	44000
533	6	PI03	0	T/L36	NBKUR3	NBKUR3-04	Inoculated	1	2016-04-28	12:00:00	2016-05-20	36-6-20/5	Y	1	31.5	4.94975	28	4	6	5	4	9	35	6	7	9	9	4		63	63000
534	7	PI03	0	T/L36	NBKUR3	NBKUR3-04	Inoculated	1	2016-04-28	12:00:00	2016-05-20	36-7-20/5	Y	1	29.5	3.53553	32	3	5	8	8	8	27	8	5	6	6	2		59	59000
535	8	PI03	0	T/L36	NBKUR3	NBKUR3-04	Inoculated	1	2016-04-28	12:00:00	2016-05-22	36-8-22/5	Y	1	26.5	3.53553	29	5	8	5	6	5	24	6	2	3	9	4		53	53000
536	9	PI04	0	T/L36	NBKUR3	NBKUR3-04	Inoculated	1	2016-04-28	12:00:00	2016-05-22	36-9-22/5	Y	1	25	2.82843	23	4	6	4	6	3	27	5	6	5	4	7		50	50000
537	10	PI04	0	T/L36	NBKUR3	NBKUR3-04	Inoculated	1	2016-04-28	12:00:00	2016-05-22	36-10-22/5	Y	1	35.5	12.0208	44	8	11	9	9	7	27	6	9	4	5	3		71	71000
538	11	PI04	0	T/L36	NBKUR3	NBKUR3-04	Inoculated	1	2016-04-28	12:00:00	2016-05-22	36-11-22/5	Y	1	28	4.24264	31	6	6	7	8	4	25	4	5	5	8	3		56	56000
539	12	PI04	0	T/L36	NBKUR3	NBKUR3-04	Inoculated	1	2016-04-28	12:00:00	2016-06-28	36-12-20/6	N	0	0	0	0	0	0	0	0	0	0	0	0	0	0	0		0	0
540	13	PI04	0	T/L36	NBKUR3	NBKUR3-04	Inoculated	1	2016-04-28	12:00:00	2016-06-21	36-13-20/6	N	0	0	0	0	0	0	0	0	0	0	0	0	0	0	0		0	0
541	14	PI05	0	T/L36	NBKUR3	NBKUR3-04	Inoculated	1	2016-04-28	12:00:00	2016-06-22	36-14-20/6	N	0	0	0	0	0	0	0	0	0	0	0	0	0	0	0		0	0
542	15	PI06	0	T/L36	NBKUR3	NBKUR3-04	Inoculated	1	2016-04-28	12:00:00	2016-06-21	36-15-20/6	N	0	0	0	0	0	0	0	0	0	0	0	0	0	0	0		0	0
543	1	PI01	0	T/L37	NBKUR3	NBKUR3-05	Inoculated	1	2016-04-28	12:00:00	2016-06-21	37-1-20/6	N	0	0	0	0	0	0	0	0	0	0	0	0	0	0	0		0	0
544	2	PI01	0	T/L37	NBKUR3	NBKUR3-05	Inoculated	1	2016-04-28	12:00:00	2016-06-22	37-2-20/6	N	0	0	0	0	0	0	0	0	0	0	0	0	0	0	0		0	0
545	3	PI01	0	T/L37	NBKUR3	NBKUR3-05	Inoculated	1	2016-04-28	12:00:00	2016-06-21	37-3-20/6	N	0	0	0	0	0	0	0	0	0	0	0	0	0	0	0		0	0
546	4	PI02	0	T/L37	NBKUR3	NBKUR3-05	Inoculated	1	2016-04-28	12:00:00	2016-05-20	37-4-20/5	Y	1	18.5	0.707107	18	4	3	4	3	4	19	4	4	4	4	3		37	37000
547	5	PI02	0	T/L37	NBKUR3	NBKUR3-05	Inoculated	1	2016-04-28	12:00:00	2016-05-20	37-5-20/5	Y	1	12	1.41421	11	1	4	2	1	3	13	1	2	1	5	4		24	24000
548	6	PI02	0	T/L37	NBKUR3	NBKUR3-05	Inoculated	1	2016-04-28	12:00:00	2016-05-20	37-6-20/5	Y	1	15	1.41421	14	4	3	2	3	2	16	2	2	2	5	5		30	30000
549	7	PI03	0	T/L37	NBKUR3	NBKUR3-05	Inoculated	1	2016-04-28	12:00:00	2016-05-20	37-7-20/5	Y	1	33	11.3137	25	3	4	7	6	5	41	6	7	9	13	6		66	66000
550	8	PI03	0	T/L37	NBKUR3	NBKUR3-05	Inoculated	1	2016-04-28	12:00:00	2016-05-20	37-8-20/5	Y	1	17	1.41421	18	5	2	2	6	3	16	3	4	3	3	3		34	34000
551	9	PI03	0	T/L37	NBKUR3	NBKUR3-05	Inoculated	1	2016-04-28	12:00:00	2016-05-20	37-9-20/5	Y	1	30	7.07107	35	5	11	6	7	6	25	5	6	4	5	5		60	60000
552	10	PI03	0	T/L37	NBKUR3	NBKUR3-05	Inoculated	1	2016-04-28	12:00:00	2016-05-20	37-10-20/5	Y	1	29	5.65685	33	5	9	6	6	7	25	4	5	6	5	5		58	58000
553	11	PI03	0	T/L37	NBKUR3	NBKUR3-05	Inoculated	1	2016-04-28	12:00:00	2016-05-20	37-11-20/5	Y	1	29	5.65685	33	5	9	6	6	7	25	4	5	6	5	5		58	58000
554	12	PI04	0	T/L37	NBKUR3	NBKUR3-05	Inoculated	1	2016-04-28	12:00:00	2016-05-20	37-12-20/5	Y	1	35.5	7.77817	41	7	8	6	9	11	30	7	6	7	7	3		71	71000
555	13	PI04	0	T/L37	NBKUR3	NBKUR3-05	Inoculated	1	2016-04-28	12:00:00	2016-06-21	37-13-20/6	N	0	0	0	0	0	0	0	0	0	0	0	0	0	0	0		0	0
556	14	PI04	0	T/L37	NBKUR3	NBKUR3-05	Inoculated	1	2016-04-28	12:00:00	2016-05-22	37-14-22/5	Y	1	35.5	12.0208	44	8	11	9	9	7	27	6	9	4	5	3		71	71000
557	15	PI04	0	T/L37	NBKUR3	NBKUR3-05	Inoculated	1	2016-04-28	12:00:00	2016-05-22	37-15-22/5	Y	1	28	4.24264	31	6	6	7	8	4	25	4	5	5	8	3		56	56000
558	16	PI04	0	T/L37	NBKUR3	NBKUR3-05	Inoculated	1	2016-04-28	12:00:00	2016-05-22	37-16-22/5	Y	1	18.5	4.94975	22	2	5	6	6	3	15	3	3	4	4	1		37	37000
559	1	PI01	0	T/L38	NBKUR3	NBKUR3-06	Inoculated	1	2016-04-28	12:00:00	2016-06-22	38-1-20/6	N	0	0	0	0	0	0	0	0	0	0	0	0	0	0	0		0	0
560	2	PI02	0	T/L38	NBKUR3	NBKUR3-06	Inoculated	1	2016-04-28	12:00:00	2016-05-20	38-2-20/5	Y	1	29	5.65685	33	5	9	6	6	7	25	4	5	6	5	5		58	58000
561	3	PI02	0	T/L38	NBKUR3	NBKUR3-06	Inoculated	1	2016-04-28	12:00:00	2016-05-20	38-3-20/5	Y	1	35.5	7.77817	41	7	8	6	9	11	30	7	6	7	7	3		71	71000
562	4	PI02	0	T/L38	NBKUR3	NBKUR3-06	Inoculated	1	2016-04-28	12:00:00	2016-05-20	38-4-20/5	Y	1	35.5	12.0208	44	8	11	9	9	7	27	6	9	4	5	3		71	71000
563	5	PI03	0	T/L38	NBKUR3	NBKUR3-06	Inoculated	1	2016-04-28	12:00:00	2016-05-20	38-5-20/5	Y	1	28	4.24264	31	6	6	7	8	4	25	4	5	5	8	3		56	56000
564	6	PI03	0	T/L38	NBKUR3	NBKUR3-06	Inoculated	1	2016-04-28	12:00:00	2016-05-20	38-6-20/5	Y	1	27.5	0.707107	28	5	6	5	6	6	27	4	6	5	6	6		55	55000
565	7	PI03	0	T/L38	NBKUR3	NBKUR3-06	Inoculated	1	2016-04-28	12:00:00	2016-05-20	38-7-20/5	Y	1	24	1.41421	25	6	5	4	5	5	23	5	5	5	5	3		48	48000
566	8	PI03	0	T/L38	NBKUR3	NBKUR3-06	Inoculated	1	2016-04-28	12:00:00	2016-05-20	38-8-20/5	Y	1	22	1.41421	21	4	5	4	4	4	23	4	3	4	7	5		44	44000
567	9	PI04	0	T/L38	NBKUR3	NBKUR3-06	Inoculated	1	2016-04-28	12:00:00	2016-05-20	38-9-20/5	Y	1	31.5	4.94975	28	4	6	5	4	9	35	6	7	9	9	4		63	63000
568	10	PI04	0	T/L38	NBKUR3	NBKUR3-06	Inoculated	1	2016-04-28	12:00:00	2016-06-22	38-10-20/6	N	0	0	0	0	0	0	0	0	0	0	0	0	0	0	0		0	0
569	11	PI04	0	T/L38	NBKUR3	NBKUR3-06	Inoculated	1	2016-04-28	12:00:00	2016-06-22	38-11-20/6	N	0	0	0	0	0	0	0	0	0	0	0	0	0	0	0		0	0
570	12	PI04	0	T/L38	NBKUR3	NBKUR3-06	Inoculated	1	2016-04-28	12:00:00	2016-05-22	38-12-22/5	Y	1	29.5	3.53553	32	3	5	8	8	8	27	8	5	6	6	2		59	59000
571	13	PI04	0	T/L38	NBKUR3	NBKUR3-06	Inoculated	1	2016-04-28	12:00:00	2016-05-22	38-13-22/5	Y	1	26.5	3.53553	29	5	8	5	6	5	24	6	2	3	9	4		53	53000
572	14	PI05	0	T/L38	NBKUR3	NBKUR3-06	Inoculated	1	2016-04-28	12:00:00	2016-05-22	38-14-22/5	Y	1	25	2.82843	23	4	6	4	6	3	27	5	6	5	4	7		50	50000
573	15	PI06	0	T/L38	NBKUR3	NBKUR3-06	Inoculated	1	2016-04-28	12:00:00	2016-05-22	38-15-22/5	Y	1	23.5	2.12132	25	7	6	4	4	4	22	3	3	6	5	5		47	47000
574	1	PI01	0	T/L39	NBKUR3	NBKUR3-07	Non-inoculated	0	2016-04-28	12:00:00	2016-05-08	39-1-8/5	Y	1	14	7.07107	19	2	5	5	4	3	9	3	2	1	2	1		28	28000
575	2	PI02	0	T/L39	NBKUR3	NBKUR3-07	Non-inoculated	0	2016-04-28	12:00:00	2016-05-08	39-2-8/5	N	0	0	0	0	0	0	0	0	0	0	0	0	0	0	0		0	0
576	3	PI02	0	T/L39	NBKUR3	NBKUR3-07	Non-inoculated	0	2016-04-28	12:00:00	2016-05-08	39-3-8/5	N	0	0	0	0	0	0	0	0	0	0	0	0	0	0	0		0	0
577	4	PI02	0	T/L39	NBKUR3	NBKUR3-07	Non-inoculated	0	2016-04-28	12:00:00	2016-05-08	39-4-8/5	N	0	0	0	0	0	0	0	0	0	0	0	0	0	0	0		0	0
578	5	PI03	0	T/L39	NBKUR3	NBKUR3-07	Non-inoculated	0	2016-04-28	12:00:00	2016-06-22	39-5-20/6	N	0	0	0	0	0	0	0	0	0	0	0	0	0	0	0		0	0
579	6	PI03	0	T/L39	NBKUR3	NBKUR3-07	Non-inoculated	0	2016-04-28	12:00:00	2016-06-22	39-6-20/6	N	0	0	0	0	0	0	0	0	0	0	0	0	0	0	0		0	0
580	7	PI03	0	T/L39	NBKUR3	NBKUR3-07	Non-inoculated	0	2016-04-28	12:00:00	2016-06-21	39-7-20/6	N	0	0	0	0	0	0	0	0	0	0	0	0	0	0	0		0	0
581	8	PI05	0	T/L39	NBKUR3	NBKUR3-07	Non-inoculated	0	2016-04-28	12:00:00	2016-06-21	39-8-20/6	N	0	0	0	0	0	0	0	0	0	0	0	0	0	0	0		0	0
582	9	PI05	0	T/L39	NBKUR3	NBKUR3-07	Non-inoculated	0	2016-04-28	12:00:00	2016-06-21	39-9-20/6	N	0	0	0	0	0	0	0	0	0	0	0	0	0	0	0		0	0
583	10	PI05	0	T/L39	NBKUR3	NBKUR3-07	Non-inoculated	0	2016-04-28	12:00:00	2016-06-22	39-10-20/6	N	0	0	0	0	0	0	0	0	0	0	0	0	0	0	0		0	0
584	11	PI08	0	T/L39	NBKUR3	NBKUR3-07	Non-inoculated	0	2016-04-28	12:00:00	2016-06-21	39-11-20/6	N	0	0	0	0	0	0	0	0	0	0	0	0	0	0	0		0	0
585	12	PI09	0	T/L39	NBKUR3	NBKUR3-07	Non-inoculated	0	2016-04-28	12:00:00	2016-06-21	39-12-20/6	N	0	0	0	0	0	0	0	0	0	0	0	0	0	0	0		0	0
586	13	PI13	0	T/L39	NBKUR3	NBKUR3-07	Non-inoculated	0	2016-04-28	12:00:00	2016-06-21	39-13-20/6	N	0	0	0	0	0	0	0	0	0	0	0	0	0	0	0		0	0
587	14	PI15	0	T/L39	NBKUR3	NBKUR3-07	Non-inoculated	0	2016-04-28	12:00:00	2016-06-21	39-14-20/6	N	0	0	0	0	0	0	0	0	0	0	0	0	0	0	0		0	0
588	15	PI16	0	T/L39	NBKUR3	NBKUR3-07	Non-inoculated	0	2016-04-28	12:00:00	2016-06-22	39-15-20/6	N	0	0	0	0	0	0	0	0	0	0	0	0	0	0	0		0	0
589	1	PI01	0	T/L40	NBKUR3	NBKUR3-08	Inoculated	1	2016-04-28	12:00:00	2016-06-21	40-1-20/6	N	0	0	0	0	0	0	0	0	0	0	0	0	0	0	0		0	0
590	2	PI01	0	T/L40	NBKUR3	NBKUR3-08	Inoculated	1	2016-04-28	12:00:00	2016-06-22	40-2-20/6	N	0	0	0	0	0	0	0	0	0	0	0	0	0	0	0		0	0
591	3	PI02	0	T/L40	NBKUR3	NBKUR3-08	Inoculated	1	2016-04-28	12:00:00	2016-05-20	40-3-20/5	Y	1	35.5	12.0208	44	8	11	9	9	7	27	6	9	4	5	3		71	71000
592	4	PI02	0	T/L40	NBKUR3	NBKUR3-08	Inoculated	1	2016-04-28	12:00:00	2016-05-20	40-4-20/5	Y	1	28	4.24264	31	6	6	7	8	4	25	4	5	5	8	3		56	56000
593	5	PI02	0	T/L40	NBKUR3	NBKUR3-08	Inoculated	1	2016-04-28	12:00:00	2016-05-20	40-5-20/5	Y	1	24	2.82843	26	7	6	5	4	4	22	4	4	3	5	6		48	48000
594	6	PI02	0	T/L40	NBKUR3	NBKUR3-08	Inoculated	1	2016-04-28	12:00:00	2016-05-20	40-6-20/5	Y	1	26.5	7.77817	32	7	7	7	5	6	21	6	6	3	3	3		53	53000
595	7	PI03	0	T/L40	NBKUR3	NBKUR3-08	Inoculated	1	2016-04-28	12:00:00	2016-05-20	40-7-20/5	Y	1	35.5	12.0208	44	8	11	9	9	7	27	6	9	4	5	3		71	71000
596	8	PI03	0	T/L40	NBKUR3	NBKUR3-08	Inoculated	1	2016-04-28	12:00:00	2016-05-20	40-8-20/5	Y	1	29	5.65685	33	5	9	6	6	7	25	4	5	6	5	5		58	58000
597	9	PI03	0	T/L40	NBKUR3	NBKUR3-08	Inoculated	1	2016-04-28	12:00:00	2016-05-20	40-9-20/5	Y	1	27.5	0.707107	28	5	6	5	6	6	27	4	6	5	6	6		55	55000
598	10	PI03	0	T/L40	NBKUR3	NBKUR3-08	Inoculated	1	2016-04-28	12:00:00	2016-05-20	40-10-20/5	Y	1	24	1.41421	25	6	5	4	5	5	23	5	5	5	5	3		48	48000
599	11	PI03	0	T/L40	NBKUR3	NBKUR3-08	Inoculated	1	2016-04-28	12:00:00	2016-05-20	40-11-20/5	Y	1	29	5.65685	33	5	9	6	6	7	25	4	5	6	5	5		58	58000
600	12	PI04	0	T/L40	NBKUR3	NBKUR3-08	Inoculated	1	2016-04-28	12:00:00	2016-05-20	40-12-20/5	Y	1	35.5	7.77817	41	7	8	6	9	11	30	7	6	7	7	3		71	71000
601	13	PI04	0	T/L40	NBKUR3	NBKUR3-08	Inoculated	1	2016-04-28	12:00:00	2016-06-21	40-13-20/6	N	0	0	0	0	0	0	0	0	0	0	0	0	0	0	0		0	0
602	14	PI04	0	T/L40	NBKUR3	NBKUR3-08	Inoculated	1	2016-04-28	12:00:00	2016-05-22	40-14-22/5	Y	1	35.5	12.0208	44	8	11	9	9	7	27	6	9	4	5	3		71	71000
603	15	PI05	0	T/L40	NBKUR3	NBKUR3-08	Inoculated	1	2016-04-28	12:00:00	2016-06-21	40-15-20/6	N	0	0	0	0	0	0	0	0	0	0	0	0	0	0	0		0	0
604	1	PI01	0	T/L41	NBCAV1	NBCAV1-01	Inoculated	1	2016-04-28	14:00:00	2016-06-22	41-1-20/6	N	0	0	0	0	0	0	0	0	0	0	0	0	0	0	0		0	0
605	2	PI01	0	T/L41	NBCAV1	NBCAV1-01	Inoculated	1	2016-04-28	14:00:00	2016-06-21	41-2-20/6	N	0	0	0	0	0	0	0	0	0	0	0	0	0	0	0		0	0
606	3	PI01	0	T/L41	NBCAV1	NBCAV1-01	Inoculated	1	2016-04-28	14:00:00	2016-06-21	41-3-20/6	N	0	0	0	0	0	0	0	0	0	0	0	0	0	0	0		0	0
607	4	PI02	0	T/L41	NBCAV1	NBCAV1-01	Inoculated	1	2016-04-28	14:00:00	2016-05-20	41-4-20/5	Y	1	28	4.24264	31	6	6	7	8	4	25	4	5	5	8	3		56	56000
608	5	PI02	0	T/L41	NBCAV1	NBCAV1-01	Inoculated	1	2016-04-28	14:00:00	2016-05-20	41-5-20/5	Y	1	35.5	12.0208	44	8	11	9	9	7	27	6	9	4	5	3		71	71000
609	6	PI03	0	T/L41	NBCAV1	NBCAV1-01	Inoculated	1	2016-04-28	14:00:00	2016-05-20	41-6-20/5	Y	1	24	1.41421	25	6	5	4	5	5	23	5	5	5	5	3		48	48000
610	7	PI03	0	T/L41	NBCAV1	NBCAV1-01	Inoculated	1	2016-04-28	14:00:00	2016-05-20	41-7-20/5	Y	1	29	5.65685	33	5	9	6	6	7	25	4	5	6	5	5		58	58000
611	8	PI03	0	T/L41	NBCAV1	NBCAV1-01	Inoculated	1	2016-04-28	14:00:00	2016-05-20	41-8-20/5	Y	1	31.5	4.94975	28	4	6	5	4	9	35	6	7	9	9	4		63	63000
612	9	PI03	0	T/L41	NBCAV1	NBCAV1-01	Inoculated	1	2016-04-28	14:00:00	2016-05-20	41-9-20/5	Y	1	29.5	3.53553	32	3	5	8	8	8	27	8	5	6	6	2		59	59000
613	10	PI04	0	T/L41	NBCAV1	NBCAV1-01	Inoculated	1	2016-04-28	14:00:00	2016-06-22	41-10-20/6	N	0	0	0	0	0	0	0	0	0	0	0	0	0	0	0		0	0
614	11	PI04	0	T/L41	NBCAV1	NBCAV1-01	Inoculated	1	2016-04-28	14:00:00	2016-05-22	41-11-22/5	Y	1	25.5	6.36396	30	6	5	7	6	6	21	6	6	4	1	4		51	51000
615	12	PI04	0	T/L41	NBCAV1	NBCAV1-01	Inoculated	1	2016-04-28	14:00:00	2016-06-21	41-12-20/6	N	0	0	0	0	0	0	0	0	0	0	0	0	0	0	0		0	0
616	13	PI04	0	T/L41	NBCAV1	NBCAV1-01	Inoculated	1	2016-04-28	14:00:00	2016-05-22	41-13-22/5	Y	1	29	5.65685	33	5	9	6	6	7	25	4	5	6	5	5		58	58000
617	14	PI04	0	T/L41	NBCAV1	NBCAV1-01	Inoculated	1	2016-04-28	14:00:00	2016-05-22	41-14-22/5	Y	1	27.5	0.707107	28	5	6	5	6	6	27	4	6	5	6	6		55	55000
618	15	PI05	0	T/L41	NBCAV1	NBCAV1-01	Inoculated	1	2016-04-28	14:00:00	2016-05-22	41-15-22/5	Y	1	24	1.41421	25	6	5	4	5	5	23	5	5	5	5	3		48	48000
619	1	PI01	0	T/L42	NBCAV1	NBCAV1-02	Inoculated	1	2016-04-28	14:00:00	2016-06-24	42-1-20/6	N	0	0	0	0	0	0	0	0	0	0	0	0	0	0	0		0	0
620	2	PI01	0	T/L42	NBCAV1	NBCAV1-02	Inoculated	1	2016-04-28	14:00:00	2016-06-21	42-2-20/6	N	0	0	0	0	0	0	0	0	0	0	0	0	0	0	0		0	0
621	3	PI01	0	T/L42	NBCAV1	NBCAV1-02	Inoculated	1	2016-04-28	14:00:00	2016-06-24	42-3-20/6	N	0	0	0	0	0	0	0	0	0	0	0	0	0	0	0		0	0
622	4	PI01	0	T/L42	NBCAV1	NBCAV1-02	Inoculated	1	2016-04-28	14:00:00	2016-06-22	42-4-20/6	N	0	0	0	0	0	0	0	0	0	0	0	0	0	0	0		0	0
623	5	PI02	0	T/L42	NBCAV1	NBCAV1-02	Inoculated	1	2016-04-28	14:00:00	2016-05-20	42-5-20/5	Y	1	29	5.65685	33	5	9	6	6	7	25	4	5	6	5	5		58	58000
624	6	PI03	0	T/L42	NBCAV1	NBCAV1-02	Inoculated	1	2016-04-28	14:00:00	2016-05-20	42-6-20/5	Y	1	35.5	7.77817	41	7	8	6	9	11	30	7	6	7	7	3		71	71000
625	7	PI03	0	T/L42	NBCAV1	NBCAV1-02	Inoculated	1	2016-04-28	14:00:00	2016-05-20	42-7-20/5	Y	1	35.5	12.0208	44	8	11	9	9	7	27	6	9	4	5	3		71	71000
626	8	PI03	0	T/L42	NBCAV1	NBCAV1-02	Inoculated	1	2016-04-28	14:00:00	2016-05-20	42-8-20/5	Y	1	28	4.24264	31	6	6	7	8	4	25	4	5	5	8	3		56	56000
627	9	PI03	0	T/L42	NBCAV1	NBCAV1-02	Inoculated	1	2016-04-28	14:00:00	2016-05-22	42-9-22/5	Y	1	27.5	0.707107	28	5	6	5	6	6	27	4	6	5	6	6		55	55000
628	10	PI04	0	T/L42	NBCAV1	NBCAV1-02	Inoculated	1	2016-04-28	14:00:00	2016-06-21	42-10-20/6	N	0	0	0	0	0	0	0	0	0	0	0	0	0	0	0		0	0
629	11	PI04	0	T/L42	NBCAV1	NBCAV1-02	Inoculated	1	2016-04-28	14:00:00	2016-05-22	42-11-22/5	Y	1	24	1.41421	25	6	5	4	5	5	23	5	5	5	5	3		48	48000
630	12	PI04	0	T/L42	NBCAV1	NBCAV1-02	Inoculated	1	2016-04-28	14:00:00	2016-05-22	42-12-22/5	Y	1	35.5	12.0208	44	8	11	9	9	7	27	6	9	4	5	3		71	71000
631	13	PI04	0	T/L42	NBCAV1	NBCAV1-02	Inoculated	1	2016-04-28	14:00:00	2016-05-22	42-13-22/5	Y	1	28	4.24264	31	6	6	7	8	4	25	4	5	5	8	3		56	56000
632	14	PI05	0	T/L42	NBCAV1	NBCAV1-02	Inoculated	1	2016-04-28	14:00:00	2016-05-22	42-14-22/5	Y	1	26	1.41421	27	3	7	7	3	7	25	6	5	5	4	5		52	52000
633	15	PI0	1	T/L42	NBCAV1	NBCAV1-02	Inoculated	1	2016-04-28	14:00:00					0	0	0	0	0	0	0	0	0	0	0	0	0	0		0	0
634	1	PI01	0	T/L43	NBCAV1	NBCAV1-03	Non-inoculated	0	2016-04-28	14:00:00	2016-06-21	43-1-20/6	N	0	0	0	0	0	0	0	0	0	0	0	0	0	0	0		0	0
635	2	PI02	0	T/L43	NBCAV1	NBCAV1-03	Non-inoculated	0	2016-04-28	14:00:00	2016-05-20	43-2-20/5	Y	1	5.5	0.707107	5	1	1	0	0	3	6	1	3	1	0	1		11	11000
636	3	PI02	0	T/L43	NBCAV1	NBCAV1-03	Non-inoculated	0	2016-04-28	14:00:00	2016-06-21	43-3-20/6	N	0	0	0	0	0	0	0	0	0	0	0	0	0	0	0		0	0
637	4	PI02	0	T/L43	NBCAV1	NBCAV1-03	Non-inoculated	0	2016-04-28	14:00:00	2016-06-21	43-4-20/6	N	0	0	0	0	0	0	0	0	0	0	0	0	0	0	0		0	0
638	5	PI02	0	T/L43	NBCAV1	NBCAV1-03	Non-inoculated	0	2016-04-28	14:00:00	2016-06-22	43-5-20/6	N	0	0	0	0	0	0	0	0	0	0	0	0	0	0	0		0	0
639	6	PI03	0	T/L43	NBCAV1	NBCAV1-03	Non-inoculated	0	2016-04-28	14:00:00	2016-06-24	43-6-20/6	N	0	0	0	0	0	0	0	0	0	0	0	0	0	0	0		0	0
640	7	PI03	0	T/L43	NBCAV1	NBCAV1-03	Non-inoculated	0	2016-04-28	14:00:00	2016-06-21	43-7-20/6	N	0	0	0	0	0	0	0	0	0	0	0	0	0	0	0		0	0
641	8	PI03	0	T/L43	NBCAV1	NBCAV1-03	Non-inoculated	0	2016-04-28	14:00:00	2016-06-21	43-8-20/6	N	0	0	0	0	0	0	0	0	0	0	0	0	0	0	0		0	0
642	9	PI03	0	T/L43	NBCAV1	NBCAV1-03	Non-inoculated	0	2016-04-28	14:00:00	2016-06-21	43-9-20/6	N	0	0	0	0	0	0	0	0	0	0	0	0	0	0	0		0	0
643	10	PI03	0	T/L43	NBCAV1	NBCAV1-03	Non-inoculated	0	2016-04-28	14:00:00	2016-06-21	43-10-20/6	N	0	0	0	0	0	0	0	0	0	0	0	0	0	0	0		0	0
644	11	PI04	0	T/L43	NBCAV1	NBCAV1-03	Non-inoculated	0	2016-04-28	14:00:00	2016-06-21	43-11-20/6	N	0	0	0	0	0	0	0	0	0	0	0	0	0	0	0		0	0
645	12	PI04	0	T/L43	NBCAV1	NBCAV1-03	Non-inoculated	0	2016-04-28	14:00:00	2016-06-21	43-12-20/6	N	0	0	0	0	0	0	0	0	0	0	0	0	0	0	0		0	0
646	13	PI04	0	T/L43	NBCAV1	NBCAV1-03	Non-inoculated	0	2016-04-28	14:00:00	2016-06-21	43-13-20/6	Y	1	2.5	0.707107	2	1	0	1	0	0	3	0	2	1	0	0		5	5000
647	14	PI04	0	T/L43	NBCAV1	NBCAV1-03	Non-inoculated	0	2016-04-28	14:00:00	2016-06-22	43-14-20/6	N	0	0	0	0	0	0	0	0	0	0	0	0	0	0	0		0	0
648	15	PI08	0	T/L43	NBCAV1	NBCAV1-03	Non-inoculated	0	2016-04-28	14:00:00	2016-06-21	43-15-20/6	N	0	0	0	0	0	0	0	0	0	0	0	0	0	0	0		0	0
649	1	PI01	0	T/L44	NBCAV1	NBCAV1-04	Inoculated	1	2016-04-28	14:00:00	2016-06-21	44-1-20/6	N	0	0	0	0	0	0	0	0	0	0	0	0	0	0	0		0	0
650	2	PI01	0	T/L44	NBCAV1	NBCAV1-04	Inoculated	1	2016-04-28	14:00:00	2016-06-21	44-2-20/6	N	0	0	0	0	0	0	0	0	0	0	0	0	0	0	0		0	0
651	3	PI01	0	T/L44	NBCAV1	NBCAV1-04	Inoculated	1	2016-04-28	14:00:00	2016-06-21	44-3-20/6	N	0	0	0	0	0	0	0	0	0	0	0	0	0	0	0		0	0
652	4	PI02	0	T/L44	NBCAV1	NBCAV1-04	Inoculated	1	2016-04-28	14:00:00	2016-05-20	44-4-20/5	Y	1	22	1.41421	21	4	5	4	4	4	23	4	3	4	7	5		44	44000
653	5	PI02	0	T/L44	NBCAV1	NBCAV1-04	Inoculated	1	2016-04-28	14:00:00	2016-05-20	44-5-20/5	Y	1	31.5	4.94975	28	4	6	5	4	9	35	6	7	9	9	4		63	63000
654	6	PI02	0	T/L44	NBCAV1	NBCAV1-04	Inoculated	1	2016-04-28	14:00:00	2016-05-20	44-6-20/5	Y	1	29.5	3.53553	32	3	5	8	8	8	27	8	5	6	6	2		59	59000
655	7	PI03	0	T/L44	NBCAV1	NBCAV1-04	Inoculated	1	2016-04-28	14:00:00	2016-05-20	44-7-20/5	Y	1	26.5	3.53553	29	5	8	5	6	5	24	6	2	3	9	4		53	53000
656	8	PI03	0	T/L44	NBCAV1	NBCAV1-04	Inoculated	1	2016-04-28	14:00:00	2016-05-20	44-8-20/5	Y	1	25	2.82843	23	4	6	4	6	3	27	5	6	5	4	7		50	50000
657	9	PI03	0	T/L44	NBCAV1	NBCAV1-04	Inoculated	1	2016-04-28	14:00:00	2016-05-20	44-9-20/5	Y	1	35.5	12.0208	44	8	11	9	9	7	27	6	9	4	5	3		71	71000
658	10	PI04	0	T/L44	NBCAV1	NBCAV1-04	Inoculated	1	2016-04-28	14:00:00	2016-05-20	44-10-20/5	Y	1	28	4.24264	31	6	6	7	8	4	25	4	5	5	8	3		56	56000
659	11	PI04	0	T/L44	NBCAV1	NBCAV1-04	Inoculated	1	2016-04-28	14:00:00	2016-05-20	44-11-20/5	Y	1	31.5	4.94975	28	4	6	5	4	9	35	6	7	9	9	4		63	63000
660	12	PI04	0	T/L44	NBCAV1	NBCAV1-04	Inoculated	1	2016-04-28	14:00:00	2016-06-28	44-12-28/6	N	0	0	0	0	0	0	0	0	0	0	0	0	0	0	0		0	0
661	13	PI04	0	T/L44	NBCAV1	NBCAV1-04	Inoculated	1	2016-04-28	14:00:00	2016-05-22	44-13-22/5	Y	1	29.5	3.53553	32	3	5	8	8	8	27	8	5	6	6	2		59	59000
662	14	PI05	0	T/L44	NBCAV1	NBCAV1-04	Inoculated	1	2016-04-28	14:00:00	2016-06-28	44-14-28/6	N	0	0	0	0	0	0	0	0	0	0	0	0	0	0	0		0	0
663	15	PI05	0	T/L44	NBCAV1	NBCAV1-04	Inoculated	1	2016-04-28	14:00:00	2016-06-28	44-15-28/6	N	0	0	0	0	0	0	0	0	0	0	0	0	0	0	0		0	0
664	1	PI01	0	T/L45	NBCAV1	NBCAV1-05	Non-inoculated	0	2016-04-28	14:00:00	2016-05-05	45-1-5/5	N	0	0	0	0	0	0	0	0	0	0	0	0	0	0	0		0	0
665	2	PI02	0	T/L45	NBCAV1	NBCAV1-05	Non-inoculated	0	2016-04-28	14:00:00	2016-05-05	45-2-5/5	N	0	0	0	0	0	0	0	0	0	0	0	0	0	0	0		0	0
666	3	PI02	0	T/L45	NBCAV1	NBCAV1-05	Non-inoculated	0	2016-04-28	14:00:00	2016-06-28	45-3-28/6	N	0	0	0	0	0	0	0	0	0	0	0	0	0	0	0		0	0
667	4	PI02	0	T/L45	NBCAV1	NBCAV1-05	Non-inoculated	0	2016-04-28	14:00:00	2016-06-28	45-4-28/6	N	0	0	0	0	0	0	0	0	0	0	0	0	0	0	0		0	0
668	5	PI03	0	T/L45	NBCAV1	NBCAV1-05	Non-inoculated	0	2016-04-28	14:00:00	2016-06-28	45-5-28/6	N	0	0	0	0	0	0	0	0	0	0	0	0	0	0	0		0	0
669	6	PI03	0	T/L45	NBCAV1	NBCAV1-05	Non-inoculated	0	2016-04-28	14:00:00	2016-06-28	45-6-28/6	N	0	0	0	0	0	0	0	0	0	0	0	0	0	0	0		0	0
670	7	PI03	0	T/L45	NBCAV1	NBCAV1-05	Non-inoculated	0	2016-04-28	14:00:00	2016-06-28	45-7-28/6	N	0	0	0	0	0	0	0	0	0	0	0	0	0	0	0		0	0
671	8	PI03	0	T/L45	NBCAV1	NBCAV1-05	Non-inoculated	0	2016-04-28	14:00:00	2016-06-28	45-8-28/6	N	0	0	0	0	0	0	0	0	0	0	0	0	0	0	0		0	0
672	9	PI03	0	T/L45	NBCAV1	NBCAV1-05	Non-inoculated	0	2016-04-28	14:00:00	2016-06-28	45-9-28/6	N	0	0	0	0	0	0	0	0	0	0	0	0	0	0	0		0	0
673	10	PI04	0	T/L45	NBCAV1	NBCAV1-05	Non-inoculated	0	2016-04-28	14:00:00	2016-06-28	45-10-28/6	N	0	0	0	0	0	0	0	0	0	0	0	0	0	0	0		0	0
674	11	PI05	0	T/L45	NBCAV1	NBCAV1-05	Non-inoculated	0	2016-04-28	14:00:00	2016-06-28	45-11-28/6	N	0	0	0	0	0	0	0	0	0	0	0	0	0	0	0		0	0
675	12	PI08	0	T/L45	NBCAV1	NBCAV1-05	Non-inoculated	0	2016-04-28	14:00:00	2016-06-28	45-12-28/6	N	0	0	0	0	0	0	0	0	0	0	0	0	0	0	0		0	0
676	13	PI09	0	T/L45	NBCAV1	NBCAV1-05	Non-inoculated	0	2016-04-28	14:00:00	2016-06-28	45-13-28/6	N	0	0	0	0	0	0	0	0	0	0	0	0	0	0	0		0	0
677	14	PI11	0	T/L45	NBCAV1	NBCAV1-05	Non-inoculated	0	2016-04-28	14:00:00	2016-06-28	45-14-28/6	N	0	0	0	0	0	0	0	0	0	0	0	0	0	0	0		0	0
678	15	PI15	0	T/L45	NBCAV1	NBCAV1-05	Non-inoculated	0	2016-04-28	14:00:00	2016-06-28	45-15-28/6	N	0	0	0	0	0	0	0	0	0	0	0	0	0	0	0		0	0
679	1	PI01	0	T/L46	NBCAV1	NBCAV1-06	Inoculated	1	2016-04-28	14:00:00	2016-06-28	46-1-28/6	N	0	0	0	0	0	0	0	0	0	0	0	0	0	0	0		0	0
680	2	PI01	0	T/L46	NBCAV1	NBCAV1-06	Inoculated	1	2016-04-28	14:00:00	2016-06-28	46-2-28/6	N	0	0	0	0	0	0	0	0	0	0	0	0	0	0	0		0	0
681	3	PI02	0	T/L46	NBCAV1	NBCAV1-06	Inoculated	1	2016-04-28	14:00:00	2016-05-20	46-3-20/5	Y	1	29	5.65685	33	5	9	6	6	7	25	4	5	6	5	5		58	58000
682	4	PI02	0	T/L46	NBCAV1	NBCAV1-06	Inoculated	1	2016-04-28	14:00:00	2016-05-20	46-4-20/5	Y	1	35.5	7.77817	41	7	8	6	9	11	30	7	6	7	7	3		71	71000
683	5	PI02	0	T/L46	NBCAV1	NBCAV1-06	Inoculated	1	2016-04-28	14:00:00	2016-05-20	46-5-20/5	Y	1	35.5	12.0208	44	8	11	9	9	7	27	6	9	4	5	3		71	71000
684	6	PI02	0	T/L46	NBCAV1	NBCAV1-06	Inoculated	1	2016-04-28	14:00:00	2016-05-20	46-6-20/5	Y	1	28	4.24264	31	6	6	7	8	4	25	4	5	5	8	3		56	56000
685	7	PI02	0	T/L46	NBCAV1	NBCAV1-06	Inoculated	1	2016-04-28	14:00:00	2016-05-20	46-7-20/5	Y	1	27.5	0.707107	28	5	6	5	6	6	27	4	6	5	6	6		55	55000
686	8	PI03	0	T/L46	NBCAV1	NBCAV1-06	Inoculated	1	2016-04-28	14:00:00	2016-05-20	46-8-20/5	Y	1	24	1.41421	25	6	5	4	5	5	23	5	5	5	5	3		48	48000
687	9	PI03	0	T/L46	NBCAV1	NBCAV1-06	Inoculated	1	2016-04-28	14:00:00	2016-05-20	46-9-20/5	Y	1	22	1.41421	21	4	5	4	4	4	23	4	3	4	7	5		44	44000
688	10	PI03	0	T/L46	NBCAV1	NBCAV1-06	Inoculated	1	2016-04-28	14:00:00	2016-05-20	46-10-20/5	Y	1	31.5	4.94975	28	4	6	5	4	9	35	6	7	9	9	4		63	63000
689	11	PI03	0	T/L46	NBCAV1	NBCAV1-06	Inoculated	1	2016-04-28	14:00:00	2016-05-20	46-11-20/5	Y	1	29.5	3.53553	32	3	5	8	8	8	27	8	5	6	6	2		59	59000
690	12	PI03	0	T/L46	NBCAV1	NBCAV1-06	Inoculated	1	2016-04-28	14:00:00	2016-05-20	46-12-20/5	Y	1	26.5	3.53553	29	5	8	5	6	5	24	6	2	3	9	4		53	53000
691	13	PI04	0	T/L46	NBCAV1	NBCAV1-06	Inoculated	1	2016-04-28	14:00:00	2016-05-20	46-13-20/5	Y	1	25	2.82843	23	4	6	4	6	3	27	5	6	5	4	7		50	50000
692	14	PI05	0	T/L46	NBCAV1	NBCAV1-06	Inoculated	1	2016-04-28	14:00:00	2016-06-27	46-14-24/6	N	0	0	0	0	0	0	0	0	0	0	0	0	0	0	0		0	0
693	15	PI07	0	T/L46	NBCAV1	NBCAV1-06	Inoculated	1	2016-04-28	14:00:00	2016-06-27	46-15-24/6	N	0	0	0	0	0	0	0	0	0	0	0	0	0	0	0		0	0
694	1	PI01	0	T/L47	NBCAV1	NBCAV1-07	Non-inoculated	0	2016-04-28	14:00:00	2016-06-27	47-1-24/6	N	0	0	0	0	0	0	0	0	0	0	0	0	0	0	0		0	0
695	2	PI01	0	T/L47	NBCAV1	NBCAV1-07	Non-inoculated	0	2016-04-28	14:00:00	2016-06-27	47-2-24/6	N	0	0	0	0	0	0	0	0	0	0	0	0	0	0	0		0	0
696	3	PI02	0	T/L47	NBCAV1	NBCAV1-07	Non-inoculated	0	2016-04-28	14:00:00	2016-06-27	47-3-24/6	N	0	0	0	0	0	0	0	0	0	0	0	0	0	0	0		0	0
697	4	PI02	0	T/L47	NBCAV1	NBCAV1-07	Non-inoculated	0	2016-04-28	14:00:00	2016-06-27	47-4-24/6	N	0	0	0	0	0	0	0	0	0	0	0	0	0	0	0		0	0
698	5	PI02	0	T/L47	NBCAV1	NBCAV1-07	Non-inoculated	0	2016-04-28	14:00:00	2016-06-27	47-5-24/6	N	0	0	0	0	0	0	0	0	0	0	0	0	0	0	0		0	0
699	6	PI02	0	T/L47	NBCAV1	NBCAV1-07	Non-inoculated	0	2016-04-28	14:00:00	2016-06-27	47-6-24/6	N	0	0	0	0	0	0	0	0	0	0	0	0	0	0	0		0	0
700	7	PI02	0	T/L47	NBCAV1	NBCAV1-07	Non-inoculated	0	2016-04-28	14:00:00	2016-06-27	47-7-24/6	N	0	0	0	0	0	0	0	0	0	0	0	0	0	0	0		0	0
701	8	PI03	0	T/L47	NBCAV1	NBCAV1-07	Non-inoculated	0	2016-04-28	14:00:00	2016-06-27	47-8-24/6	N	0	0	0	0	0	0	0	0	0	0	0	0	0	0	0		0	0
702	9	PI03	0	T/L47	NBCAV1	NBCAV1-07	Non-inoculated	0	2016-04-28	14:00:00	2016-06-27	47-9-24/6	N	0	0	0	0	0	0	0	0	0	0	0	0	0	0	0		0	0
703	10	PI03	0	T/L47	NBCAV1	NBCAV1-07	Non-inoculated	0	2016-04-28	14:00:00	2016-06-27	47-10-24/6	N	0	0	0	0	0	0	0	0	0	0	0	0	0	0	0		0	0
704	11	PI03	0	T/L47	NBCAV1	NBCAV1-07	Non-inoculated	0	2016-04-28	14:00:00	2016-06-27	47-11-24/6	N	0	0	0	0	0	0	0	0	0	0	0	0	0	0	0		0	0
705	12	PI04	0	T/L47	NBCAV1	NBCAV1-07	Non-inoculated	0	2016-04-28	14:00:00	2016-06-28	47-12-28/6	N	0	0	0	0	0	0	0	0	0	0	0	0	0	0	0		0	0
706	13	PI04	0	T/L47	NBCAV1	NBCAV1-07	Non-inoculated	0	2016-04-28	14:00:00	2016-06-27	47-13-24/6	N	0	0	0	0	0	0	0	0	0	0	0	0	0	0	0		0	0
707	14	PI05	0	T/L47	NBCAV1	NBCAV1-07	Non-inoculated	0	2016-04-28	14:00:00	2016-06-27	47-14-24/6	N	0	0	0	0	0	0	0	0	0	0	0	0	0	0	0		0	0
708	15	PI05	0	T/L47	NBCAV1	NBCAV1-07	Non-inoculated	0	2016-04-28	14:00:00	2016-06-27	47-15-24/6	N	0	0	0	0	0	0	0	0	0	0	0	0	0	0	0		0	0
709	1	PI01	0	T/L48	NBCAV1	NBCAV1-08	Non-inoculated	0	2016-04-28	14:00:00	2016-05-18	48-1-18/5	N	0	0	0	0	0	0	0	0	0	0	0	0	0	0	0		0	0
710	2	PI02	0	T/L48	NBCAV1	NBCAV1-08	Non-inoculated	0	2016-04-28	14:00:00	2016-05-18	48-2-18/5	N	0	0	0	0	0	0	0	0	0	0	0	0	0	0	0		0	0
711	3	PI02	0	T/L48	NBCAV1	NBCAV1-08	Non-inoculated	0	2016-04-28	14:00:00	2016-05-18	48-3-18/5	N	0	0	0	0	0	0	0	0	0	0	0	0	0	0	0		0	0
712	4	PI02	0	T/L48	NBCAV1	NBCAV1-08	Non-inoculated	0	2016-04-28	14:00:00	2016-05-18	48-4-18/5	N	0	0	0	0	0	0	0	0	0	0	0	0	0	0	0		0	0
713	5	PI03	0	T/L48	NBCAV1	NBCAV1-08	Non-inoculated	0	2016-04-28	14:00:00	2016-05-18	48-5-18/5	N	0	0	0	0	0	0	0	0	0	0	0	0	0	0	0		0	0
714	6	PI03	0	T/L48	NBCAV1	NBCAV1-08	Non-inoculated	0	2016-04-28	14:00:00	2016-05-18	48-6-18/5	N	0	0	0	0	0	0	0	0	0	0	0	0	0	0	0		0	0
715	7	PI03	0	T/L48	NBCAV1	NBCAV1-08	Non-inoculated	0	2016-04-28	14:00:00	2016-05-18	48-7-18/5	N	0	0	0	0	0	0	0	0	0	0	0	0	0	0	0		0	0
716	8	PI04	0	T/L48	NBCAV1	NBCAV1-08	Non-inoculated	0	2016-04-28	14:00:00	2016-05-18	48-8-18/5	N	0	0	0	0	0	0	0	0	0	0	0	0	0	0	0		0	0
717	9	PI05	0	T/L48	NBCAV1	NBCAV1-08	Non-inoculated	0	2016-04-28	14:00:00	2016-05-18	48-9-18/5	N	0	0	0	0	0	0	0	0	0	0	0	0	0	0	0		0	0
718	10	PI08	0	T/L48	NBCAV1	NBCAV1-08	Non-inoculated	0	2016-04-28	14:00:00	2016-06-27	48-10-24/6	N	0	0	0	0	0	0	0	0	0	0	0	0	0	0	0		0	0
719	11	PI09	0	T/L48	NBCAV1	NBCAV1-08	Non-inoculated	0	2016-04-28	14:00:00	2016-06-27	48-11-24/6	N	0	0	0	0	0	0	0	0	0	0	0	0	0	0	0		0	0
720	12	PI11	0	T/L48	NBCAV1	NBCAV1-08	Non-inoculated	0	2016-04-28	14:00:00	2016-06-28	48-12-28/6	N	0	0	0	0	0	0	0	0	0	0	0	0	0	0	0		0	0
721	13	PI13	0	T/L48	NBCAV1	NBCAV1-08	Non-inoculated	0	2016-04-28	14:00:00	2016-06-27	48-13-24/6	N	0	0	0	0	0	0	0	0	0	0	0	0	0	0	0		0	0
722	14	PI15	0	T/L48	NBCAV1	NBCAV1-08	Non-inoculated	0	2016-04-28	14:00:00	2016-06-27	48-14-24/6	N	0	0	0	0	0	0	0	0	0	0	0	0	0	0	0		0	0
723	15	PI0	1	T/L48	NBCAV1	NBCAV1-08	Non-inoculated	0	2016-04-28	14:00:00					0	0	0	0	0	0	0	0	0	0	0	0	0	0		0	0

## Sheet: Survey spore counts
Unique ID	Collection Date	Date Spores Counted	number bees in sample	Microtube lable	Hive Number	ceranae_present	mean	SDrep1	sum1rep1	count11	count12	count13	count14	count15	sum2rep1	count21	count22	count23	count24	count25	C1_tot	C2_tot	tot	tot inc x10000
1	2016-04-06	2016-04-10	15	G-JCU4-4	NBJCU4	N	0	0	0	0	0	0	0	0	0	0	0	0	0	0	0	0	0	0
2	2016-04-09	2016-04-10	15	G-KUR3-4	NBKUR3	Y	15	2.82843	17	3	4	4	3	3	13	3	2	3	3	2	17	13	30	300000
3	2016-04-05	2016-04-10	15	G-SPE3-4	NBSPE3	Y	19.5	2.12132	18	3	3	6	2	4	21	4	2	5	6	4	18	21	39	390000
4	2016-04-09	2016-04-10	15	G-KUR4-4	NBKUR4	Y	5.5	0.707107	6	1	0	0	2	3	5	1	0	1	0	3	6	5	11	110000
5	2016-04-12	2016-04-17	15	G-KOA1-4	NBKOA1	N	0	0	0	0	0	0	0	0	0	0	0	0	0	0	0	0	0	0
6	2016-04-12	2016-04-17	15	G-KUR2-4	NBKUR2	Y	20.5	3.53553	18	4	3	4	5	2	23	2	5	5	5	6	18	23	41	410000
7	2016-04-18	2016-04-19	15	G-KUR5-4	NBKUR5	Y	3	1.41421	4	0	0	3	1	0	2	0	0	0	1	1	4	2	6	60000
8	2016-05-01	2016-05-01	15	G-KUR3-5	NBKUR3	Y	12.5	0.707107	12	3	2	2	3	2	13	2	3	2	3	3	12	13	25	250000
9	2016-05-06	2016-05-13	15	G-KUR5-5	NBKUR5	N	0	0	0	0	0	0	0	0	0	0	0	0	0	0	0	0	0	0
10	2016-05-05	2016-05-13	15	G-SPE3-5	NBSPE1	N	0	0	0	0	0	0	0	0	0	0	0	0	0	0	0	0	0	0
11	2016-05-04	2016-05-13	15	G-KUR6-5	NBKUR6	N	0	0	0	0	0	0	0	0	0	0	0	0	0	0	0	0	0	0
12	2016-05-04	2016-05-13	15	G-KUR2-5	NBKUR2	Y	5	0	5	1	2	1	1	0	5	1	2	1	0	1	5	5	10	100000
13	2016-05-13	2016-05-15	15	G-KUR4-5	NBKUR4	Y	7.5	0.707107	8	1	2	2	2	1	7	1	2	1	2	1	8	7	15	150000
14	2016-05-13	2016-05-15	15	G-KUR3-5	NBKUR3	Y	1	1.41421	0	0	0	0	0	0	2	0	1	1	0	0	0	2	2	20000
15	2016-05-16	2016-05-24	15	G-SPE3-5	NBSPE3	Y	1	1.41421	0	0	0	0	0	0	2	1	0	0	1	0	0	2	2	20000
16	2016-05-16	2016-07-20	1	1-5-JCU4	NBJCU4	Y	17	0	17	3	3	4	3	4	17	2	3	3	4	5	17	17	34	68000	individual bee =	2000
17	2016-05-16	2016-07-20	1	2-5-JCU4	NBJCU4	N	0	0	0	0	0	0	0	0	0	0	0	0	0	0	0	0	0	0
18	2016-05-16	2016-07-20	1	3-5-JCU4	NBJCU4	N	0	0	0	0	0	0	0	0	0	0	0	0	0	0	0	0	0	0
19	2016-05-16	2016-07-20	1	4-5-JCU4	NBJCU4	N	0	0	0	0	0	0	0	0	0	0	0	0	0	0	0	0	0	0
20	2016-05-16	2016-07-20	1	5-5-JCU4	NBJCU4	N	0	0	0	0	0	0	0	0	0	0	0	0	0	0	0	0	0	0
21	2016-05-16	2016-07-20	1	6-5-JCU4	NBJCU4	N	0	0	0	0	0	0	0	0	0	0	0	0	0	0	0	0	0	0
22	2016-05-16	2016-07-20	1	7-5-JCU4	NBJCU4	N	0	0	0	0	0	0	0	0	0	0	0	0	0	0	0	0	0	0
23	2016-05-16	2016-07-20	1	8-5-JCU4	NBJCU4	Y	14.5	0	16	3	4	3	3	3	13	3	3	2	2	3	16	13	29	58000
24	2016-05-16	2016-07-20	1	9-5-JCU4	NBJCU4	N	0	0	0	0	0	0	0	0	0	0	0	0	0	0	0	0	0	0
25	2016-05-16	2016-07-20	1	10-5-JCU4	NBJCU4	Y	16	0	15	3	4	3	3	2	17	3	3	3	3	5	15	17	32	64000
26	2016-05-16	2016-07-20	1	11-5-JCU4	NBJCU4	N	0	0	0	0	0	0	0	0	0	0	0	0	0	0	0	0	0	0
27	2016-05-16	2016-07-20	1	12-5-JCU4	NBJCU4	N	0	0	0	0	0	0	0	0	0	0	0	0	0	0	0	0	0	0
28	2016-05-16	2016-07-20	1	13-5-JCU4	NBJCU4	N	0	0	0	0	0	0	0	0	0	0	0	0	0	0	0	0	0	0
29	2016-05-16	2016-07-20	1	14-5-JCU4	NBJCU4	N	0	0	0	0	0	0	0	0	0	0	0	0	0	0	0	0	0	0
30	2016-05-16	2016-07-20	1	15-5-JCU4	NBJCU4	Y	12.5	0	12	3	2	2	2	3	13	3	2	3	3	2	12	13	25	50000
31	2016-05-16	2016-07-20	1	1-5-KOA1	NBKOA1	N	0	0	0	0	0	0	0	0	0	0	0	0	0	0	0	0	0	0
32	2016-05-16	2016-07-20	1	2-5-KOA1	NBKOA1	N	0	0	0	0	0	0	0	0	0	0	0	0	0	0	0	0	0	0
33	2016-05-16	2016-07-20	1	3-5-KOA1	NBKOA1	N	0	0	0	0	0	0	0	0	0	0	0	0	0	0	0	0	0	0
34	2016-05-16	2016-07-20	1	4-5-KOA1	NBKOA1	N	0	0	0	0	0	0	0	0	0	0	0	0	0	0	0	0	0	0
35	2016-05-16	2016-07-20	1	5-5-KOA1	NBKOA1	N	0	0	0	0	0	0	0	0	0	0	0	0	0	0	0	0	0	0
36	2016-05-16	2016-07-20	1	6-5-KOA1	NBKOA1	N	0	0	0	0	0	0	0	0	0	0	0	0	0	0	0	0	0	0
37	2016-05-16	2016-07-20	1	7-5-KOA1	NBKOA1	N	0	0	0	0	0	0	0	0	0	0	0	0	0	0	0	0	0	0
38	2016-05-16	2016-07-20	1	8-5-KOA1	NBKOA1	N	0	0	0	0	0	0	0	0	0	0	0	0	0	0	0	0	0	0
39	2016-05-16	2016-07-20	1	9-5-KOA1	NBKOA1	N	0	0	0	0	0	0	0	0	0	0	0	0	0	0	0	0	0	0
40	2016-05-16	2016-07-20	1	10-5-KOA1	NBKOA1	N	0	0	0	0	0	0	0	0	0	0	0	0	0	0	0	0	0	0
41	2016-05-16	2016-07-20	1	11-5-KOA1	NBKOA1	N	0	0	0	0	0	0	0	0	0	0	0	0	0	0	0	0	0	0
42	2016-05-16	2016-07-20	1	12-5-KOA1	NBKOA1	N	0	0	0	0	0	0	0	0	0	0	0	0	0	0	0	0	0	0
43	2016-05-16	2016-07-20	1	13-5-KOA1	NBKOA1	N	0	0	0	0	0	0	0	0	0	0	0	0	0	0	0	0	0	0
44	2016-05-16	2016-07-20	1	14-5-KOA1	NBKOA1	N	0	0	0	0	0	0	0	0	0	0	0	0	0	0	0	0	0	0
45	2016-05-16	2016-07-20	1	15-5-KOA1	NBKOA1	N	0	0	0	0	0	0	0	0	0	0	0	0	0	0	0	0	0	0
46	2016-06-03	2016-07-21	1	1-6-JCU4	NBJCU4	N	0	0	0	0	0	0	0	0	0	0	0	0	0	0	0	0	0	0
47	2016-06-03	2016-07-21	1	2-6-JCU4	NBJCU4	N	0	0	0	0	0	0	0	0	0	0	0	0	0	0	0	0	0	0
48	2016-06-03	2016-07-21	1	3-6-JCU4	NBJCU4	N	0	0	0	0	0	0	0	0	0	0	0	0	0	0	0	0	0	0
49	2016-06-03	2016-07-21	1	4-6-JCU4	NBJCU4	N	0	0	0	0	0	0	0	0	0	0	0	0	0	0	0	0	0	0
50	2016-06-03	2016-07-21	1	5-6-JCU4	NBJCU4	N	0	0	0	0	0	0	0	0	0	0	0	0	0	0	0	0	0	0
51	2016-06-03	2016-07-21	1	6-6-JCU4	NBJCU4	N	0	0	0	0	0	0	0	0	0	0	0	0	0	0	0	0	0	0
52	2016-06-03	2016-07-21	1	7-6-JCU4	NBJCU4	N	0	0	0	0	0	0	0	0	0	0	0	0	0	0	0	0	0	0
53	2016-06-03	2016-07-21	1	8-6-JCU4	NBJCU4	N	0	0	0	0	0	0	0	0	0	0	0	0	0	0	0	0	0	0
54	2016-06-03	2016-07-21	1	9-6-JCU4	NBJCU4	N	0	0	0	0	0	0	0	0	0	0	0	0	0	0	0	0	0	0
55	2016-06-03	2016-07-21	1	10-6-JCU4	NBJCU4	N	0	0	0	0	0	0	0	0	0	0	0	0	0	0	0	0	0	0
56	2016-06-03	2016-07-21	1	11-6-JCU4	NBJCU4	N	0	0	0	0	0	0	0	0	0	0	0	0	0	0	0	0	0	0
57	2016-06-03	2016-07-21	1	12-6-JCU4	NBJCU4	N	0	0	0	0	0	0	0	0	0	0	0	0	0	0	0	0	0	0
58	2016-06-03	2016-07-21	1	13-6-JCU4	NBJCU4	N	0	0	0	0	0	0	0	0	0	0	0	0	0	0	0	0	0	0
59	2016-06-03	2016-07-21	1	14-6-JCU4	NBJCU4	N	0	0	0	0	0	0	0	0	0	0	0	0	0	0	0	0	0	0
60	2016-06-03	2016-07-21	1	15-6-JCU4	NBJCU4	N	0	0	0	0	0	0	0	0	0	0	0	0	0	0	0	0	0	0
61	2016-06-03	2016-07-21	1	1-6-KOA1	NBKOA1	N	0	0	0	0	0	0	0	0	0	0	0	0	0	0	0	0	0	0
62	2016-06-03	2016-07-21	1	2-6-KOA1	NBKOA1	N	0	0	0	0	0	0	0	0	0	0	0	0	0	0	0	0	0	0
63	2016-06-03	2016-07-21	1	3-6-KOA1	NBKOA1	N	0	0	0	0	0	0	0	0	0	0	0	0	0	0	0	0	0	0
64	2016-06-03	2016-07-21	1	4-6-KOA1	NBKOA1	N	0	0	0	0	0	0	0	0	0	0	0	0	0	0	0	0	0	0
65	2016-06-03	2016-07-21	1	5-6-KOA1	NBKOA1	N	0	0	0	0	0	0	0	0	0	0	0	0	0	0	0	0	0	0
66	2016-06-03	2016-07-21	1	6-6-KOA1	NBKOA1	N	0	0	0	0	0	0	0	0	0	0	0	0	0	0	0	0	0	0
67	2016-06-03	2016-07-21	1	7-6-KOA1	NBKOA1	N	0	0	0	0	0	0	0	0	0	0	0	0	0	0	0	0	0	0
68	2016-06-03	2016-07-21	1	8-6-KOA1	NBKOA1	N	0	0	0	0	0	0	0	0	0	0	0	0	0	0	0	0	0	0
69	2016-06-03	2016-07-21	1	9-6-KOA1	NBKOA1	N	0	0	0	0	0	0	0	0	0	0	0	0	0	0	0	0	0	0
70	2016-06-03	2016-07-21	1	10-6-KOA1	NBKOA1	N	0	0	0	0	0	0	0	0	0	0	0	0	0	0	0	0	0	0
71	2016-06-03	2016-07-21	1	11-6-KOA1	NBKOA1	N	0	0	0	0	0	0	0	0	0	0	0	0	0	0	0	0	0	0
72	2016-06-03	2016-07-21	1	12-6-KOA1	NBKOA1	N	0	0	0	0	0	0	0	0	0	0	0	0	0	0	0	0	0	0
73	2016-06-03	2016-07-21	1	13-6-KOA1	NBKOA1	N	0	0	0	0	0	0	0	0	0	0	0	0	0	0	0	0	0	0
74	2016-06-03	2016-07-21	1	14-6-KOA1	NBKOA1	N	0	0	0	0	0	0	0	0	0	0	0	0	0	0	0	0	0	0
75	2016-06-03	2016-07-21	1	15-6-KOA1	NBKOA1	N	0	0	0	0	0	0	0	0	0	0	0	0	0	0	0	0	0	0
76	2016-06-03	2016-07-21	1	1-6-KUR2	NBKUR2	Y	6.5	0	10	2	1	2	3	2	3	1	0	1	1	0	10	3	13	26000
77	2016-06-03	2016-07-21	1	2-6-KUR2	NBKUR2	N	0	0	0	0	0	0	0	0	0	0	0	0	0	0	0	0	0	0
78	2016-06-03	2016-07-21	1	3-6-KUR2	NBKUR2	N	0	0	0	0	0	0	0	0	0	0	0	0	0	0	0	0	0	0
79	2016-06-03	2016-07-21	1	4-6-KUR2	NBKUR2	N	0	0	0	0	0	0	0	0	0	0	0	0	0	0	0	0	0	0
80	2016-06-03	2016-07-21	1	5-6-KUR2	NBKUR2	N	0	0	0	0	0	0	0	0	0	0	0	0	0	0	0	0	0	0
81	2016-06-03	2016-07-21	1	6-6-KUR2	NBKUR2	N	0	0	0	0	0	0	0	0	0	0	0	0	0	0	0	0	0	0
82	2016-06-03	2016-07-21	1	7-6-KUR2	NBKUR2	Y	6	0	6	1	1	1	2	1	6	2	1	2	1	0	6	6	12	24000
83	2016-06-03	2016-07-21	1	8-6-KUR2	NBKUR2	N	0	0	0	0	0	0	0	0	0	0	0	0	0	0	0	0	0	0
84	2016-06-03	2016-07-21	1	9-6-KUR2	NBKUR2	N	0	0	0	0	0	0	0	0	0	0	0	0	0	0	0	0	0	0
85	2016-06-03	2016-07-21	1	10-6-KUR2	NBKUR2	N	0	0	0	0	0	0	0	0	0	0	0	0	0	0	0	0	0	0
86	2016-06-03	2016-07-21	1	11-6-KUR2	NBKUR2	N	0	0	0	0	0	0	0	0	0	0	0	0	0	0	0	0	0	0
87	2016-06-03	2016-07-21	1	12-6-KUR2	NBKUR2	N	0	0	0	0	0	0	0	0	0	0	0	0	0	0	0	0	0	0
88	2016-06-03	2016-07-21	1	13-6-KUR2	NBKUR2	N	0	0	0	0	0	0	0	0	0	0	0	0	0	0	0	0	0	0
89	2016-06-03	2016-07-21	1	14-6-KUR2	NBKUR2	N	0	0	0	0	0	0	0	0	0	0	0	0	0	0	0	0	0	0
90	2016-06-03	2016-07-21	1	15-6-KUR2	NBKUR2	N	0	0	0	0	0	0	0	0	0	0	0	0	0	0	0	0	0	0
91	2016-06-05	2016-07-21	1	1-6-KUR3	NBKUR3	Y	11.5	0	12	3	2	3	3	1	11	2	3	1	2	3	12	11	23	46000
92	2016-06-05	2016-07-21	1	2-6-KUR3	NBKUR3	Y	11	0	11	2	2	3	2	2	11	1	2	2	3	3	11	11	22	44000
93	2016-06-05	2016-07-21	1	3-6-KUR3	NBKUR3	Y	7.5	0	5	1	1	1	1	1	10	1	3	2	3	1	5	10	15	30000
94	2016-06-05	2016-07-21	1	4-6-KUR3	NBKUR3	N	0	0	0	0	0	0	0	0	0	0	0	0	0	0	0	0	0	0
95	2016-06-05	2016-07-21	1	5-6-KUR3	NBKUR3	N	0	0	0	0	0	0	0	0	0	0	0	0	0	0	0	0	0	0
96	2016-06-05	2016-07-21	1	6-6-KUR3	NBKUR3	N	0	0	0	0	0	0	0	0	0	0	0	0	0	0	0	0	0	0
97	2016-06-05	2016-07-21	1	7-6-KUR3	NBKUR3	N	0	0	0	0	0	0	0	0	0	0	0	0	0	0	0	0	0	0
98	2016-06-05	2016-07-21	1	8-6-KUR3	NBKUR3	N	0	0	0	0	0	0	0	0	0	0	0	0	0	0	0	0	0	0
99	2016-06-05	2016-07-21	1	9-6-KUR3	NBKUR3	N	0	0	0	0	0	0	0	0	0	0	0	0	0	0	0	0	0	0
100	2016-06-05	2016-07-21	1	10-6-KUR3	NBKUR3	N	0	0	0	0	0	0	0	0	0	0	0	0	0	0	0	0	0	0
101	2016-06-05	2016-07-21	1	11-6-KUR3	NBKUR3	N	0	0	0	0	0	0	0	0	0	0	0	0	0	0	0	0	0	0
102	2016-06-05	2016-07-21	1	12-6-KUR3	NBKUR3	N	0	0	0	0	0	0	0	0	0	0	0	0	0	0	0	0	0	0
103	2016-06-05	2016-07-21	1	13-6-KUR3	NBKUR3	N	0	0	0	0	0	0	0	0	0	0	0	0	0	0	0	0	0	0
104	2016-06-05	2016-07-21	1	14-6-KUR3	NBKUR3	N	0	0	0	0	0	0	0	0	0	0	0	0	0	0	0	0	0	0
105	2016-06-05	2016-07-21	1	15-6-KUR3	NBKUR3	N	0	0	0	0	0	0	0	0	0	0	0	0	0	0	0	0	0	0
106	2016-06-05	2016-07-21	1	1-6-KUR4	NBKUR4	N	0	0	0	0	0	0	0	0	0	0	0	0	0	0	0	0	0	0
107	2016-06-05	2016-07-21	1	2-6-KUR4	NBKUR4	N	0	0	0	0	0	0	0	0	0	0	0	0	0	0	0	0	0	0
108	2016-06-05	2016-07-21	1	3-6-KUR4	NBKUR4	N	0	0	0	0	0	0	0	0	0	0	0	0	0	0	0	0	0	0
109	2016-06-05	2016-07-21	1	4-6-KUR4	NBKUR4	N	0	0	0	0	0	0	0	0	0	0	0	0	0	0	0	0	0	0
110	2016-06-05	2016-07-21	1	5-6-KUR4	NBKUR4	N	0	0	0	0	0	0	0	0	0	0	0	0	0	0	0	0	0	0
111	2016-06-05	2016-07-21	1	6-6-KUR4	NBKUR4	Y	9.5	0	9	2	2	2	1	2	10	3	1	3	2	1	9	10	19	38000
112	2016-06-05	2016-07-21	1	7-6-KUR4	NBKUR4	Y	6.5	0	8	2	2	2	1	1	5	0	1	2	2	0	8	5	13	26000
113	2016-06-05	2016-07-21	1	8-6-KUR4	NBKUR4	Y	11.5	0	14	3	2	3	3	3	9	1	2	2	2	2	14	9	23	46000
114	2016-06-05	2016-07-21	1	9-6-KUR4	NBKUR4	N	0	0	0	0	0	0	0	0	0	0	0	0	0	0	0	0	0	0
115	2016-06-05	2016-07-21	1	10-6-KUR4	NBKUR4	N	0	0	0	0	0	0	0	0	0	0	0	0	0	0	0	0	0	0
116	2016-06-05	2016-07-21	1	11-6-KUR4	NBKUR4	N	0	0	0	0	0	0	0	0	0	0	0	0	0	0	0	0	0	0
117	2016-06-05	2016-07-21	1	12-6-KUR4	NBKUR4	N	0	0	0	0	0	0	0	0	0	0	0	0	0	0	0	0	0	0
118	2016-06-05	2016-07-21	1	13-6-KUR4	NBKUR4	N	0	0	0	0	0	0	0	0	0	0	0	0	0	0	0	0	0	0
119	2016-06-05	2016-07-21	1	14-6-KUR4	NBKUR4	N	0	0	0	0	0	0	0	0	0	0	0	0	0	0	0	0	0	0
120	2016-06-05	2016-07-21	1	15-6-KUR4	NBKUR4	N	0	0	0	0	0	0	0	0	0	0	0	0	0	0	0	0	0	0
121	2016-06-05	2016-07-21	1	1-6-SPE3	NBSPE3	N	0	0	0	0	0	0	0	0	0	0	0	0	0	0	0	0	0	0
122	2016-06-05	2016-07-21	1	2-6-SPE3	NBSPE3	N	0	0	0	0	0	0	0	0	0	0	0	0	0	0	0	0	0	0
123	2016-06-05	2016-07-21	1	3-6-SPE3	NBSPE3	N	0	0	0	0	0	0	0	0	0	0	0	0	0	0	0	0	0	0
124	2016-06-05	2016-07-21	1	4-6-SPE3	NBSPE3	N	0	0	0	0	0	0	0	0	0	0	0	0	0	0	0	0	0	0
125	2016-06-05	2016-07-21	1	5-6-SPE3	NBSPE3	Y	13.5	0	14	2	3	3	3	3	13	3	3	2	2	3	14	13	27	54000
126	2016-06-05	2016-07-21	1	6-6-SPE3	NBSPE3	N	0	0	0	0	0	0	0	0	0	0	0	0	0	0	0	0	0	0
127	2016-06-05	2016-07-21	1	7-6-SPE3	NBSPE3	Y	8	0	12	3	3	3	2	1	4	0	1	1	1	1	12	4	16	32000
128	2016-06-05	2016-07-21	1	8-6-SPE3	NBSPE3	N	0	0	0	0	0	0	0	0	0	0	0	0	0	0	0	0	0	4
129	2016-06-05	2016-07-21	1	9-6-SPE3	NBSPE3	Y	8.5	0	10	3	2	2	1	2	7	1	0	2	2	2	10	7	17	34000
130	2016-06-05	2016-07-21	1	10-6-SPE3	NBSPE3	N	0	0	0	0	0	0	0	0	0	0	0	0	0	0	0	0	0	0
131	2016-06-05	2016-07-21	1	11-6-SPE3	NBSPE3	N	0	0	0	0	0	0	0	0	0	0	0	0	0	0	0	0	0	0
132	2016-06-05	2016-07-21	1	12-6-SPE3	NBSPE3	N	0	0	0	0	0	0	0	0	0	0	0	0	0	0	0	0	0	0
133	2016-06-05	2016-07-21	1	13-6-SPE3	NBSPE3	N	0	0	0	0	0	0	0	0	0	0	0	0	0	0	0	0	0	0
134	2016-06-05	2016-07-21	1	14-6-SPE3	NBSPE3	N	0	0	0	0	0	0	0	0	0	0	0	0	0	0	0	0	0	0
135	2016-06-05	2016-07-21	1	15-6-SPE3	NBSPE3	N	0	0	0	0	0	0	0	0	0	0	0	0	0	0	0	0	0	0
136	2016-07-02	2016-08-09	1	1-7-JCU4	NBJCU4	N	0	0	0	0	0	0	0	0	0	0	0	0	0	0	0	0	0	0
137	2016-07-02	2016-08-09	1	2-7-JCU4	NBJCU4	N	0	0	0	0	0	0	0	0	0	0	0	0	0	0	0	0	0	0
138	2016-07-02	2016-08-09	1	3-7-JCU4	NBJCU4	N	0	0	0	0	0	0	0	0	0	0	0	0	0	0	0	0	0	0
139	2016-07-02	2016-08-09	1	4-7-JCU4	NBJCU4	N	0	0	0	0	0	0	0	0	0	0	0	0	0	0	0	0	0	0
140	2016-07-02	2016-08-09	1	5-7-JCU4	NBJCU4	N	0	0	0	0	0	0	0	0	0	0	0	0	0	0	0	0	0	0
141	2016-07-02	2016-08-09	1	6-7-JCU4	NBJCU4	N	0	0	0	0	0	0	0	0	0	0	0	0	0	0	0	0	0	0
142	2016-07-02	2016-08-09	1	7-7-JCU4	NBJCU4	N	0	0	0	0	0	0	0	0	0	0	0	0	0	0	0	0	0	0
143	2016-07-02	2016-08-09	1	8-7-JCU4	NBJCU4	N	0	0	0	0	0	0	0	0	0	0	0	0	0	0	0	0	0	0
144	2016-07-02	2016-08-09	1	9-7-JCU4	NBJCU4	N	0	0	0	0	0	0	0	0	0	0	0	0	0	0	0	0	0	0
145	2016-07-02	2016-08-09	1	10-7-JCU4	NBJCU4	N	0	0	0	0	0	0	0	0	0	0	0	0	0	0	0	0	0	0
146	2016-07-02	2016-08-09	1	11-7-JCU4	NBJCU4	N	0	0	0	0	0	0	0	0	0	0	0	0	0	0	0	0	0	0
147	2016-07-02	2016-08-09	1	12-7-JCU4	NBJCU4	N	0	0	0	0	0	0	0	0	0	0	0	0	0	0	0	0	0	0
148	2016-07-02	2016-08-09	1	13-7-JCU4	NBJCU4	N	0	0	0	0	0	0	0	0	0	0	0	0	0	0	0	0	0	0
149	2016-07-02	2016-08-09	1	14-7-JCU4	NBJCU4	N	0	0	0	0	0	0	0	0	0	0	0	0	0	0	0	0	0	0
150	2016-07-02	2016-08-09	1	15-7-JCU4	NBJCU4	N	0	0	0	0	0	0	0	0	0	0	0	0	0	0	0	0	0	0
151	2016-07-02	2016-08-09	1	1-7-KOA1	NBKOA1	N	0	0	0	0	0	0	0	0	0	0	0	0	0	0	0	0	0	0
152	2016-07-02	2016-08-09	1	2-7-KOA1	NBKOA1	N	0	0	0	0	0	0	0	0	0	0	0	0	0	0	0	0	0	0
153	2016-07-02	2016-08-09	1	3-7-KOA1	NBKOA1	N	0	0	0	0	0	0	0	0	0	0	0	0	0	0	0	0	0	0
154	2016-07-02	2016-08-09	1	4-7-KOA1	NBKOA1	N	0	0	0	0	0	0	0	0	0	0	0	0	0	0	0	0	0	0
155	2016-07-02	2016-08-09	1	5-7-KOA1	NBKOA1	N	0	0	0	0	0	0	0	0	0	0	0	0	0	0	0	0	0	0
156	2016-07-02	2016-08-09	1	6-7-KOA1	NBKOA1	N	0	0	0	0	0	0	0	0	0	0	0	0	0	0	0	0	0	0
157	2016-07-02	2016-08-09	1	7-7-KOA1	NBKOA1	N	0	0	0	0	0	0	0	0	0	0	0	0	0	0	0	0	0	0
158	2016-07-02	2016-08-09	1	8-7-KOA1	NBKOA1	N	0	0	0	0	0	0	0	0	0	0	0	0	0	0	0	0	0	0
159	2016-07-02	2016-08-09	1	9-7-KOA1	NBKOA1	N	0	0	0	0	0	0	0	0	0	0	0	0	0	0	0	0	0	0
160	2016-07-02	2016-08-09	1	10-7-KOA1	NBKOA1	N	0	0	0	0	0	0	0	0	0	0	0	0	0	0	0	0	0	0
161	2016-07-02	2016-08-09	1	11-7-KOA1	NBKOA1	N	0	0	0	0	0	0	0	0	0	0	0	0	0	0	0	0	0	0
162	2016-07-02	2016-08-09	1	12-7-KOA1	NBKOA1	N	0	0	0	0	0	0	0	0	0	0	0	0	0	0	0	0	0	0
163	2016-07-02	2016-08-09	1	13-7-KOA1	NBKOA1	N	0	0	0	0	0	0	0	0	0	0	0	0	0	0	0	0	0	0
164	2016-07-02	2016-08-09	1	14-7-KOA1	NBKOA1	N	0	0	0	0	0	0	0	0	0	0	0	0	0	0	0	0	0	0
165	2016-07-02	2016-08-09	1	15-7-KOA1	NBKOA1	N	0	0	0	0	0	0	0	0	0	0	0	0	0	0	0	0	0	0
166	2016-07-02	2016-08-09	1	1-7-KUR2	NBKUR2	N	0	0	0	0	0	0	0	0	0	0	0	0	0	0	0	0	0	0
167	2016-07-02	2016-08-09	1	2-7-KUR2	NBKUR2	N	0	0	0	0	0	0	0	0	0	0	0	0	0	0	0	0	0	0
168	2016-07-02	2016-08-09	1	3-7-KUR2	NBKUR2	N	0	0	0	0	0	0	0	0	0	0	0	0	0	0	0	0	0	0
169	2016-07-02	2016-08-09	1	4-7-KUR2	NBKUR2	N	0	0	0	0	0	0	0	0	0	0	0	0	0	0	0	0	0	0
170	2016-07-02	2016-08-09	1	5-7-KUR2	NBKUR2	N	0	0	0	0	0	0	0	0	0	0	0	0	0	0	0	0	0	0
171	2016-07-02	2016-08-09	1	6-7-KUR2	NBKUR2	N	0	0	0	0	0	0	0	0	0	0	0	0	0	0	0	0	0	0
172	2016-07-02	2016-08-09	1	7-7-KUR2	NBKUR2	N	0	0	0	0	0	0	0	0	0	0	0	0	0	0	0	0	0	0
173	2016-07-02	2016-08-09	1	8-7-KUR2	NBKUR2	N	0	0	0	0	0	0	0	0	0	0	0	0	0	0	0	0	0	0
174	2016-07-02	2016-08-09	1	9-7-KUR2	NBKUR2	N	0	0	0	0	0	0	0	0	0	0	0	0	0	0	0	0	0	0
175	2016-07-02	2016-08-09	1	10-7-KUR2	NBKUR2	N	0	0	0	0	0	0	0	0	0	0	0	0	0	0	0	0	0	0
176	2016-07-02	2016-08-09	1	11-7-KUR2	NBKUR2	N	0	0	0	0	0	0	0	0	0	0	0	0	0	0	0	0	0	0
177	2016-07-02	2016-08-09	1	12-7-KUR2	NBKUR2	N	0	0	0	0	0	0	0	0	0	0	0	0	0	0	0	0	0	0
178	2016-07-02	2016-08-09	1	13-7-KUR2	NBKUR2	N	0	0	0	0	0	0	0	0	0	0	0	0	0	0	0	0	0	0
179	2016-07-02	2016-08-09	1	14-7-KUR2	NBKUR2	N	0	0	0	0	0	0	0	0	0	0	0	0	0	0	0	0	0	0
180	2016-07-02	2016-08-09	1	15-7-KUR2	NBKUR2	N	0	0	0	0	0	0	0	0	0	0	0	0	0	0	0	0	0	0
181	2016-07-03	2016-08-09	1	1-7-KUR3	NBKUR3	N	0	0	0	0	0	0	0	0	0	0	0	0	0	0	0	0	0	0
182	2016-07-03	2016-08-09	1	2-7-KUR3	NBKUR3	N	0	0	0	0	0	0	0	0	0	0	0	0	0	0	0	0	0	0
183	2016-07-03	2016-08-09	1	3-7-KUR3	NBKUR3	N	0	0	0	0	0	0	0	0	0	0	0	0	0	0	0	0	0	0
184	2016-07-03	2016-08-09	1	4-7-KUR3	NBKUR3	N	0	0	0	0	0	0	0	0	0	0	0	0	0	0	0	0	0	0
185	2016-07-03	2016-08-09	1	5-7-KUR3	NBKUR3	N	0	0	0	0	0	0	0	0	0	0	0	0	0	0	0	0	0	0
186	2016-07-03	2016-08-09	1	6-7-KUR3	NBKUR3	N	0	0	0	0	0	0	0	0	0	0	0	0	0	0	0	0	0	0
187	2016-07-03	2016-08-09	1	7-7-KUR3	NBKUR3	N	0	0	0	0	0	0	0	0	0	0	0	0	0	0	0	0	0	0
188	2016-07-03	2016-08-09	1	8-7-KUR3	NBKUR3	N	0	0	0	0	0	0	0	0	0	0	0	0	0	0	0	0	0	0
189	2016-07-03	2016-08-09	1	9-7-KUR3	NBKUR3	N	0	0	0	0	0	0	0	0	0	0	0	0	0	0	0	0	0	0
190	2016-07-03	2016-08-09	1	10-7-KUR3	NBKUR3	N	0	0	0	0	0	0	0	0	0	0	0	0	0	0	0	0	0	0
191	2016-07-03	2016-08-09	1	11-7-KUR3	NBKUR3	N	0	0	0	0	0	0	0	0	0	0	0	0	0	0	0	0	0	0
192	2016-07-03	2016-08-09	1	12-7-KUR3	NBKUR3	N	0	0	0	0	0	0	0	0	0	0	0	0	0	0	0	0	0	0
193	2016-07-03	2016-08-09	1	13-7-KUR3	NBKUR3	N	0	0	0	0	0	0	0	0	0	0	0	0	0	0	0	0	0	0
194	2016-07-03	2016-08-09	1	14-7-KUR3	NBKUR3	Y	23	0	22	5	4	3	5	5	24	5	6	4	4	5	22	24	46	92000
195	2016-07-03	2016-08-09	1	15-7-KUR3	NBKUR3	N	0	0	0	0	0	0	0	0	0	0	0	0	0	0	0	0	0	0
196	2016-07-03	2016-08-09	1	1-7-KUR4	NBKUR4	N	0	0	0	0	0	0	0	0	0	0	0	0	0	0	0	0	0	0
197	2016-07-03	2016-08-09	1	2-7-KUR4	NBKUR4	N	0	0	0	0	0	0	0	0	0	0	0	0	0	0	0	0	0	0
198	2016-07-03	2016-08-09	1	3-7-KUR4	NBKUR4	N	0	0	0	0	0	0	0	0	0	0	0	0	0	0	0	0	0	0
199	2016-07-03	2016-08-09	1	4-7-KUR4	NBKUR4	N	0	0	0	0	0	0	0	0	0	0	0	0	0	0	0	0	0	0
200	2016-07-03	2016-08-09	1	5-7-KUR4	NBKUR4	N	0	0	0	0	0	0	0	0	0	0	0	0	0	0	0	0	0	0
201	2016-07-03	2016-08-09	1	6-7-KUR4	NBKUR4	N	0	0	0	0	0	0	0	0	0	0	0	0	0	0	0	0	0	0
202	2016-07-03	2016-08-09	1	7-7-KUR4	NBKUR4	N	0	0	0	0	0	0	0	0	0	0	0	0	0	0	0	0	0	0
203	2016-07-03	2016-08-09	1	8-7-KUR4	NBKUR4	N	0	0	0	0	0	0	0	0	0	0	0	0	0	0	0	0	0	0
204	2016-07-03	2016-08-09	1	9-7-KUR4	NBKUR4	N	0	0	0	0	0	0	0	0	0	0	0	0	0	0	0	0	0	0
205	2016-07-03	2016-08-09	1	10-7-KUR4	NBKUR4	N	0	0	0	0	0	0	0	0	0	0	0	0	0	0	0	0	0	0
206	2016-07-03	2016-08-09	1	11-7-KUR4	NBKUR4	N	0	0	0	0	0	0	0	0	0	0	0	0	0	0	0	0	0	0
207	2016-07-03	2016-08-09	1	12-7-KUR4	NBKUR4	N	0	0	0	0	0	0	0	0	0	0	0	0	0	0	0	0	0	0
208	2016-07-03	2016-08-09	1	13-7-KUR4	NBKUR4	N	0	0	0	0	0	0	0	0	0	0	0	0	0	0	0	0	0	0
209	2016-07-03	2016-08-09	1	14-7-KUR4	NBKUR4	N	0	0	0	0	0	0	0	0	0	0	0	0	0	0	0	0	0	0
210	2016-07-03	2016-08-09	1	15-7-KUR4	NBKUR4	N	0	0	0	0	0	0	0	0	0	0	0	0	0	0	0	0	0	0
211	2016-07-03	2016-08-01	1	1-7-SPE3	NBSPE3	N	0	0	0	0	0	0	0	0	0	0	0	0	0	0	0	0	0	0
212	2016-07-03	2016-08-01	1	2-7-SPE3	NBSPE3	N	0	0	0	0	0	0	0	0	0	0	0	0	0	0	0	0	0	0
213	2016-07-03	2016-08-01	1	3-7-SPE3	NBSPE3	Y	4.5	0	3	1	0	1	1	0	6	1	2	2	0	1	3	6	9	18000
214	2016-07-03	2016-08-01	1	4-7-SPE3	NBSPE3	N	0	0	0	0	0	0	0	0	0	0	0	0	0	0	0	0	0	0
215	2016-07-03	2016-08-01	1	5-7-SPE3	NBSPE3	N	0	0	0	0	0	0	0	0	0	0	0	0	0	0	0	0	0	0
216	2016-07-03	2016-08-01	1	6-7-SPE3	NBSPE3	N	0	0	0	0	0	0	0	0	0	0	0	0	0	0	0	0	0	0
217	2016-07-03	2016-08-01	1	7-7-SPE3	NBSPE3	N	0	0	0	0	0	0	0	0	0	0	0	0	0	0	0	0	0	0
218	2016-07-03	2016-08-01	1	8-7-SPE3	NBSPE3	N	0	0	0	0	0	0	0	0	0	0	0	0	0	0	0	0	0	0
219	2016-07-03	2016-08-01	1	9-7-SPE3	NBSPE3	N	0	0	0	0	0	0	0	0	0	0	0	0	0	0	0	0	0	0
220	2016-07-03	2016-08-01	1	10-7-SPE3	NBSPE3	N	0	0	0	0	0	0	0	0	0	0	0	0	0	0	0	0	0	0
221	2016-07-03	2016-08-01	1	11-7-SPE3	NBSPE3	N	0	0	0	0	0	0	0	0	0	0	0	0	0	0	0	0	0	0
222	2016-07-03	2016-08-01	1	12-7-SPE3	NBSPE3	Y	4.5	0	5	2	2	1	0	0	4	1	1	1	1	0	5	4	9	18000
223	2016-07-03	2016-08-01	1	13-7-SPE3	NBSPE3	Y	2.5	0	2	0	0	1	0	1	3	0	1	0	1	1	2	3	5	10000
224	2016-07-03	2016-08-01	1	14-7-SPE3	NBSPE3	N	0	0	0	0	0	0	0	0	0	0	0	0	0	0	0	0	0	0
225	2016-07-03	2016-08-01	1	15-7-SPE3	NBSPE3	N	0	0	0	0	0	0	0	0	0	0	0	0	0	0	0	0	0	0
226	2016-08-02	2016-08-16	1	1-8-JCU4	NBJCU4	N	0	0	0	0	0	0	0	0	0	0	0	0	0	0	0	0	0	0
227	2016-08-02	2016-08-16	1	2-8-JCU4	NBJCU4	N	0	0	0	0	0	0	0	0	0	0	0	0	0	0	0	0	0	0
228	2016-08-02	2016-08-16	1	3-8-JCU4	NBJCU4	N	0	0	0	0	0	0	0	0	0	0	0	0	0	0	0	0	0	0
229	2016-08-02	2016-08-16	1	4-8-JCU4	NBJCU4	N	0	0	0	0	0	0	0	0	0	0	0	0	0	0	0	0	0	0
230	2016-08-02	2016-08-16	1	5-8-JCU4	NBJCU4	N	0	0	0	0	0	0	0	0	0	0	0	0	0	0	0	0	0	0
231	2016-08-02	2016-08-16	1	6-8-JCU4	NBJCU4	N	0	0	0	0	0	0	0	0	0	0	0	0	0	0	0	0	0	0
232	2016-08-02	2016-08-16	1	7-8-JCU4	NBJCU4	N	0	0	0	0	0	0	0	0	0	0	0	0	0	0	0	0	0	0
233	2016-08-02	2016-08-16	1	8-8-JCU4	NBJCU4	N	0	0	0	0	0	0	0	0	0	0	0	0	0	0	0	0	0	0
234	2016-08-02	2016-08-16	1	9-8-JCU4	NBJCU4	N	0	0	0	0	0	0	0	0	0	0	0	0	0	0	0	0	0	0
235	2016-08-02	2016-08-16	1	10-8-JCU4	NBJCU4	N	0	0	0	0	0	0	0	0	0	0	0	0	0	0	0	0	0	0
236	2016-08-02	2016-08-16	1	11-8-JCU4	NBJCU4	N	0	0	0	0	0	0	0	0	0	0	0	0	0	0	0	0	0	0
237	2016-08-02	2016-08-16	1	12-8-JCU4	NBJCU4	N	0	0	0	0	0	0	0	0	0	0	0	0	0	0	0	0	0	0
238	2016-08-02	2016-08-16	1	13-8-JCU4	NBJCU4	N	0	0	0	0	0	0	0	0	0	0	0	0	0	0	0	0	0	0
239	2016-08-02	2016-08-16	1	14-8-JCU4	NBJCU4	N	0	0	0	0	0	0	0	0	0	0	0	0	0	0	0	0	0	0
240	2016-08-02	2016-08-16	1	15-8-JCU4	NBJCU4	N	0	0	0	0	0	0	0	0	0	0	0	0	0	0	0	0	0	0
241	2016-08-02	2016-08-16	1	1-8-KOA1	NBKOA1	N	0	0	0	0	0	0	0	0	0	0	0	0	0	0	0	0	0	0
242	2016-08-02	2016-08-16	1	2-8-KOA1	NBKOA1	N	0	0	0	0	0	0	0	0	0	0	0	0	0	0	0	0	0	0
243	2016-08-02	2016-08-16	1	3-8-KOA1	NBKOA1	N	0	0	0	0	0	0	0	0	0	0	0	0	0	0	0	0	0	0
244	2016-08-02	2016-08-16	1	4-8-KOA1	NBKOA1	N	0	0	0	0	0	0	0	0	0	0	0	0	0	0	0	0	0	0
245	2016-08-02	2016-08-16	1	5-8-KOA1	NBKOA1	N	0	0	0	0	0	0	0	0	0	0	0	0	0	0	0	0	0	0
246	2016-08-02	2016-08-16	1	6-8-KOA1	NBKOA1	N	0	0	0	0	0	0	0	0	0	0	0	0	0	0	0	0	0	0
247	2016-08-02	2016-08-16	1	7-8-KOA1	NBKOA1	N	0	0	0	0	0	0	0	0	0	0	0	0	0	0	0	0	0	0
248	2016-08-02	2016-08-16	1	8-8-KOA1	NBKOA1	N	0	0	0	0	0	0	0	0	0	0	0	0	0	0	0	0	0	0
249	2016-08-02	2016-08-16	1	9-8-KOA1	NBKOA1	N	0	0	0	0	0	0	0	0	0	0	0	0	0	0	0	0	0	0
250	2016-08-02	2016-08-16	1	10-8-KOA1	NBKOA1	N	0	0	0	0	0	0	0	0	0	0	0	0	0	0	0	0	0	0
251	2016-08-02	2016-08-16	1	11-8-KOA1	NBKOA1	N	0	0	0	0	0	0	0	0	0	0	0	0	0	0	0	0	0	0
252	2016-08-02	2016-08-16	1	12-8-KOA1	NBKOA1	N	0	0	0	0	0	0	0	0	0	0	0	0	0	0	0	0	0	0
253	2016-08-02	2016-08-16	1	13-8-KOA1	NBKOA1	N	0	0	0	0	0	0	0	0	0	0	0	0	0	0	0	0	0	0
254	2016-08-02	2016-08-16	1	14-8-KOA1	NBKOA1	N	0	0	0	0	0	0	0	0	0	0	0	0	0	0	0	0	0	0
255	2016-08-02	2016-08-16	1	15-8-KOA1	NBKOA1	N	0	0	0	0	0	0	0	0	0	0	0	0	0	0	0	0	0	0
256	2016-08-02	2016-08-16	1	1-8-KUR2	NBKUR2	N	0	0	0	0	0	0	0	0	0	0	0	0	0	0	0	0	0	0
257	2016-08-02	2016-08-16	1	2-8-KUR2	NBKUR2	N	0	0	0	0	0	0	0	0	0	0	0	0	0	0	0	0	0	0
258	2016-08-02	2016-08-16	1	3-8-KUR2	NBKUR2	N	0	0	0	0	0	0	0	0	0	0	0	0	0	0	0	0	0	0
259	2016-08-02	2016-08-16	1	4-8-KUR2	NBKUR2	N	0	0	0	0	0	0	0	0	0	0	0	0	0	0	0	0	0	0
260	2016-08-02	2016-08-16	1	5-8-KUR2	NBKUR2	N	0	0	0	0	0	0	0	0	0	0	0	0	0	0	0	0	0	0
261	2016-08-02	2016-08-16	1	6-8-KUR2	NBKUR2	N	0	0	0	0	0	0	0	0	0	0	0	0	0	0	0	0	0	0
262	2016-08-02	2016-08-16	1	7-8-KUR2	NBKUR2	N	0	0	0	0	0	0	0	0	0	0	0	0	0	0	0	0	0	0
263	2016-08-02	2016-08-16	1	8-8-KUR2	NBKUR2	N	0	0	0	0	0	0	0	0	0	0	0	0	0	0	0	0	0	0
264	2016-08-02	2016-08-16	1	9-8-KUR2	NBKUR2	N	0	0	0	0	0	0	0	0	0	0	0	0	0	0	0	0	0	0
265	2016-08-02	2016-08-16	1	10-8-KUR2	NBKUR2	N	0	0	0	0	0	0	0	0	0	0	0	0	0	0	0	0	0	0
266	2016-08-02	2016-08-16	1	11-8-KUR2	NBKUR2	N	0	0	0	0	0	0	0	0	0	0	0	0	0	0	0	0	0	0
267	2016-08-02	2016-08-16	1	12-8-KUR2	NBKUR2	N	0	0	0	0	0	0	0	0	0	0	0	0	0	0	0	0	0	0
268	2016-08-02	2016-08-16	1	13-8-KUR2	NBKUR2	N	0	0	0	0	0	0	0	0	0	0	0	0	0	0	0	0	0	0
269	2016-08-02	2016-08-16	1	14-8-KUR2	NBKUR2	N	0	0	0	0	0	0	0	0	0	0	0	0	0	0	0	0	0	0
270	2016-08-02	2016-08-16	1	15-8-KUR2	NBKUR2	N	0	0	0	0	0	0	0	0	0	0	0	0	0	0	0	0	0	0
271	2016-08-02	2016-08-08	1	1-8-KUR3	NBKUR3	N	0	0	0	0	0	0	0	0	0	0	0	0	0	0	0	0	0	0
272	2016-08-02	2016-08-08	1	2-8-KUR3	NBKUR3	N	0	0	0	0	0	0	0	0	0	0	0	0	0	0	0	0	0	0
273	2016-08-02	2016-08-08	1	3-8-KUR3	NBKUR3	N	0	0	0	0	0	0	0	0	0	0	0	0	0	0	0	0	0	0
274	2016-08-02	2016-08-08	1	4-8-KUR3	NBKUR3	N	0	0	0	0	0	0	0	0	0	0	0	0	0	0	0	0	0	0
275	2016-08-02	2016-08-08	1	5-8-KUR3	NBKUR3	N	0	0	0	0	0	0	0	0	0	0	0	0	0	0	0	0	0	0
276	2016-08-02	2016-08-08	1	6-8-KUR3	NBKUR3	N	0	0	0	0	0	0	0	0	0	0	0	0	0	0	0	0	0	0
277	2016-08-02	2016-08-08	1	7-8-KUR3	NBKUR3	N	0	0	0	0	0	0	0	0	0	0	0	0	0	0	0	0	0	0
278	2016-08-02	2016-08-08	1	8-8-KUR3	NBKUR3	N	0	0	0	0	0	0	0	0	0	0	0	0	0	0	0	0	0	0
279	2016-08-02	2016-08-08	1	9-8-KUR3	NBKUR3	N	0	0	0	0	0	0	0	0	0	0	0	0	0	0	0	0	0	0
280	2016-08-02	2016-08-08	1	10-8-KUR3	NBKUR3	N	0	0	0	0	0	0	0	0	0	0	0	0	0	0	0	0	0	0
281	2016-08-02	2016-08-08	1	11-8-KUR3	NBKUR3	N	0	0	0	0	0	0	0	0	0	0	0	0	0	0	0	0	0	0
282	2016-08-02	2016-08-08	1	12-8-KUR3	NBKUR3	N	0	0	0	0	0	0	0	0	0	0	0	0	0	0	0	0	0	0
283	2016-08-02	2016-08-08	1	13-8-KUR3	NBKUR3	N	0	0	0	0	0	0	0	0	0	0	0	0	0	0	0	0	0	0
284	2016-08-02	2016-08-08	1	14-8-KUR3	NBKUR3	N	0	0	0	0	0	0	0	0	0	0	0	0	0	0	0	0	0	0
285	2016-08-02	2016-08-08	1	15-8-KUR3	NBKUR3	N	0	0	0	0	0	0	0	0	0	0	0	0	0	0	0	0	0	0
286	2016-08-02	2016-08-08	1	1-8-KUR4	NBKUR4	N	0	0	0	0	0	0	0	0	0	0	0	0	0	0	0	0	0	0
287	2016-08-02	2016-08-08	1	2-8-KUR4	NBKUR4	N	0	0	0	0	0	0	0	0	0	0	0	0	0	0	0	0	0	0
288	2016-08-02	2016-08-08	1	3-8-KUR4	NBKUR4	N	0	0	0	0	0	0	0	0	0	0	0	0	0	0	0	0	0	0
289	2016-08-02	2016-08-08	1	4-8-KUR4	NBKUR4	N	0	0	0	0	0	0	0	0	0	0	0	0	0	0	0	0	0	0
290	2016-08-02	2016-08-08	1	5-8-KUR4	NBKUR4	N	0	0	0	0	0	0	0	0	0	0	0	0	0	0	0	0	0	0
291	2016-08-02	2016-08-08	1	6-8-KUR4	NBKUR4	N	0	0	0	0	0	0	0	0	0	0	0	0	0	0	0	0	0	0
292	2016-08-02	2016-08-08	1	7-8-KUR4	NBKUR4	N	0	0	0	0	0	0	0	0	0	0	0	0	0	0	0	0	0	0
293	2016-08-02	2016-08-08	1	8-8-KUR4	NBKUR4	N	0	0	0	0	0	0	0	0	0	0	0	0	0	0	0	0	0	0
294	2016-08-02	2016-08-08	1	9-8-KUR4	NBKUR4	N	0	0	0	0	0	0	0	0	0	0	0	0	0	0	0	0	0	0
295	2016-08-02	2016-08-08	1	10-8-KUR4	NBKUR4	N	0	0	0	0	0	0	0	0	0	0	0	0	0	0	0	0	0	0
296	2016-08-02	2016-08-08	1	11-8-KUR4	NBKUR4	N	0	0	0	0	0	0	0	0	0	0	0	0	0	0	0	0	0	0
297	2016-08-02	2016-08-08	1	12-8-KUR4	NBKUR4	N	0	0	0	0	0	0	0	0	0	0	0	0	0	0	0	0	0	0
298	2016-08-02	2016-08-08	1	13-8-KUR4	NBKUR4	N	0	0	0	0	0	0	0	0	0	0	0	0	0	0	0	0	0	0
299	2016-08-02	2016-08-08	1	14-8-KUR4	NBKUR4	N	0	0	0	0	0	0	0	0	0	0	0	0	0	0	0	0	0	0
300	2016-08-02	2016-08-08	1	15-8-KUR4	NBKUR4	N	0	0	0	0	0	0	0	0	0	0	0	0	0	0	0	0	0	0
301	2016-08-02	2016-08-08	1	1-8-SPE3	NBSPE3	N	0	0	0	0	0	0	0	0	0	0	0	0	0	0	0	0	0	0
302	2016-08-02	2016-08-08	1	2-8-SPE3	NBSPE3	N	0	0	0	0	0	0	0	0	0	0	0	0	0	0	0	0	0	0
303	2016-08-02	2016-08-08	1	3-8-SPE3	NBSPE3	N	0	0	0	0	0	0	0	0	0	0	0	0	0	0	0	0	0	0
304	2016-08-02	2016-08-08	1	4-8-SPE3	NBSPE3	N	0	0	0	0	0	0	0	0	0	0	0	0	0	0	0	0	0	0
305	2016-08-02	2016-08-08	1	5-8-SPE3	NBSPE3	Y	9.5	0	14	2	3	2	2	5	5	0	1	1	1	2	14	5	19	38000
306	2016-08-02	2016-08-08	1	6-8-SPE3	NBSPE3	N	0	0	0	0	0	0	0	0	0	0	0	0	0	0	0	0	0	0
307	2016-08-02	2016-08-08	1	7-8-SPE3	NBSPE3	N	0	0	0	0	0	0	0	0	0	0	0	0	0	0	0	0	0	0
308	2016-08-02	2016-08-08	1	8-8-SPE3	NBSPE3	N	0	0	0	0	0	0	0	0	0	0	0	0	0	0	0	0	0	0
309	2016-08-02	2016-08-08	1	9-8-SPE3	NBSPE3	N	0	0	0	0	0	0	0	0	0	0	0	0	0	0	0	0	0	0
310	2016-08-02	2016-08-08	1	10-8-SPE3	NBSPE3	N	0	0	0	0	0	0	0	0	0	0	0	0	0	0	0	0	0	0
311	2016-08-02	2016-08-08	1	11-8-SPE3	NBSPE3	Y	10.5	0	11	1	3	3	3	1	10	2	1	2	2	3	11	10	21	42000
312	2016-08-02	2016-08-08	1	12-8-SPE3	NBSPE3	N	0	0	0	0	0	0	0	0	0	0	0	0	0	0	0	0	0	0
313	2016-08-02	2016-08-08	1	13-8-SPE3	NBSPE3	N	0	0	0	0	0	0	0	0	0	0	0	0	0	0	0	0	0	0
314	2016-08-02	2016-08-08	1	14-8-SPE3	NBSPE3	N	0	0	0	0	0	0	0	0	0	0	0	0	0	0	0	0	0	0
315	2016-08-02	2016-08-08	1	15-8-SPE3	NBSPE3	N	0	0	0	0	0	0	0	0	0	0	0	0	0	0	0	0	0	0
316

## Sheet: Sheet1
	Column Labels
	0		1
Row Labels	Sum of flowerspct	Sum of sporect	Sum of flowerspct	Sum of sporect
A4-01			2300000	58500	3	A4-01			2300000	58500
01-NB1			460000	2000
01-NB2			460000	15500
01-NB3			460000	0
01-NB4			460000	0
01-NB5			460000	41000
A4-02			0	0	0
02-NB1			0	0
02-NB2			0	0
02-NB3			0	0
02-NB4			0	0
02-NB5			0	0
A4-03			1525000	293500	5
03-NB1			305000	42500
03-NB2			305000	51000
03-NB3			305000	69000
03-NB4			305000	30500
03-NB5			305000	100500
A4-04			650000	6500	1
04-NB1			130000	0
04-NB2			130000	0
04-NB3			130000	6500
04-NB4			130000	0
04-NB5			130000	0
A4-05			0	0	0
05-NB1			0	0
05-NB2			0	0
05-NB3			0	0
05-NB4			0	0
05-NB5			0	0
A4-06			0	0	0
06-NB1			0	0
06-NB2			0	0
06-NB3			0	0
06-NB4			0	0
06-NB5			0	0
A4-07			0	0	0
07-NB1			0	0
07-NB2			0	0
07-NB3			0	0
07-NB4			0	0
07-NB5			0	0
A4-08			750000	5000	1
08-NB1			150000	5000
08-NB2			150000	0
08-NB3			150000	0
08-NB4			150000	0
08-NB5			150000	0
A4-09			425000	296500	4
09-NB1			85000	61000
09-NB2			85000	57500
09-NB3			85000	139000
09-NB4			85000	0
09-NB5			85000	39000
A4-10			550000	215500	4
10-NB1			110000	0
10-NB2			110000	34000
10-NB3			110000	38500
10-NB4			110000	51500
10-NB5			110000	91500
A4-11			0	0	0
11-NB1			0	0
11-NB2			0	0
11-NB3			0	0
11-NB4			0	0
11-NB5			0	0
A4-12			600000	287000	3
12-NB1			120000	130000
12-NB2			120000	0
12-NB3			120000	0
12-NB4			120000	129000
12-NB5			120000	28000
A4-13			1300000	13000	1
13-NB1			260000	0
13-NB2			260000	13000
13-NB3			260000	0
13-NB4			260000	0
13-NB5			260000	0
A4-14			550000	2500	1
14-NB1			110000	0
14-NB2			110000	0
14-NB3			110000	2500
14-NB4			110000	0
14-NB5			110000	0
A4-15			0	0	0
15-NB1			0	0
15-NB2			0	0
15-NB3			0	0
15-NB4			0	0
15-NB5			0	0
A4-16	0	0
16-NB1	0	0
16-NB2	0	0
16-NB3	0	0
16-NB4	0	0
16-NB5	0	0
A4-17	0	0
17-NB1	0	0
17-NB2	0	0
17-NB3	0	0
17-NB4	0	0
17-NB5	0	0
A4-18	0	0
18-NB1	0	0
18-NB2	0	0
18-NB3	0	0
18-NB4	0	0
18-NB5	0	0
A4-19	0	0
19-NB1	0	0
19-NB2	0	0
19-NB3	0	0
19-NB4	0	0
19-NB5	0	0
A4-20	0	0
20-NB1	0	0
20-NB2	0	0
20-NB3	0	0
20-NB4	0	0
20-NB5	0	0
A4-21	0	0
21-NB1	0	0
21-NB2	0	0
21-NB3	0	0
21-NB4	0	0
21-NB5	0	0
A4-22	0	0
22-NB1	0	0
22-NB2	0	0
22-NB3	0	0
22-NB4	0	0
22-NB5	0	0
A4-23	0	0
23-NB1	0	0
23-NB2	0	0
23-NB3	0	0
23-NB4	0	0
23-NB5	0	0
A4-24	0	0
24-NB1	0	0
24-NB2	0	0
24-NB3	0	0
24-NB4	0	0
24-NB5	0	0
A4-25	0	0
25-NB1	0	0
25-NB2	0	0
25-NB3	0	0
25-NB4	0	0
25-NB5	0	0
A4-26	0	0
26-NB1	0	0
26-NB2	0	0
26-NB3	0	0
26-NB4	0	0
26-NB5	0	0
A4-27	0	0
27-NB1	0	0
27-NB2	0	0
27-NB3	0	0
27-NB4	0	0
27-NB5	0	0
A4-28	0	0
28-NB1	0	0
28-NB2	0	0
28-NB3	0	0
28-NB4	0	0
28-NB5	0	0
A4-29	0	0
29-NB1	0	0
29-NB2	0	0
29-NB3	0	0
29-NB4	0	0
29-NB5	0	0
A4-30	0	0
30-NB1	0	0
30-NB2	0	0
30-NB3	0	0
30-NB4	0	0
30-NB5	0	0
	flower spore count	bee spore counts	# positive Th
A4-01	2300000	58500	3
01-NB1	460000	2000
01-NB2	460000	15500
01-NB3	460000	0
01-NB4	460000	0
01-NB5	460000	41000
A4-02	0	0	0
02-NB1	0	0
02-NB2	0	0
02-NB3	0	0
02-NB4	0	0
02-NB5	0	0
A4-03	1525000	293500	5
03-NB1	305000	42500
03-NB2	305000	51000
03-NB3	305000	69000
03-NB4	305000	30500
03-NB5	305000	100500
A4-04	650000	6500	1
04-NB1	130000	0
04-NB2	130000	0
04-NB3	130000	6500
04-NB4	130000	0
04-NB5	130000	0
A4-05	0	0	0
05-NB1	0	0
05-NB2	0	0
05-NB3	0	0
05-NB4	0	0
05-NB5	0	0
A4-06	0	0	0
06-NB1	0	0
06-NB2	0	0
06-NB3	0	0
06-NB4	0	0
06-NB5	0	0
A4-07	0	0	0
07-NB1	0	0
07-NB2	0	0
07-NB3	0	0
07-NB4	0	0
07-NB5	0	0
A4-08	750000	5000	1
08-NB1	150000	5000
08-NB2	150000	0
08-NB3	150000	0
08-NB4	150000	0
08-NB5	150000	0
A4-09	425000	296500	4
09-NB1	85000	61000
09-NB2	85000	57500
09-NB3	85000	139000
09-NB4	85000	0
09-NB5	85000	39000
A4-10	550000	215500	4
10-NB1	110000	0
10-NB2	110000	34000
10-NB3	110000	38500
10-NB4	110000	51500
10-NB5	110000	91500
A4-11	0	0	0
11-NB1	0	0
11-NB2	0	0
11-NB3	0	0
11-NB4	0	0
11-NB5	0	0
A4-12	600000	287000	3
12-NB1	120000	130000
12-NB2	120000	0
12-NB3	120000	0
12-NB4	120000	129000
12-NB5	120000	28000
A4-13	1300000	13000	1
13-NB1	260000	0
13-NB2	260000	13000
13-NB3	260000	0
13-NB4	260000	0
13-NB5	260000	0
A4-14	550000	2500	1
14-NB1	110000	0
14-NB2	110000	0
14-NB3	110000	2500
14-NB4	110000	0
14-NB5	110000	0
A4-15	0	0	0
15-NB1	0	0
15-NB2	0	0
15-NB3	0	0
15-NB4	0	0
15-NB5	0	0
A4-16	0	0
16-NB1	0	0
16-NB2	0	0
16-NB3	0	0
16-NB4	0	0
16-NB5	0	0
A4-17	0	0
17-NB1	0	0
17-NB2	0	0
17-NB3	0	0
17-NB4	0	0
17-NB5	0	0
A4-18	0	0
18-NB1	0	0
18-NB2	0	0
18-NB3	0	0
18-NB4	0	0
18-NB5	0	0
A4-19	0	0
19-NB1	0	0
19-NB2	0	0
19-NB3	0	0
19-NB4	0	0
19-NB5	0	0
A4-20	0	0
20-NB1	0	0
20-NB2	0	0
20-NB3	0	0
20-NB4	0	0
20-NB5	0	0
A4-21	0	0
21-NB1	0	0
21-NB2	0	0
21-NB3	0	0
21-NB4	0	0
21-NB5	0	0
A4-22	0	0
22-NB1	0	0
22-NB2	0	0
22-NB3	0	0
22-NB4	0	0
22-NB5	0	0
A4-23	0	0
23-NB1	0	0
23-NB2	0	0
23-NB3	0	0
23-NB4	0	0
23-NB5	0	0
A4-24	0	0
24-NB1	0	0
24-NB2	0	0
24-NB3	0	0
24-NB4	0	0
24-NB5	0	0
A4-25	0	0
25-NB1	0	0
25-NB2	0	0
25-NB3	0	0
25-NB4	0	0
25-NB5	0	0
A4-26	0	0
26-NB1	0	0
26-NB2	0	0
26-NB3	0	0
26-NB4	0	0
26-NB5	0	0
A4-27	0	0
27-NB1	0	0
27-NB2	0	0
27-NB3	0	0
27-NB4	0	0
27-NB5	0	0
A4-28	0	0
28-NB1	0	0
28-NB2	0	0
28-NB3	0	0
28-NB4	0	0
28-NB5	0	0
A4-29	0	0
29-NB1	0	0
29-NB2	0	0
29-NB3	0	0
29-NB4	0	0
29-NB5	0	0
A4-30	0	0
30-NB1	0	0
30-NB2	0	0
30-NB3	0	0
30-NB4	0	0
30-NB5	0	0

## Sheet: Sheet2
		x 103
		flower spore count	T. hockingsi with spores
A4-01	C1	460	3
A4-02	C2	0	0
A4-03	C3	305	5
A4-04	C4	130	1
A4-05	C5	0	0
A4-06	C6	0	0
A4-07	C7	0	0
A4-08	C8	150	1
A4-09	C9	85	4
A4-10	C10	110	4
A4-11	C11	0	0
A4-12	C12	120	3
A4-13	C13	260	1
A4-14	C14	110	1
A4-15	C15	0	0
A4-16	16	0	0
A4-17	17	0	0
A4-18	18	0	0
A4-19	19	0	0
A4-20	20	0	0
A4-21	21	0	0
A4-22	22	0	0
A4-23	23	0	0
A4-24	24	0	0
A4-25	25	0	0
A4-26	26	0	0
A4-27	27	0	0
A4-28	28	0	0
A4-29	29	0	0
A4-30	30	0	0

## Sheet: flower transmission data
Unique#	cage	bee	trt_group	date	s_time	S_checked	NC	NC01	B_mean	flowerspct	sporect	B_SDrep1	B_sum1rep1	B_count11	B_count12	B_count13	B_count14	B_count15	B_sum2rep1	B_count21	B_count22	B_count23	B_count24	B_count25	B_sum_spore_count	B_total_spores
1	A4-01	01-NB1	1	2016-06-09	09:00:00	2016-06-30	Y	1	2	460000	2000	0	2	1	0	1	0	0	2	0	1	0	1	0	4	4000
2	A4-01	01-NB2	1	2016-06-09	09:00:00	2016-07-04	Y	1	15.5	460000	15500	0.71	16	2	3	4	2	5	15	3	4	3	3	2	31	31000
3	A4-01	01-NB3	1	2016-06-09	09:00:00	2016-07-01	N	0	0	460000	0	0	0	0	0	0	0	0	0	0	0	0	0	0	0	0
4	A4-01	01-NB4	1	2016-06-09	09:00:00	2016-07-04	N	0	0	460000	0	0	0	0	0	0	0	0	0	0	0	0	0	0	0	0
5	A4-01	01-NB5	1	2016-06-09	09:00:00	2016-06-30	Y	1	41	460000	41000	1.41	40	7	5	9	6	13	42	10	7	10	7	8	82	82000
6	A4-02	02-NB1	1	2016-06-09	09:00:00	2016-06-30	N	0	0	0	0	0	0	0	0	0	0	0	0	0	0	0	0	0	0	0
7	A4-02	02-NB2	1	2016-06-09	09:00:00	2016-07-01	N	0	0	0	0	0	0	0	0	0	0	0	0	0	0	0	0	0	0	0
8	A4-02	02-NB3	1	2016-06-09	09:00:00	2016-07-04	N	0	0	0	0	0	0	0	0	0	0	0	0	0	0	0	0	0	0	0
9	A4-02	02-NB4	1	2016-06-09	09:00:00	2016-07-04	N	0	0	0	0	0	0	0	0	0	0	0	0	0	0	0	0	0	0	0
10	A4-02	02-NB5	1	2016-06-09	09:00:00	2016-07-04	N	0	0	0	0	0	0	0	0	0	0	0	0	0	0	0	0	0	0	0
11	A4-03	03-NB1	1	2016-06-09	09:00:00	2016-07-04	Y	1	42.5	305000	42500	0.71	43	6	8	9	14	6	42	14	8	7	5	8	85	85000
12	A4-03	03-NB2	1	2016-06-09	09:00:00	2016-07-04	Y	1	51	305000	51000	4.24	54	11	6	14	9	14	48	9	12	11	5	11	102	102000
13	A4-03	03-NB3	1	2016-06-09	09:00:00	2016-07-04	Y	1	69	305000	69000	1.41	68	7	19	16	15	11	70	11	14	23	14	8	138	138000
14	A4-03	03-NB4	1	2016-06-09	09:00:00	2016-07-04	Y	1	30.5	305000	30500	9.19	24	3	4	5	8	4	37	5	9	7	8	8	61	61000
15	A4-03	03-NB5	1	2016-06-09	09:00:00	2016-07-04	Y	1	100.5	305000	100500	27.58	81	12	14	15	16	24	120	22	18	24	23	33	201	201000
16	A4-04	04-NB1	1	2016-06-09	09:00:00	2016-07-04	N	0	0	130000	0	0	0	0	0	0	0	0	0	0	0	0	0	0	0	0
17	A4-04	04-NB2	1	2016-06-09	09:00:00	2016-07-04	N	0	0	130000	0	0	0	0	0	0	0	0	0	0	0	0	0	0	0	0
18	A4-04	04-NB3	1	2016-06-09	09:00:00	2016-07-04	Y	1	6.5	130000	6500	0.71	7	0	0	0	6	1	6	0	0	0	6	0	13	13000
19	A4-04	04-NB4	1	2016-06-09	09:00:00	2016-07-01	N	0	0	130000	0	0	0	0	0	0	0	0	0	0	0	0	0	0	0	0
20	A4-04	04-NB5	1	2016-06-09	09:00:00	2016-07-04	N	0	0	130000	0	0	0	0	0	0	0	0	0	0	0	0	0	0	0	0
21	A4-05	05-NB1	1	2016-06-09	09:00:00	2016-07-04	N	0	0	0	0	0	0	0	0	0	0	0	0	0	0	0	0	0	0	0
22	A4-05	05-NB2	1	2016-06-09	09:00:00	2016-07-04	N	0	0	0	0	0	0	0	0	0	0	0	0	0	0	0	0	0	0	0
23	A4-05	05-NB3	1	2016-06-09	09:00:00	2016-07-04	N	0	0	0	0	0	0	0	0	0	0	0	0	0	0	0	0	0	0	0
24	A4-05	05-NB4	1	2016-06-09	09:00:00	2016-07-04	N	0	0	0	0	0	0	0	0	0	0	0	0	0	0	0	0	0	0	0
25	A4-05	05-NB5	1	2016-06-09	09:00:00	2016-07-04	N	0	0	0	0	0	0	0	0	0	0	0	0	0	0	0	0	0	0	0
26	A4-06	06-NB1	1	2016-06-09	09:00:00	2016-07-04	N	0	0	0	0	0	0	0	0	0	0	0	0	0	0	0	0	0	0	0
27	A4-06	06-NB2	1	2016-06-09	09:00:00	2016-07-01	N	0	0	0	0	0	0	0	0	0	0	0	0	0	0	0	0	0	0	0
28	A4-06	06-NB3	1	2016-06-09	09:00:00	2016-06-30	N	0	0	0	0	0	0	0	0	0	0	0	0	0	0	0	0	0	0	0
29	A4-06	06-NB4	1	2016-06-09	09:00:00	2016-07-04	N	0	0	0	0	0	0	0	0	0	0	0	0	0	0	0	0	0	0	0
30	A4-06	06-NB5	1	2016-06-09	09:00:00	2016-06-29	N	0	0	0	0	0	0	0	0	0	0	0	0	0	0	0	0	0	0	0
31	A4-07	07-NB1	1	2016-06-09	09:00:00	2016-07-04	N	0	0	0	0	0	0	0	0	0	0	0	0	0	0	0	0	0	0	0
32	A4-07	07-NB2	1	2016-06-09	09:00:00	2016-07-04	N	0	0	0	0	0	0	0	0	0	0	0	0	0	0	0	0	0	0	0
33	A4-07	07-NB3	1	2016-06-09	09:00:00	2016-07-04	N	0	0	0	0	0	0	0	0	0	0	0	0	0	0	0	0	0	0	0
34	A4-07	07-NB4	1	2016-06-09	09:00:00	2016-07-04	N	0	0	0	0	0	0	0	0	0	0	0	0	0	0	0	0	0	0	0
35	A4-07	07-NB5	1	2016-06-09	09:00:00	2016-07-04	N	0	0	0	0	0	0	0	0	0	0	0	0	0	0	0	0	0	0	0
36	A4-08	08-NB1	1	2016-06-09	09:00:00	2016-06-30	Y	1	5	150000	5000	0	5	1	1	0	2	1	5	0	1	1	2	1	10	10000
37	A4-08	08-NB2	1	2016-06-09	09:00:00	2016-06-30	N	0	0	150000	0	0	0	0	0	0	0	0	0	0	0	0	0	0	0	0
38	A4-08	08-NB3	1	2016-06-09	09:00:00	2016-07-04	N	0	0	150000	0	0	0	0	0	0	0	0	0	0	0	0	0	0	0	0
39	A4-08	08-NB4	1	2016-06-09	09:00:00	2016-07-04	N	0	0	150000	0	0	0	0	0	0	0	0	0	0	0	0	0	0	0	0
40	A4-08	08-NB5	1	2016-06-09	09:00:00	2016-07-01	N	0	0	150000	0	0	0	0	0	0	0	0	0	0	0	0	0	0	0	0
41	A4-09	09-NB1	1	2016-06-09	09:00:00	2016-07-04	Y	1	61	85000	61000	11.31	53	4	11	9	14	15	69	12	12	16	14	15	122	122000
42	A4-09	09-NB2	1	2016-06-09	09:00:00	2016-07-04	Y	1	57.5	85000	57500	26.16	39	1	5	7	16	10	76	12	13	15	13	23	115	115000
43	A4-09	09-NB3	1	2016-06-09	09:00:00	2016-07-01	Y	1	139	85000	139000	21.21	154	28	29	39	22	36	124	26	25	19	30	24	278	278000
44	A4-09	09-NB4	1	2016-06-09	09:00:00	2016-07-04	N	0	0	85000	0	0	0	0	0	0	0	0	0	0	0	0	0	0	0	0
45	A4-09	09-NB5	1	2016-06-09	09:00:00	2016-07-04	Y	1	39	85000	39000	4.24	36	9	7	5	7	8	42	6	8	10	8	10	78	78000
46	A4-10	10-NB1	1	2016-06-09	09:00:00	2016-07-04	N	0	0	110000	0	0	0	0	0	0	0	0	0	0	0	0	0	0	0	0
47	A4-10	10-NB2	1	2016-06-09	09:00:00	2016-07-04	Y	1	34	110000	34000	14.14	24	4	6	1	5	8	44	6	10	9	8	11	68	68000
48	A4-10	10-NB3	1	2016-06-09	09:00:00	2016-07-01	Y	1	38.5	110000	38500	0.71	39	7	3	11	10	8	38	7	7	9	7	8	77	77000
49	A4-10	10-NB4	1	2016-06-09	09:00:00	2016-07-04	Y	1	51.5	110000	51500	17.68	39	12	5	10	6	6	64	11	16	11	15	11	103	103000
50	A4-10	10-NB5	1	2016-06-09	09:00:00	2016-07-04	Y	1	91.5	110000	91500	7.78	86	13	20	19	20	14	97	26	19	14	22	16	183	183000
51	A4-11	11-NB1	1	2016-06-09	09:00:00		N	0	0	0	0	0	0	0	0	0	0	0	0	0	0	0	0	0	0	0
52	A4-11	11-NB2	1	2016-06-09	09:00:00	2016-07-01	N	0	0	0	0	0	0	0	0	0	0	0	0	0	0	0	0	0	0	0
53	A4-11	11-NB3	1	2016-06-09	09:00:00	2016-07-04	N	0	0	0	0	0	0	0	0	0	0	0	0	0	0	0	0	0	0	0
54	A4-11	11-NB4	1	2016-06-09	09:00:00	2016-07-04	N	0	0	0	0	0	0	0	0	0	0	0	0	0	0	0	0	0	0	0
55	A4-11	11-NB5	1	2016-06-09	09:00:00	2016-07-04	N	0	0	0	0	0	0	0	0	0	0	0	0	0	0	0	0	0	0	0
56	A4-12	12-NB1	1	2016-06-09	09:00:00	2016-07-04	Y	1	130	120000	130000	63.64	85	11	9	18	23	24	175	39	40	33	29	34	260	260000
57	A4-12	12-NB2	1	2016-06-09	09:00:00	2016-07-04	N	0	0	120000	0	0	0	0	0	0	0	0	0	0	0	0	0	0	0	0
58	A4-12	12-NB3	1	2016-06-09	09:00:00	2016-07-04	N	0	0	120000	0	0	0	0	0	0	0	0	0	0	0	0	0	0	0	0
59	A4-12	12-NB4	1	2016-06-09	09:00:00	2016-07-04	Y	1	129	120000	129000	49.5	94	8	19	21	28	18	164	32	30	42	17	43	258	258000
60	A4-12	12-NB5	1	2016-06-09	09:00:00	2016-07-04	Y	1	28	120000	28000	5.66	24	2	5	6	1	10	32	5	5	4	8	10	56	56000
61	A4-13	13-NB1	1	2016-06-09	09:00:00	2016-07-04	N	0	0	260000	0	0	0	0	0	0	0	0	0	0	0	0	0	0	0	0
62	A4-13	13-NB2	1	2016-06-09	09:00:00	2016-07-04	Y	1	13	260000	13000	2.83	11	6	1	2	1	1	15	0	3	6	6	0	26	26000
63	A4-13	13-NB3	1	2016-06-09	09:00:00	2016-07-04	N	0	0	260000	0	0	0	0	0	0	0	0	0	0	0	0	0	0	0	0
64	A4-13	13-NB4	1	2016-06-09	09:00:00	2016-07-04	N	0	0	260000	0	0	0	0	0	0	0	0	0	0	0	0	0	0	0	0
65	A4-13	13-NB5	1	2016-06-09	09:00:00	2016-07-04	N	0	0	260000	0	0	0	0	0	0	0	0	0	0	0	0	0	0	0	0
66	A4-14	14-NB1	1	2016-06-09	09:00:00	2016-07-04	N	0	0	110000	0	0	0	0	0	0	0	0	0	0	0	0	0	0	0	0
67	A4-14	14-NB2	1	2016-06-09	09:00:00	2016-07-01	N	0	0	110000	0	0	0	0	0	0	0	0	0	0	0	0	0	0	0	0
68	A4-14	14-NB3	1	2016-06-09	09:00:00	2016-07-01	Y	1	2.5	110000	2500	0.71	3	1	0	2	0	0	2	0	1	0	1	0	5	5000
69	A4-14	14-NB4	1	2016-06-09	09:00:00	2016-07-01	N	0	0	110000	0	0	0	0	0	0	0	0	0	0	0	0	0	0	0	0
70	A4-14	14-NB5	1	2016-06-09	09:00:00	2016-07-04	N	0	0	110000	0	0	0	0	0	0	0	0	0	0	0	0	0	0	0	0
71	A4-15	15-NB1	1	2016-06-09	09:00:00	2016-07-04	N	0	0	0	0	0	0	0	0	0	0	0	0	0	0	0	0	0	0	0
72	A4-15	15-NB2	1	2016-06-09	09:00:00	2016-06-29	N	0	0	0	0	0	0	0	0	0	0	0	0	0	0	0	0	0	0	0
73	A4-15	15-NB3	1	2016-06-09	09:00:00	2016-07-01	N	0	0	0	0	0	0	0	0	0	0	0	0	0	0	0	0	0	0	0
74	A4-15	15-NB4	1	2016-06-09	09:00:00	2016-07-04	N	0	0	0	0	0	0	0	0	0	0	0	0	0	0	0	0	0	0	0
75	A4-15	15-NB5	1	2016-06-09	09:00:00	2016-07-04	N	0	0	0	0	0	0	0	0	0	0	0	0	0	0	0	0	0	0	0
76	A4-16	16-NB1	0	2016-06-09	09:00:00	2016-07-04	N	0	0	0	0	0	0	0	0	0	0	0	0	0	0	0	0	0	0	0
77	A4-16	16-NB2	0	2016-06-09	09:00:00	2016-07-04	N	0	0	0	0	0	0	0	0	0	0	0	0	0	0	0	0	0	0	0
78	A4-16	16-NB3	0	2016-06-09	09:00:00	2016-07-01	N	0	0	0	0	0	0	0	0	0	0	0	0	0	0	0	0	0	0	0
79	A4-16	16-NB4	0	2016-06-09	09:00:00	2016-07-04	N	0	0	0	0	0	0	0	0	0	0	0	0	0	0	0	0	0	0	0
80	A4-16	16-NB5	0	2016-06-09	09:00:00	2016-07-04	N	0	0	0	0	0	0	0	0	0	0	0	0	0	0	0	0	0	0	0
81	A4-17	17-NB1	0	2016-06-09	09:00:00	2016-07-04	N	0	0	0	0	0	0	0	0	0	0	0	0	0	0	0	0	0	0	0
82	A4-17	17-NB2	0	2016-06-09	09:00:00	2016-07-04	N	0	0	0	0	0	0	0	0	0	0	0	0	0	0	0	0	0	0	0
83	A4-17	17-NB3	0	2016-06-09	09:00:00	2016-07-04	N	0	0	0	0	0	0	0	0	0	0	0	0	0	0	0	0	0	0	0
84	A4-17	17-NB4	0	2016-06-09	09:00:00	2016-07-04	N	0	0	0	0	0	0	0	0	0	0	0	0	0	0	0	0	0	0	0
85	A4-17	17-NB5	0	2016-06-09	09:00:00	2016-07-04	N	0	0	0	0	0	0	0	0	0	0	0	0	0	0	0	0	0	0	0
86	A4-18	18-NB1	0	2016-06-09	09:00:00	2016-07-04	N	0	0	0	0	0	0	0	0	0	0	0	0	0	0	0	0	0	0	0
87	A4-18	18-NB2	0	2016-06-09	09:00:00	2016-07-04	N	0	0	0	0	0	0	0	0	0	0	0	0	0	0	0	0	0	0	0
88	A4-18	18-NB3	0	2016-06-09	09:00:00	2016-07-04	N	0	0	0	0	0	0	0	0	0	0	0	0	0	0	0	0	0	0	0
89	A4-18	18-NB4	0	2016-06-09	09:00:00	2016-07-04	N	0	0	0	0	0	0	0	0	0	0	0	0	0	0	0	0	0	0	0
90	A4-18	18-NB5	0	2016-06-09	09:00:00	2016-07-01	N	0	0	0	0	0	0	0	0	0	0	0	0	0	0	0	0	0	0	0
91	A4-19	19-NB1	0	2016-06-09	09:00:00	2016-07-04	N	0	0	0	0	0	0	0	0	0	0	0	0	0	0	0	0	0	0	0
92	A4-19	19-NB2	0	2016-06-09	09:00:00	2016-07-04	N	0	0	0	0	0	0	0	0	0	0	0	0	0	0	0	0	0	0	0
93	A4-19	19-NB3	0	2016-06-09	09:00:00	2016-06-29	N	0	0	0	0	0	0	0	0	0	0	0	0	0	0	0	0	0	0	0
94	A4-19	19-NB4	0	2016-06-09	09:00:00	2016-07-04	N	0	0	0	0	0	0	0	0	0	0	0	0	0	0	0	0	0	0	0
95	A4-19	19-NB5	0	2016-06-09	09:00:00	2016-07-04	N	0	0	0	0	0	0	0	0	0	0	0	0	0	0	0	0	0	0	0
96	A4-20	20-NB1	0	2016-06-09	09:00:00	2016-07-04	N	0	0	0	0	0	0	0	0	0	0	0	0	0	0	0	0	0	0	0
97	A4-20	20-NB2	0	2016-06-09	09:00:00	2016-07-04	N	0	0	0	0	0	0	0	0	0	0	0	0	0	0	0	0	0	0	0
98	A4-20	20-NB3	0	2016-06-09	09:00:00	2016-07-04	N	0	0	0	0	0	0	0	0	0	0	0	0	0	0	0	0	0	0	0
99	A4-20	20-NB4	0	2016-06-09	09:00:00	2016-07-04	N	0	0	0	0	0	0	0	0	0	0	0	0	0	0	0	0	0	0	0
100	A4-20	20-NB5	0	2016-06-09	09:00:00	2016-07-04	N	0	0	0	0	0	0	0	0	0	0	0	0	0	0	0	0	0	0	0
101	A4-21	21-NB1	0	2016-06-09	09:00:00	2016-07-04	N	0	0	0	0	0	0	0	0	0	0	0	0	0	0	0	0	0	0	0
102	A4-21	21-NB2	0	2016-06-09	09:00:00	2016-06-30	N	0	0	0	0	0	0	0	0	0	0	0	0	0	0	0	0	0	0	0
103	A4-21	21-NB3	0	2016-06-09	09:00:00	2016-07-01	N	0	0	0	0	0	0	0	0	0	0	0	0	0	0	0	0	0	0	0
104	A4-21	21-NB4	0	2016-06-09	09:00:00	2016-07-01	N	0	0	0	0	0	0	0	0	0	0	0	0	0	0	0	0	0	0	0
105	A4-21	21-NB5	0	2016-06-09	09:00:00	2016-07-04	N	0	0	0	0	0	0	0	0	0	0	0	0	0	0	0	0	0	0	0
106	A4-22	22-NB1	0	2016-06-09	09:00:00	2016-07-01	N	0	0	0	0	0	0	0	0	0	0	0	0	0	0	0	0	0	0	0
107	A4-22	22-NB2	0	2016-06-09	09:00:00	2016-07-04	N	0	0	0	0	0	0	0	0	0	0	0	0	0	0	0	0	0	0	0
108	A4-22	22-NB3	0	2016-06-09	09:00:00	2016-07-04	N	0	0	0	0	0	0	0	0	0	0	0	0	0	0	0	0	0	0	0
109	A4-22	22-NB4	0	2016-06-09	09:00:00	2016-07-01	N	0	0	0	0	0	0	0	0	0	0	0	0	0	0	0	0	0	0	0
110	A4-22	22-NB5	0	2016-06-09	09:00:00	2016-06-30	N	0	0	0	0	0	0	0	0	0	0	0	0	0	0	0	0	0	0	0
111	A4-23	23-NB1	0	2016-06-09	09:00:00	2016-07-04	N	0	0	0	0	0	0	0	0	0	0	0	0	0	0	0	0	0	0	0
112	A4-23	23-NB2	0	2016-06-09	09:00:00	2016-06-29	N	0	0	0	0	0	0	0	0	0	0	0	0	0	0	0	0	0	0	0
113	A4-23	23-NB3	0	2016-06-09	09:00:00	2016-07-04	N	0	0	0	0	0	0	0	0	0	0	0	0	0	0	0	0	0	0	0
114	A4-23	23-NB4	0	2016-06-09	09:00:00	2016-07-04	N	0	0	0	0	0	0	0	0	0	0	0	0	0	0	0	0	0	0	0
115	A4-23	23-NB5	0	2016-06-09	09:00:00	2016-06-30	N	0	0	0	0	0	0	0	0	0	0	0	0	0	0	0	0	0	0	0
116	A4-24	24-NB1	0	2016-06-09	09:00:00		N	0	0	0	0	0	0	0	0	0	0	0	0	0	0	0	0	0	0	0
117	A4-24	24-NB2	0	2016-06-09	09:00:00		N	0	0	0	0	0	0	0	0	0	0	0	0	0	0	0	0	0	0	0
118	A4-24	24-NB3	0	2016-06-09	09:00:00		N	0	0	0	0	0	0	0	0	0	0	0	0	0	0	0	0	0	0	0
119	A4-24	24-NB4	0	2016-06-09	09:00:00		N	0	0	0	0	0	0	0	0	0	0	0	0	0	0	0	0	0	0	0
120	A4-24	24-NB5	0	2016-06-09	09:00:00		N	0	0	0	0	0	0	0	0	0	0	0	0	0	0	0	0	0	0	0
121	A4-25	25-NB1	0	2016-06-09	09:00:00	2016-07-04	N	0	0	0	0	0	0	0	0	0	0	0	0	0	0	0	0	0	0	0
122	A4-25	25-NB2	0	2016-06-09	09:00:00	2016-07-04	N	0	0	0	0	0	0	0	0	0	0	0	0	0	0	0	0	0	0	0
123	A4-25	25-NB3	0	2016-06-09	09:00:00	2016-07-04	N	0	0	0	0	0	0	0	0	0	0	0	0	0	0	0	0	0	0	0
124	A4-25	25-NB4	0	2016-06-09	09:00:00	2016-07-04	N	0	0	0	0	0	0	0	0	0	0	0	0	0	0	0	0	0	0	0
125	A4-25	25-NB5	0	2016-06-09	09:00:00	2016-07-04	N	0	0	0	0	0	0	0	0	0	0	0	0	0	0	0	0	0	0	0
126	A4-26	26-NB1	0	2016-06-09	09:00:00	2016-07-04	N	0	0	0	0	0	0	0	0	0	0	0	0	0	0	0	0	0	0	0
127	A4-26	26-NB2	0	2016-06-09	09:00:00	2016-07-01	N	0	0	0	0	0	0	0	0	0	0	0	0	0	0	0	0	0	0	0
128	A4-26	26-NB3	0	2016-06-09	09:00:00	2016-07-04	N	0	0	0	0	0	0	0	0	0	0	0	0	0	0	0	0	0	0	0
129	A4-26	26-NB4	0	2016-06-09	09:00:00	2016-07-04	N	0	0	0	0	0	0	0	0	0	0	0	0	0	0	0	0	0	0	0
130	A4-26	26-NB5	0	2016-06-09	09:00:00	2016-06-29	N	0	0	0	0	0	0	0	0	0	0	0	0	0	0	0	0	0	0	0
131	A4-27	27-NB1	0	2016-06-09	09:00:00	2016-07-04	N	0	0	0	0	0	0	0	0	0	0	0	0	0	0	0	0	0	0	0
132	A4-27	27-NB2	0	2016-06-09	09:00:00	2016-07-04	N	0	0	0	0	0	0	0	0	0	0	0	0	0	0	0	0	0	0	0
133	A4-27	27-NB3	0	2016-06-09	09:00:00	2016-07-01	N	0	0	0	0	0	0	0	0	0	0	0	0	0	0	0	0	0	0	0
134	A4-27	27-NB4	0	2016-06-09	09:00:00	2016-07-01	N	0	0	0	0	0	0	0	0	0	0	0	0	0	0	0	0	0	0	0
135	A4-27	27-NB5	0	2016-06-09	09:00:00	2016-07-04	N	0	0	0	0	0	0	0	0	0	0	0	0	0	0	0	0	0	0	0
136	A4-28	28-NB1	0	2016-06-09	09:00:00	2016-07-04	N	0	0	0	0	0	0	0	0	0	0	0	0	0	0	0	0	0	0	0
137	A4-28	28-NB2	0	2016-06-09	09:00:00	2016-07-04	N	0	0	0	0	0	0	0	0	0	0	0	0	0	0	0	0	0	0	0
138	A4-28	28-NB3	0	2016-06-09	09:00:00	2016-07-01	N	0	0	0	0	0	0	0	0	0	0	0	0	0	0	0	0	0	0	0
139	A4-28	28-NB4	0	2016-06-09	09:00:00	2016-07-04	N	0	0	0	0	0	0	0	0	0	0	0	0	0	0	0	0	0	0	0
140	A4-28	28-NB5	0	2016-06-09	09:00:00	2016-07-04	N	0	0	0	0	0	0	0	0	0	0	0	0	0	0	0	0	0	0	0
141	A4-29	29-NB1	0	2016-06-09	09:00:00	2016-07-04	N	0	0	0	0	0	0	0	0	0	0	0	0	0	0	0	0	0	0	0
142	A4-29	29-NB2	0	2016-06-09	09:00:00	2016-06-30	N	0	0	0	0	0	0	0	0	0	0	0	0	0	0	0	0	0	0	0
143	A4-29	29-NB3	0	2016-06-09	09:00:00	2016-07-04	N	0	0	0	0	0	0	0	0	0	0	0	0	0	0	0	0	0	0	0
144	A4-29	29-NB4	0	2016-06-09	09:00:00	2016-07-04	N	0	0	0	0	0	0	0	0	0	0	0	0	0	0	0	0	0	0	0
145	A4-29	29-NB5	0	2016-06-09	09:00:00	2016-07-04	N	0	0	0	0	0	0	0	0	0	0	0	0	0	0	0	0	0	0	0
146	A4-30	30-NB1	0	2016-06-09	09:00:00	2016-07-04	N	0	0	0	0	0	0	0	0	0	0	0	0	0	0	0	0	0	0	0
147	A4-30	30-NB2	0	2016-06-09	09:00:00	2016-07-04	N	0	0	0	0	0	0	0	0	0	0	0	0	0	0	0	0	0	0	0
148	A4-30	30-NB3	0	2016-06-09	09:00:00	2016-07-04	N	0	0	0	0	0	0	0	0	0	0	0	0	0	0	0	0	0	0	0
149	A4-30	30-NB4	0	2016-06-09	09:00:00	2016-07-04	N	0	0	0	0	0	0	0	0	0	0	0	0	0	0	0	0	0	0	0
150	A4-30	30-NB5	0	2016-06-09	09:00:00	2016-07-01	N	0	0	0	0	0	0	0	0	0	0	0	0	0	0	0	0	0	0	0
